# Supplementary material for: Biochemical patterns of antibody polyreactivity revealed through a bioinformatics-based analysis of CDR loops
Source: eLife journal article supplement (doi:10.7554/elife.61393), 2020-11-10

**A**

## Human Polyreactive Antibodies (314 Clones)

Heavy Chain J-Gene

Heavy Chain V-Gene

Light Chain V-Gene

Light Chain J-Gene

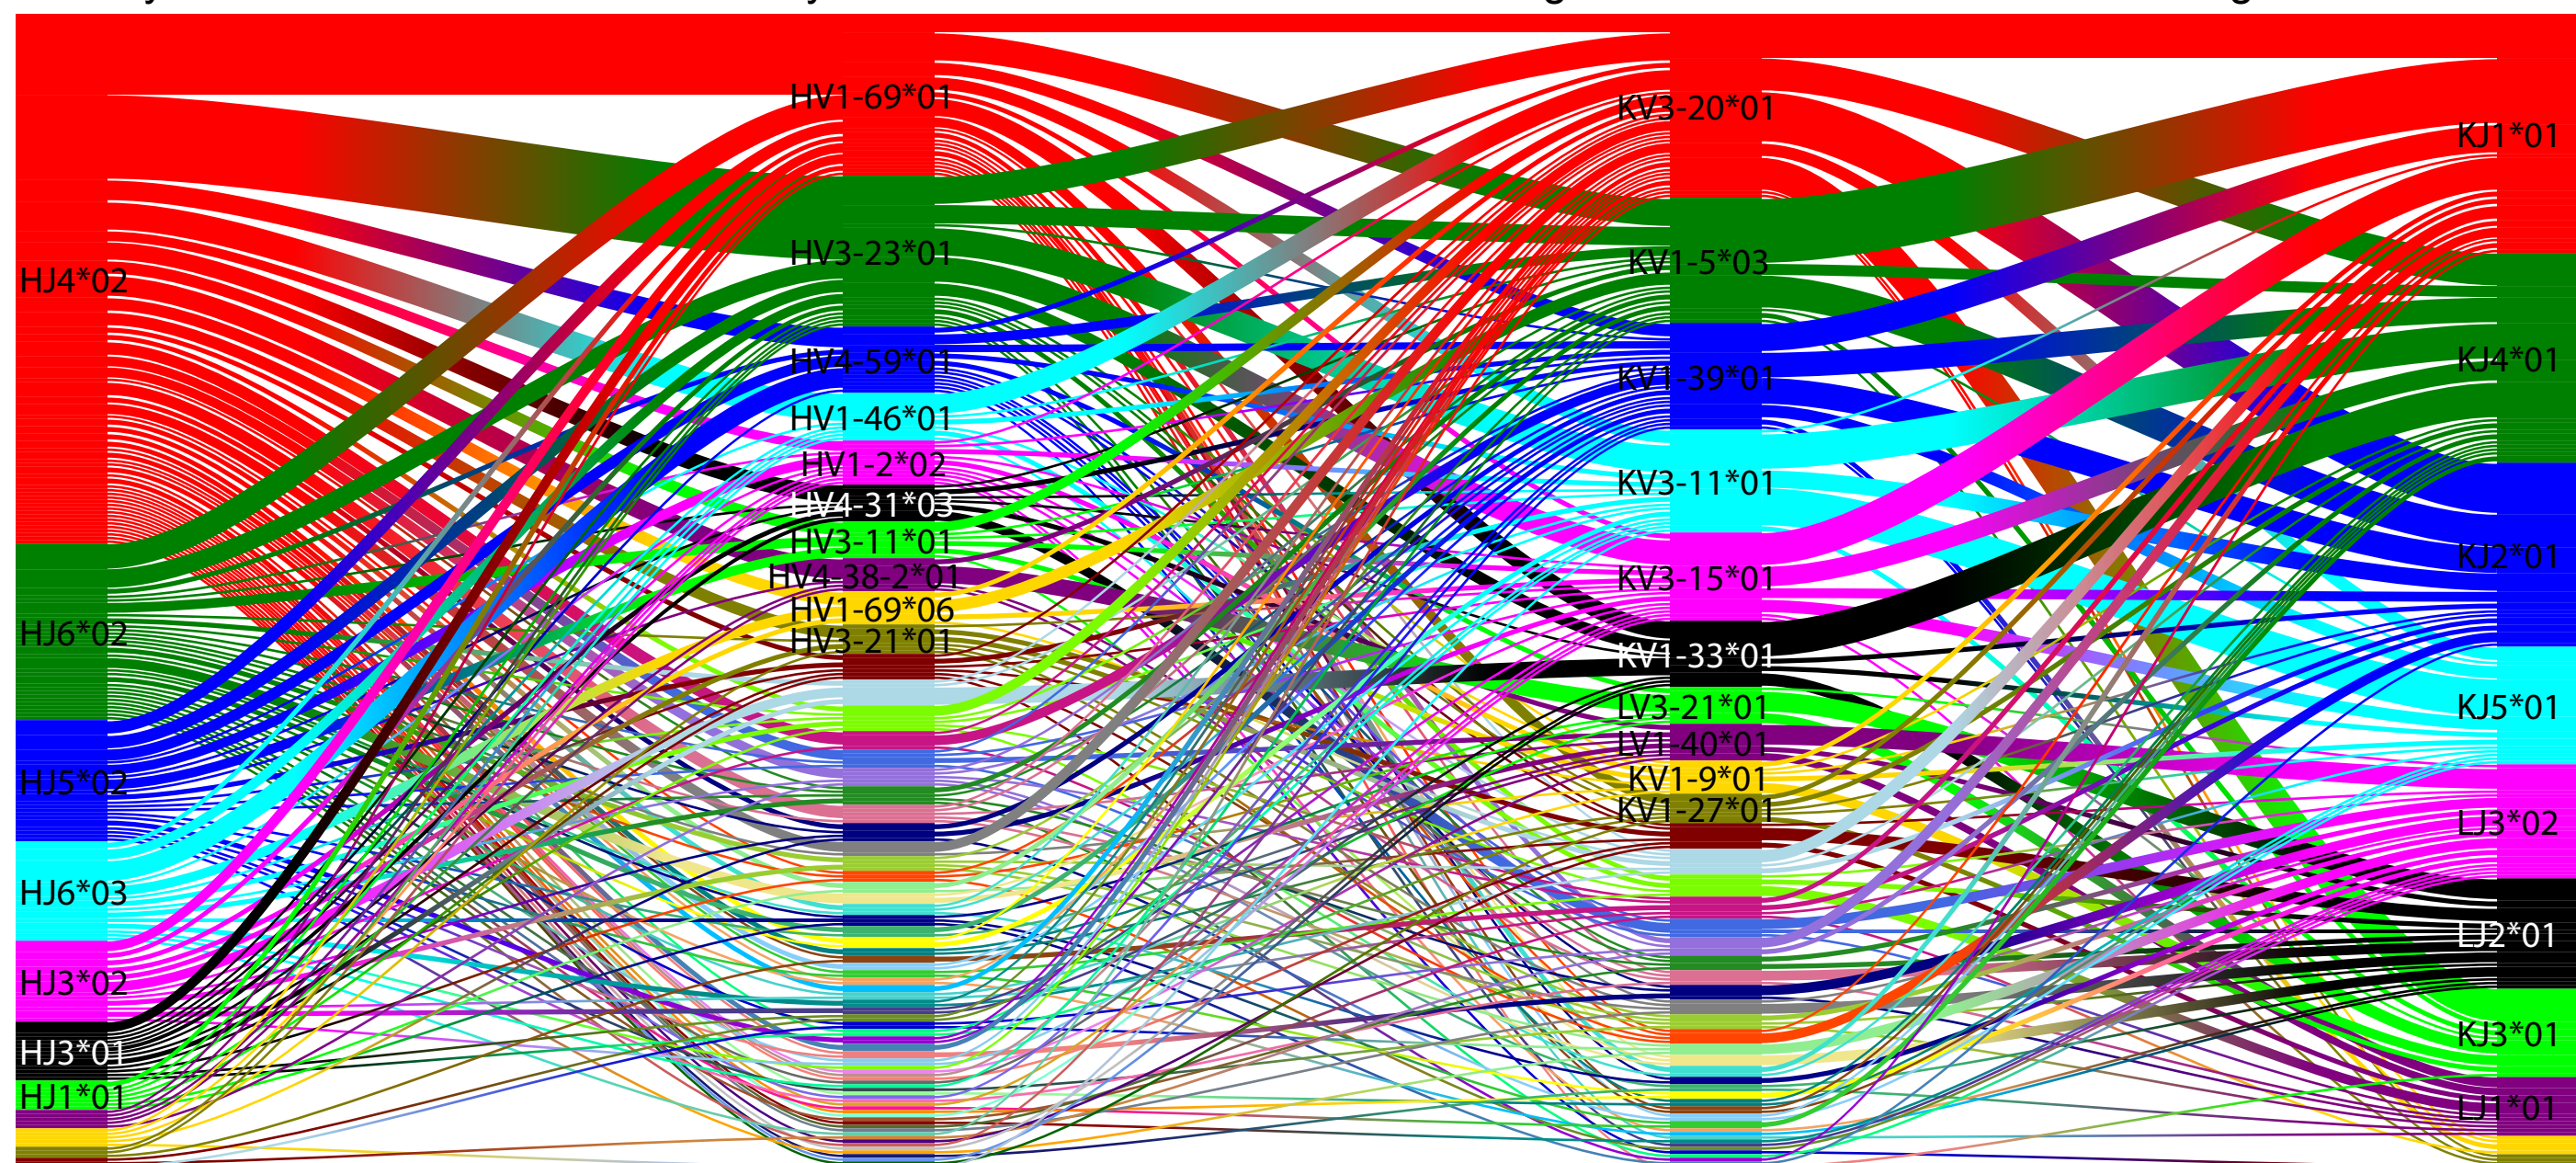**B**

## Human Non-Polyreactive Antibodies (371 Clones)

Heavy Chain J-Gene

Heavy Chain V-Gene

Light Chain V-Gene

Light Chain J-Gene

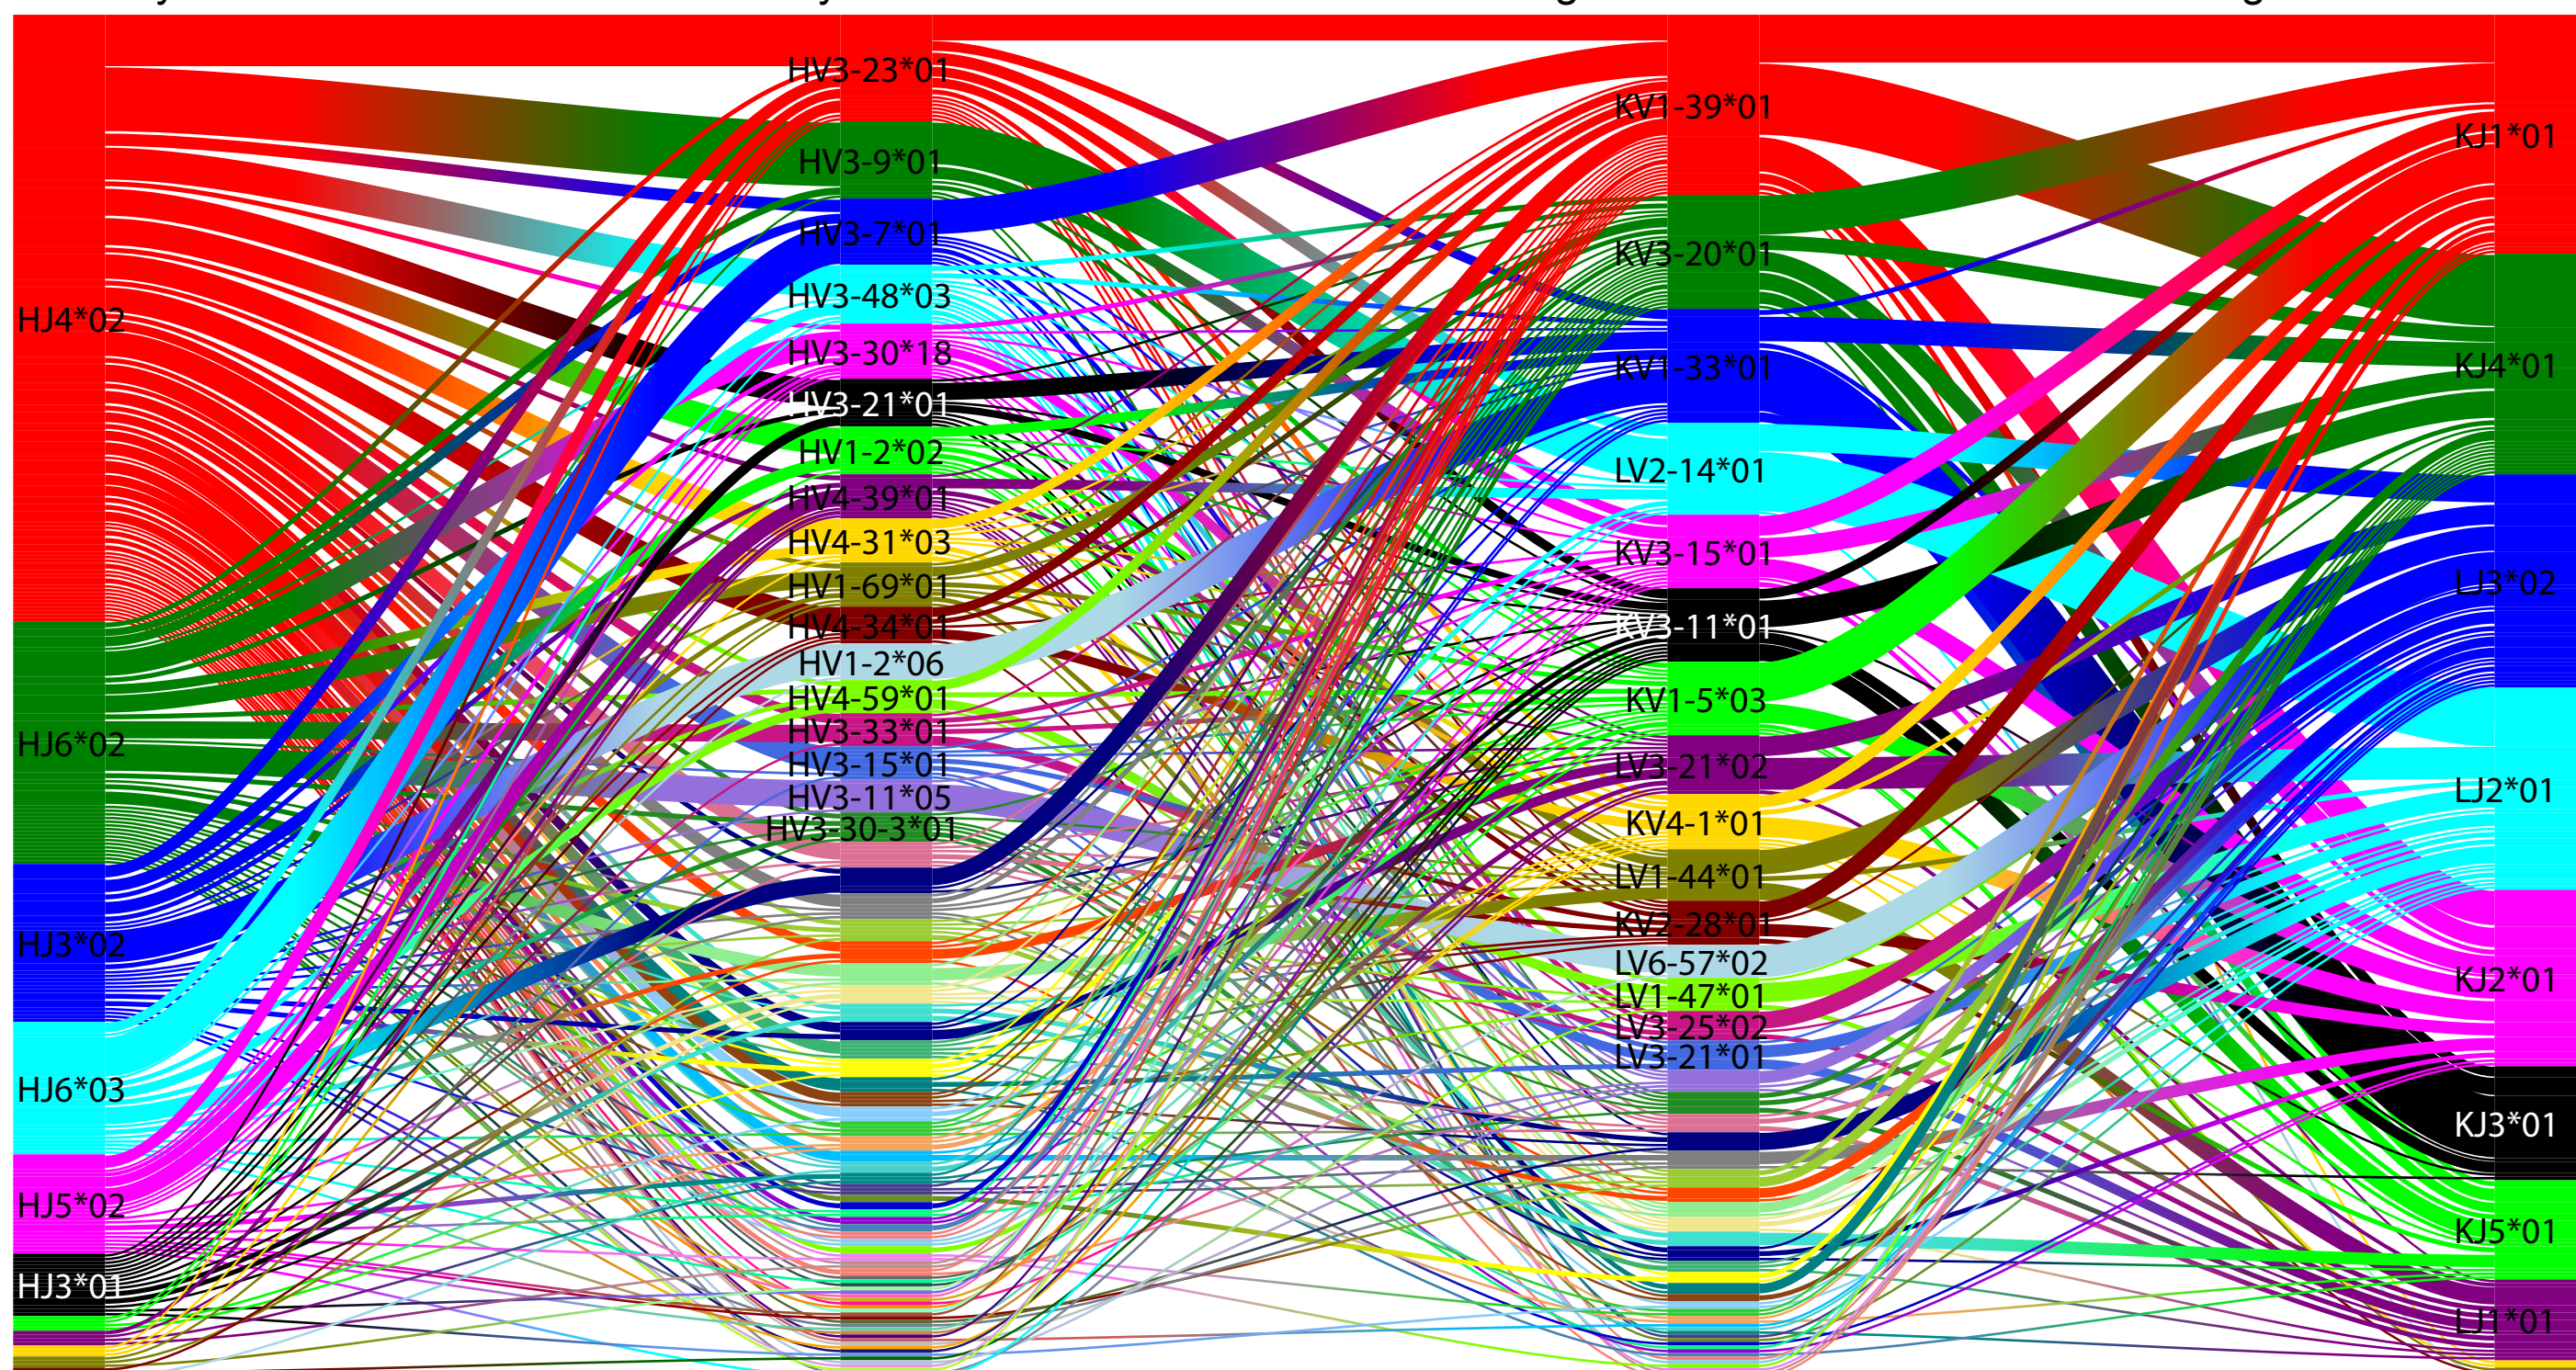

Supplement: supp [file elife-61393-supp-v1.zip]
