# Supplementary material for: Biochemical patterns of antibody polyreactivity revealed through a bioinformatics-based analysis of CDR loops
Source: eLife journal article supplement (doi:10.7554/elife.61393), 2020-11-10
Supplement: supp [file elife-61393-supp-v1.zip]

Archive with 14 entries (14 files):
- elife_poa_e61393_Transparent_Reporting_File.docx
- elife_poa_e61393_Figure_1_figure_supplement_1.pdf
- elife_poa_e61393_Figure_1_figure_supplement_2.pdf
- elife_poa_e61393_Figure_1_figure_supplement_3.pdf
- elife_poa_e61393_Figure_1_figure_supplement_4.pdf
- elife_poa_e61393_Figure_1_figure_supplement_5.pdf
- elife_poa_e61393_Figure_2_figure_supplement_1.pdf
- elife_poa_e61393_Figure_3_figure_supplement_1.pdf
- elife_poa_e61393_Figure_3_figure_supplement_2.pdf
- elife_poa_e61393_Figure_4_figure_supplement_1.pdf
- elife_poa_e61393_Figure_4_figure_supplement_2.pdf
- elife_poa_e61393_Figure_4_figure_supplement_3.pdf
- elife_poa_e61393_Figure_5_figure_supplement_1.pdf
- elife_poa_e61393_Figure_5_figure_supplement_2.pdf
