# Supplementary material for: Biochemical patterns of antibody polyreactivity revealed through a bioinformatics-based analysis of CDR loops
Source: eLife journal article supplement (doi:10.7554/elife.61393), 2020-11-10

**A**

Human Parsed Polyreactive Antibodies (254 Clones)  
IGHV IGKV (LV)

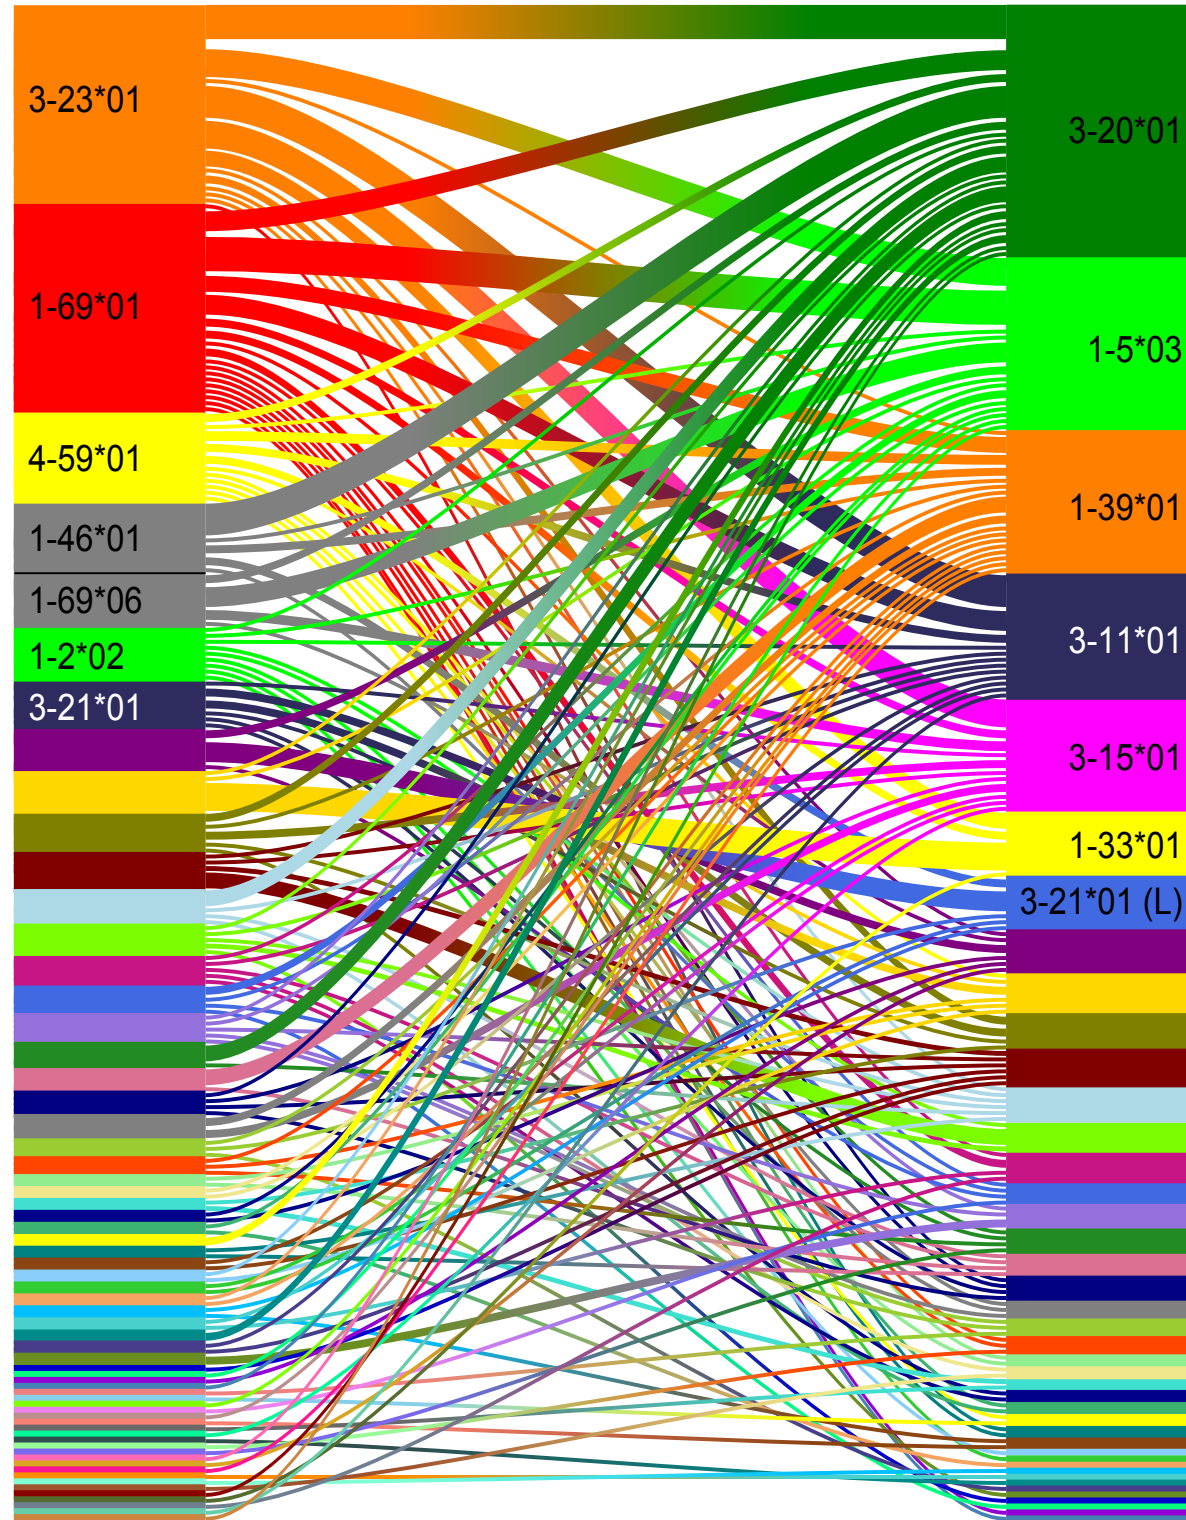**B**

Human Parsed Non-Polyreactive Antibodies (218 Clones)  
IGHV IGKV (LV)

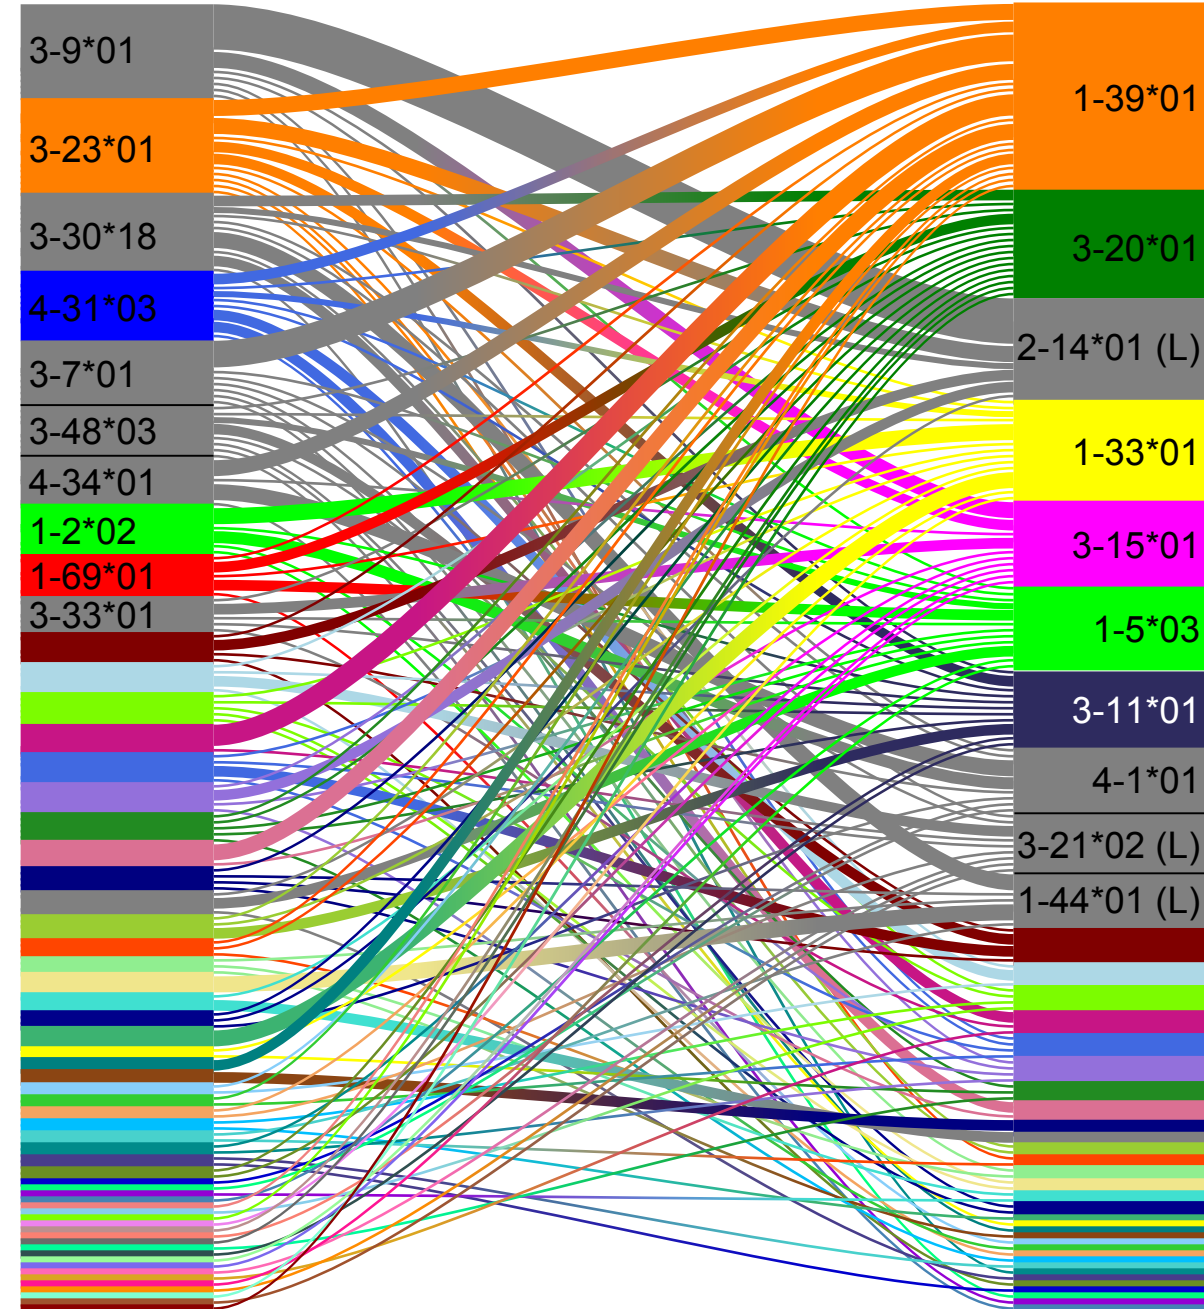

Supplement: supp [file elife-61393-supp-v1.zip]
