# Supplementary figures and images for: Biochemical patterns of antibody polyreactivity revealed through a bioinformatics-based analysis of CDR loops
Source: eLife journal article supplement (doi:10.7554/elife.61393), 2020-11-10

**A**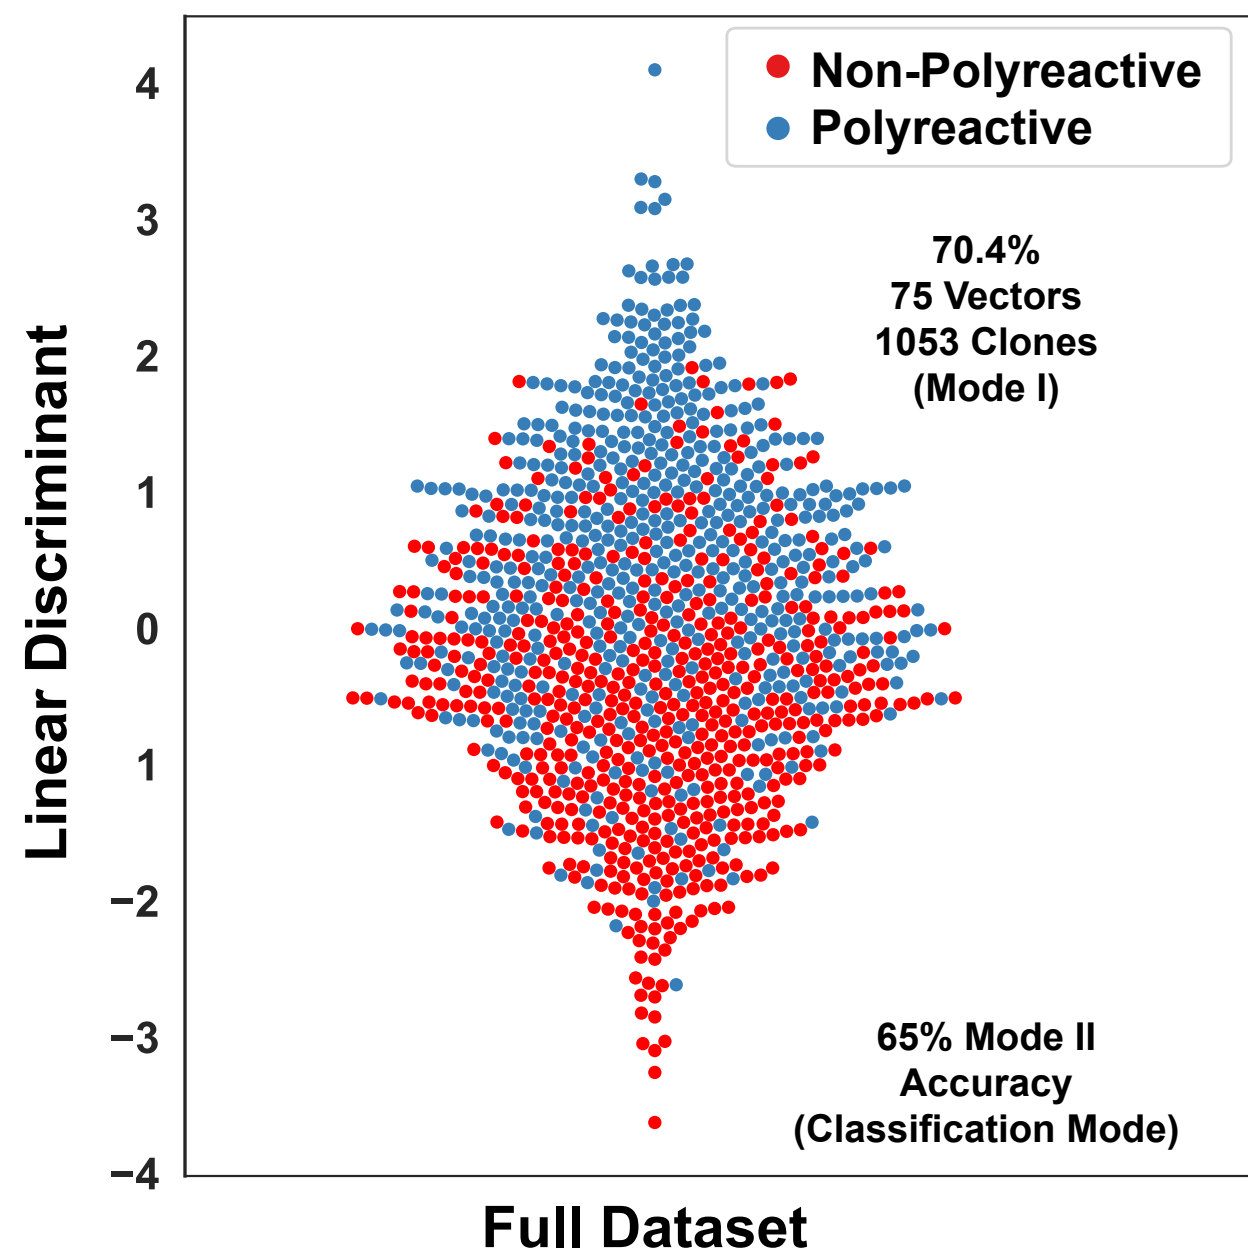**B**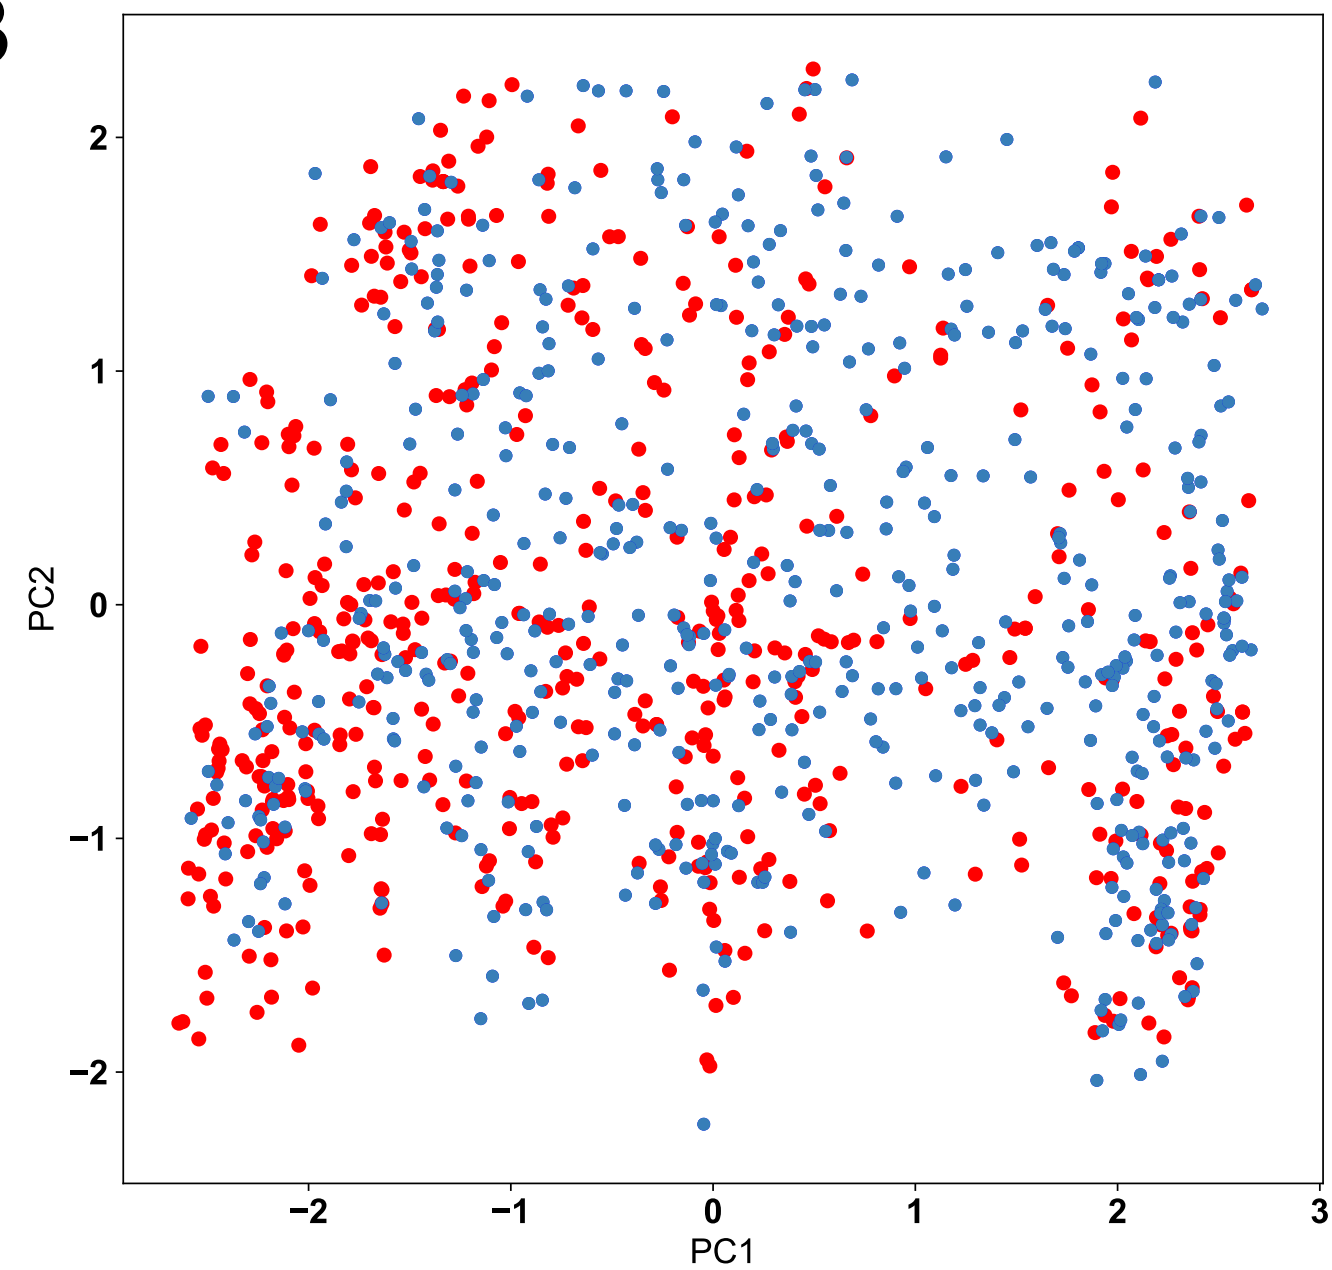**C**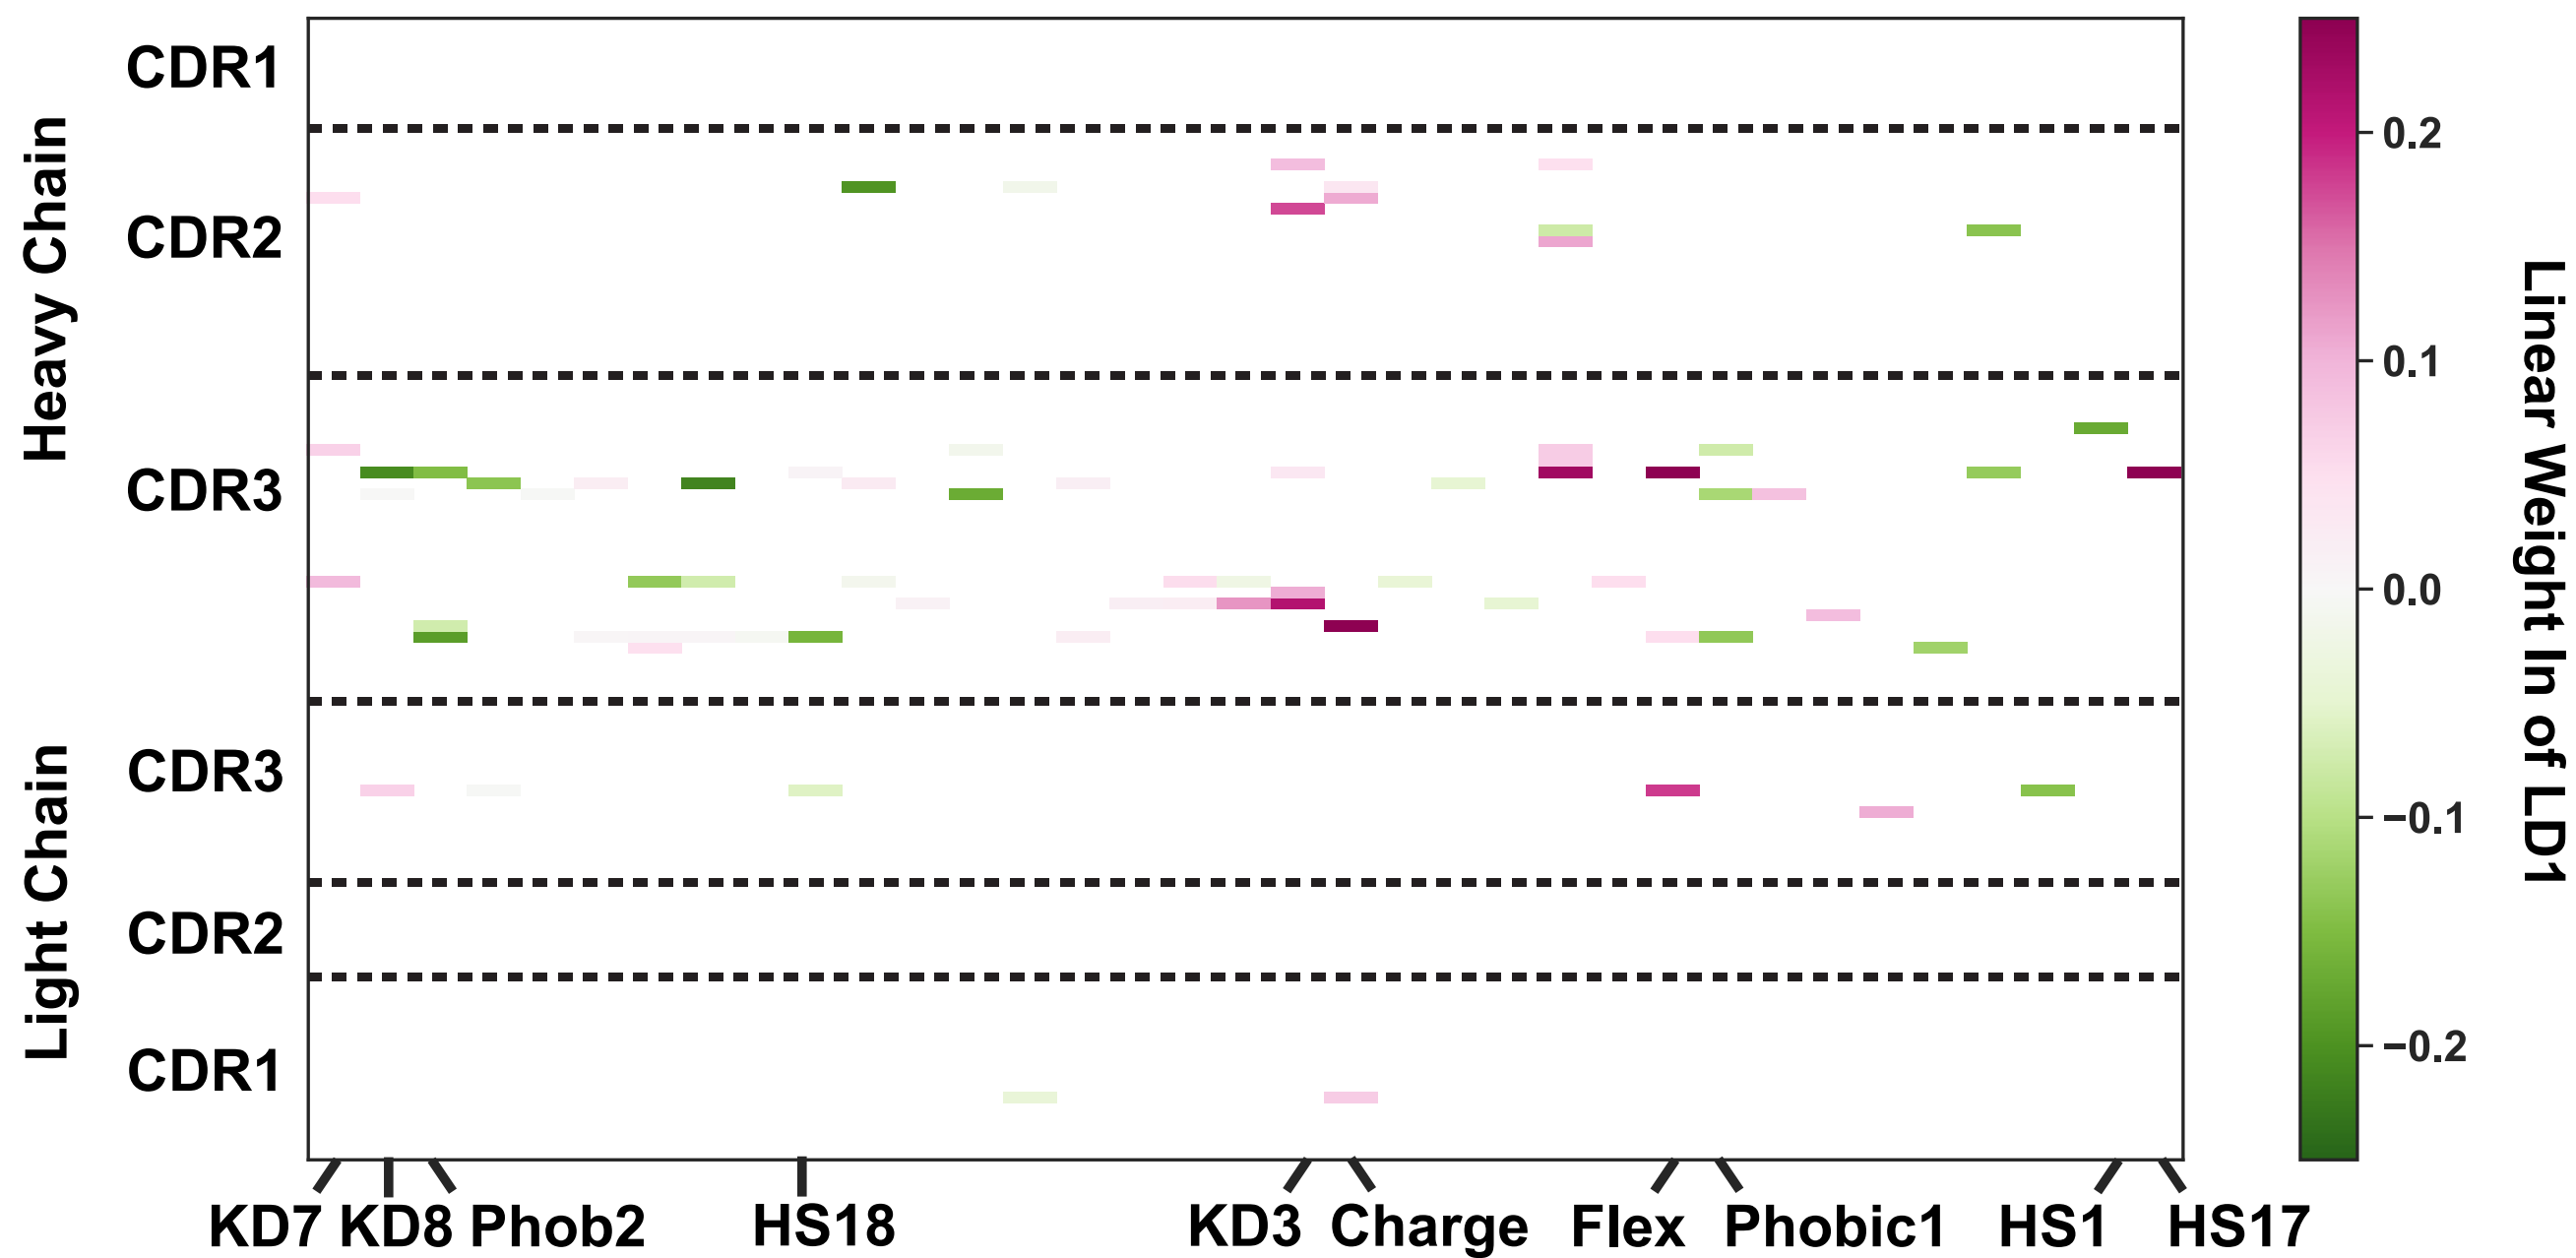

Supplement: supp [file elife-61393-supp-v1.zip]

**A**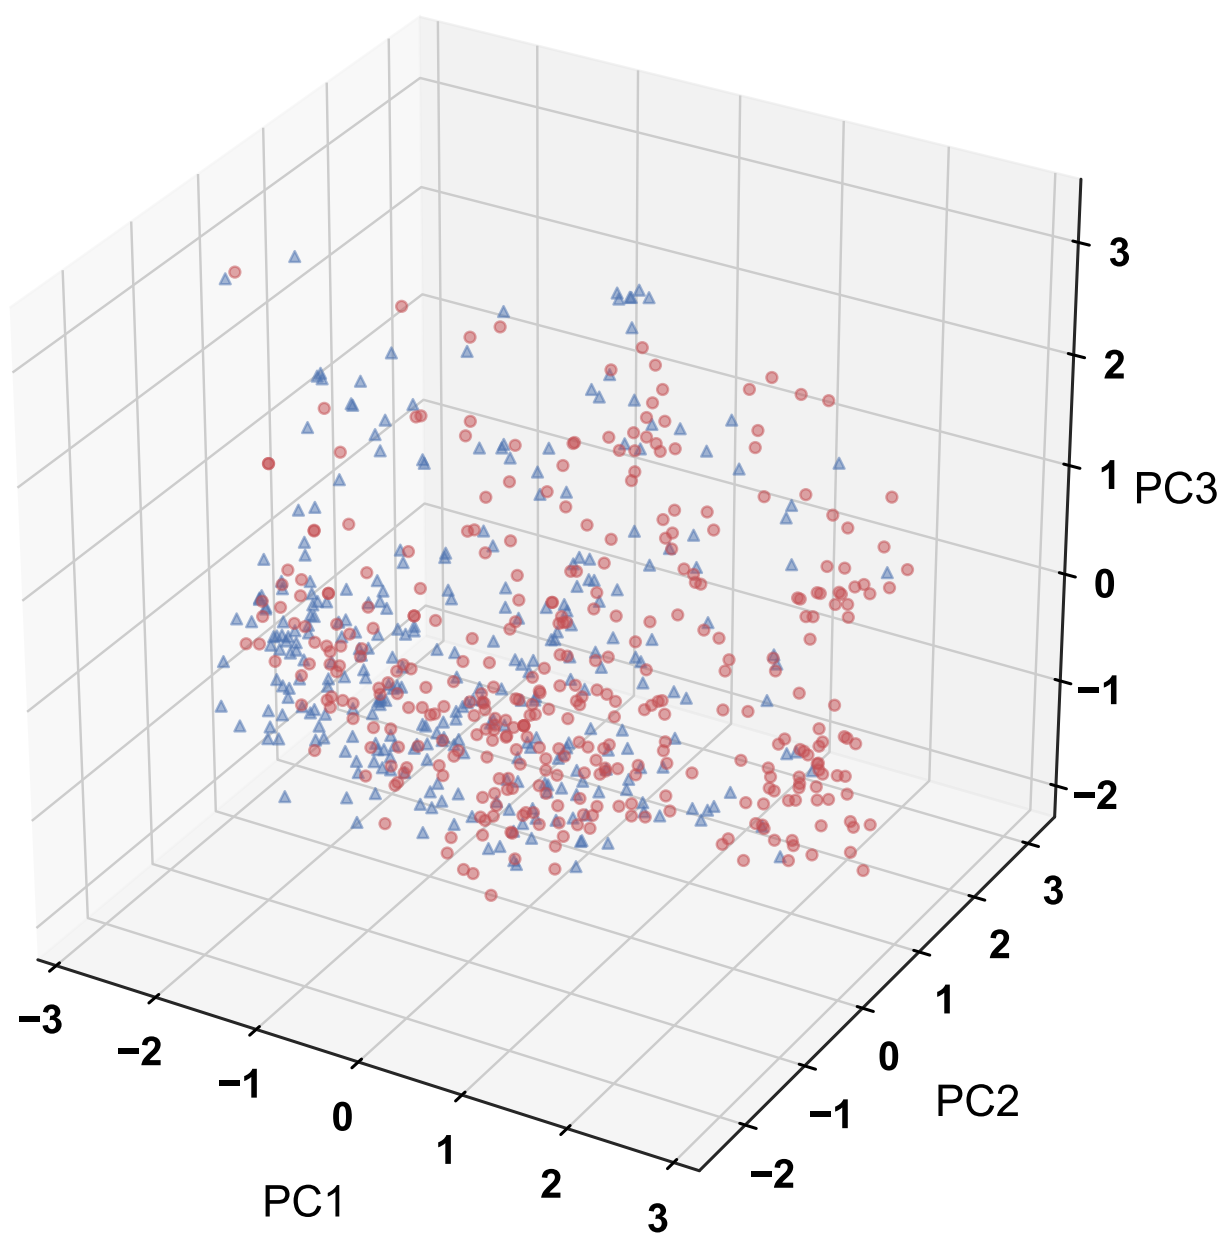**B**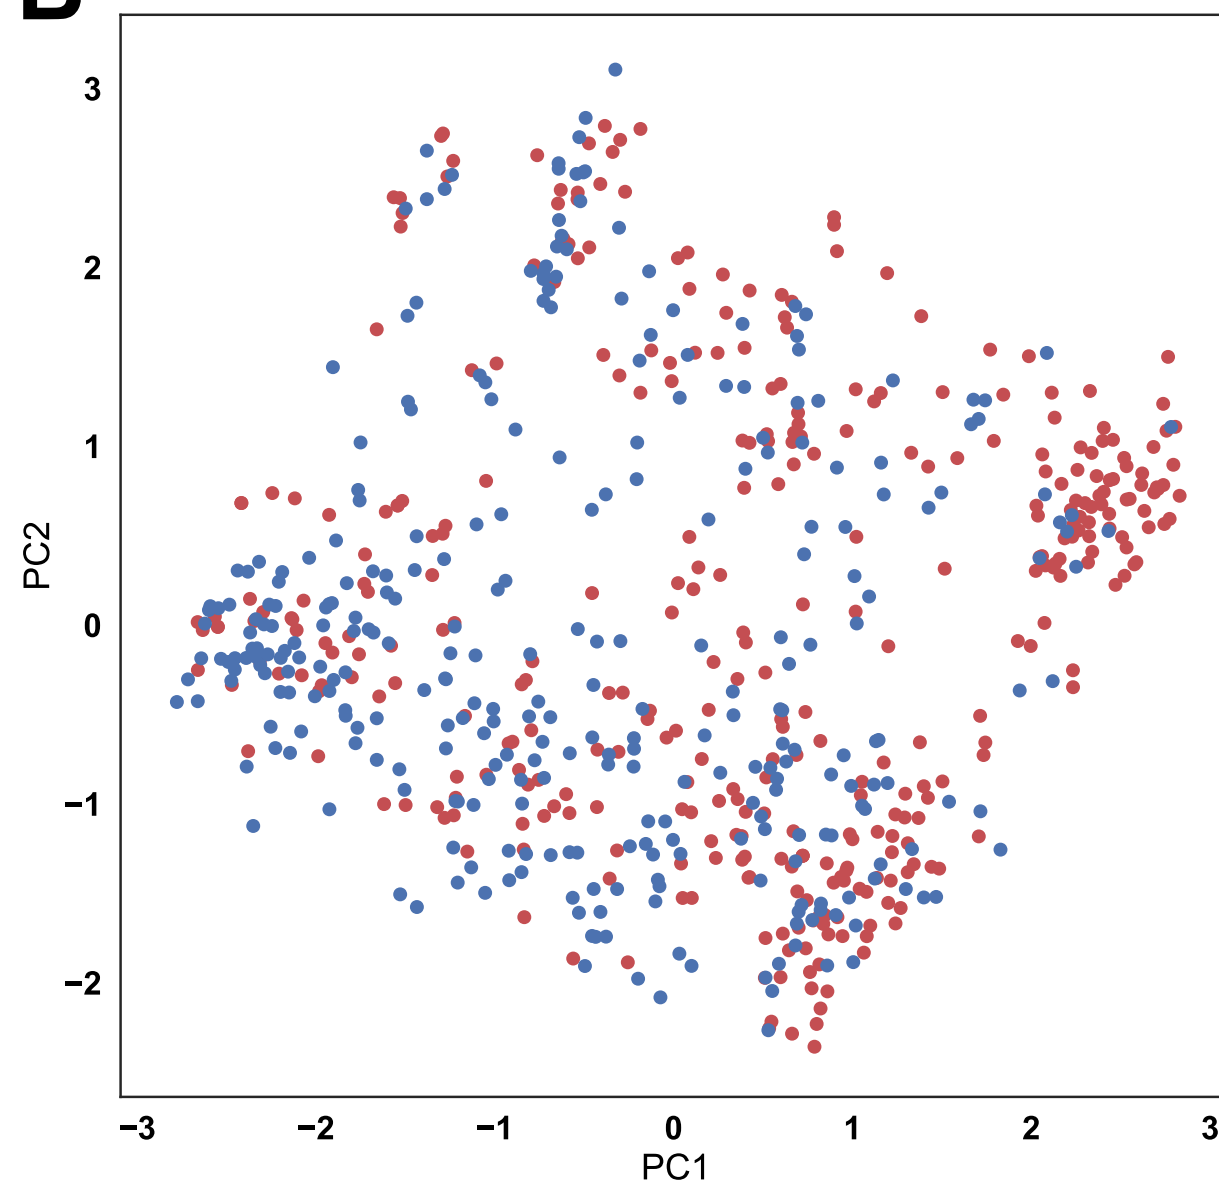**C**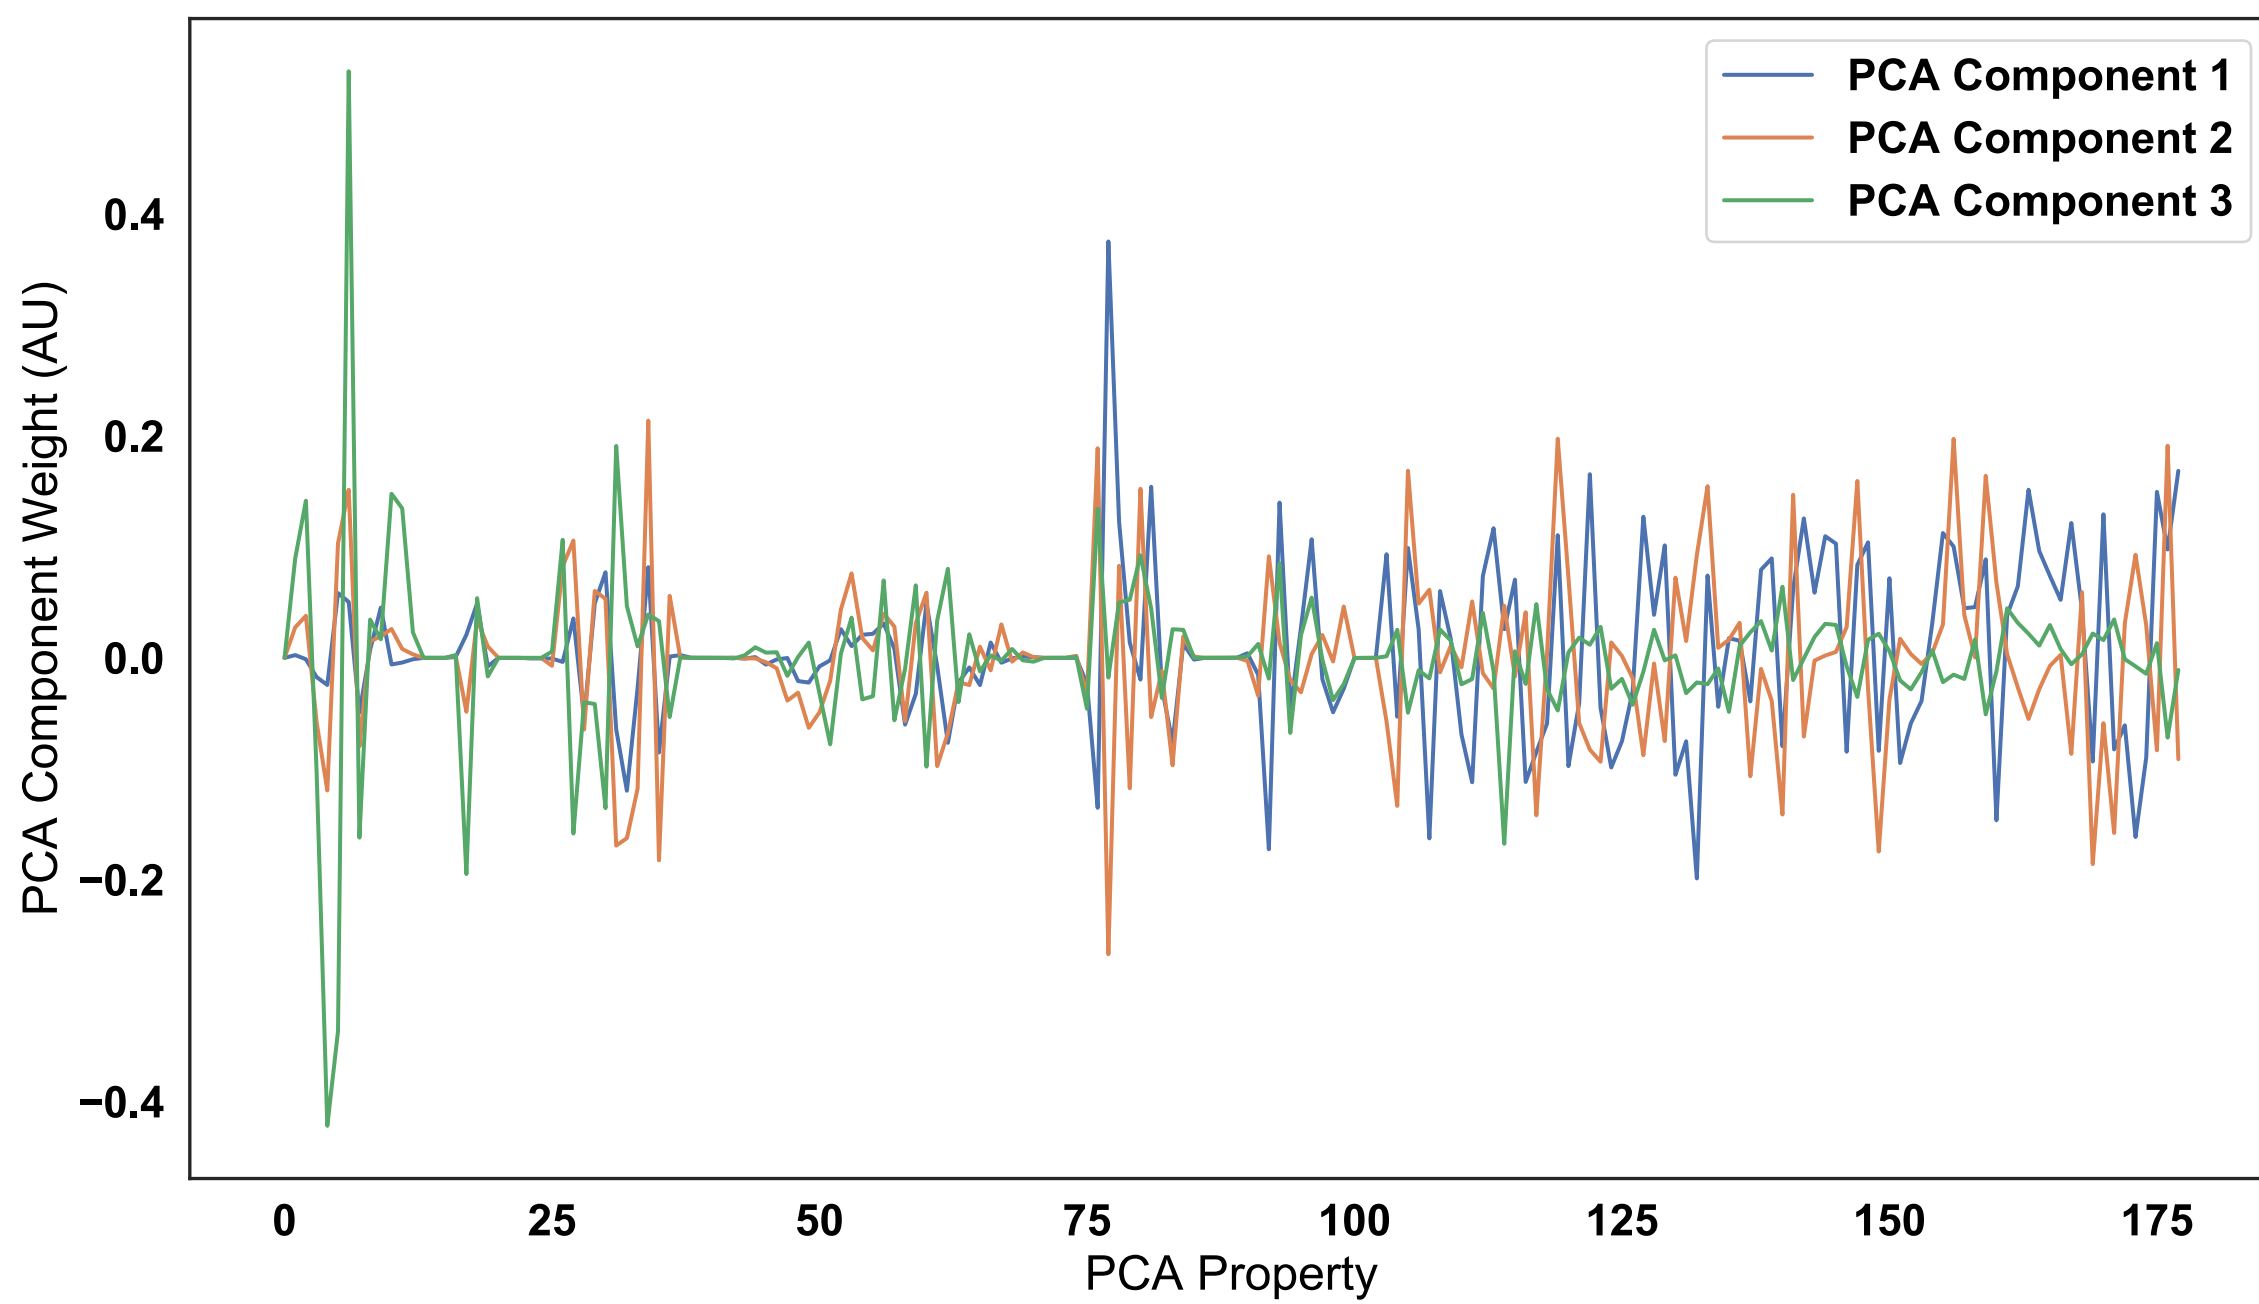

Supplement: supp [file elife-61393-supp-v1.zip]

Light Chain

Heavy Chain

CDR3 CDR2 CDR1

CDR3

CDR2

CDR1

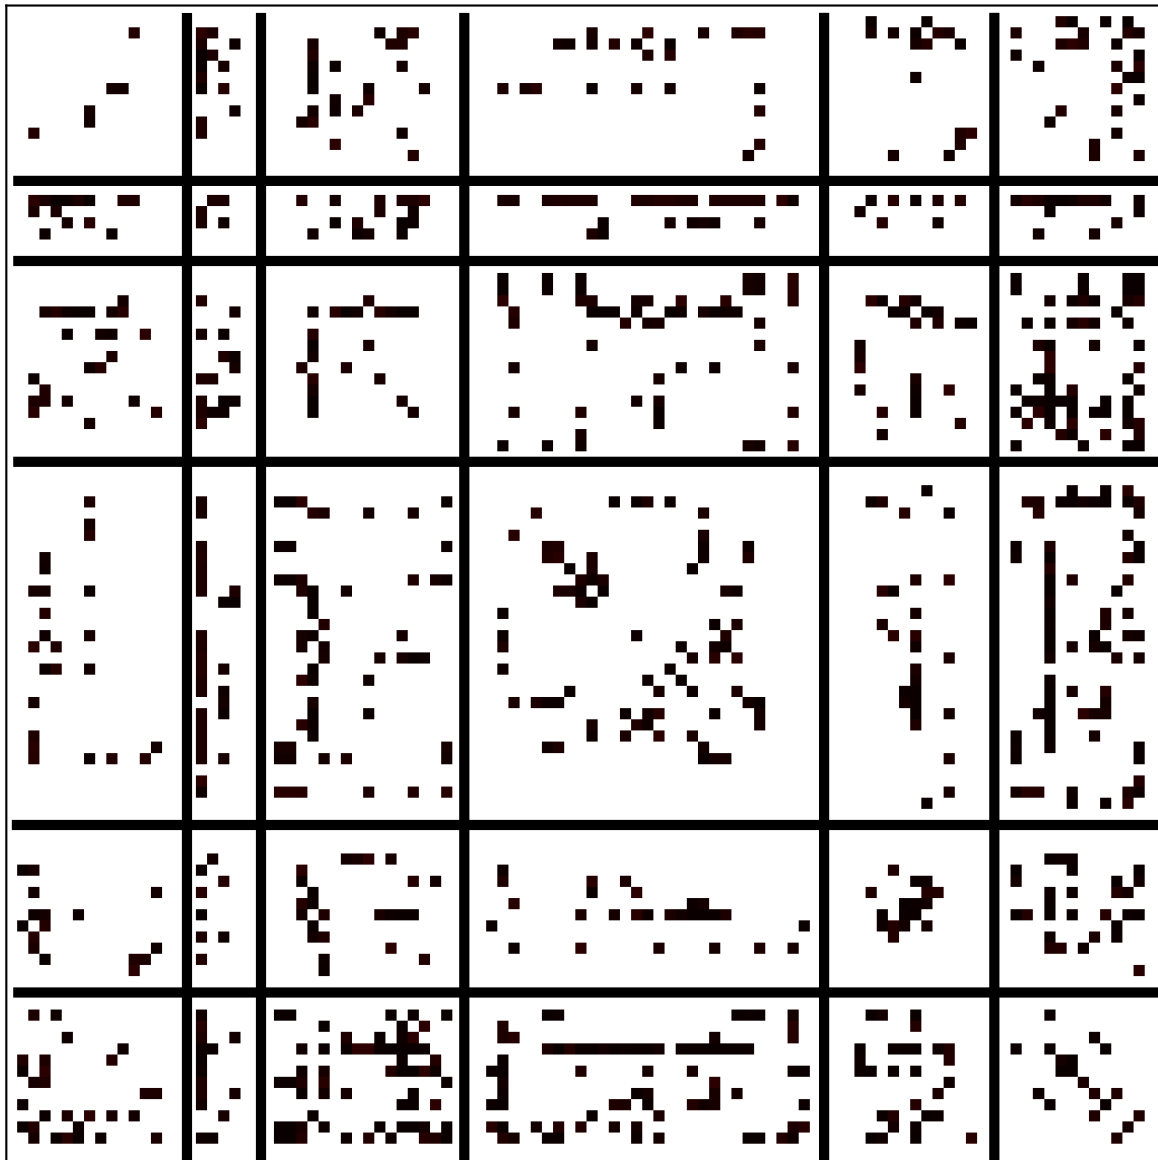

Light Chain

Heavy Chain

Supplement: supp [file elife-61393-supp-v1.zip]

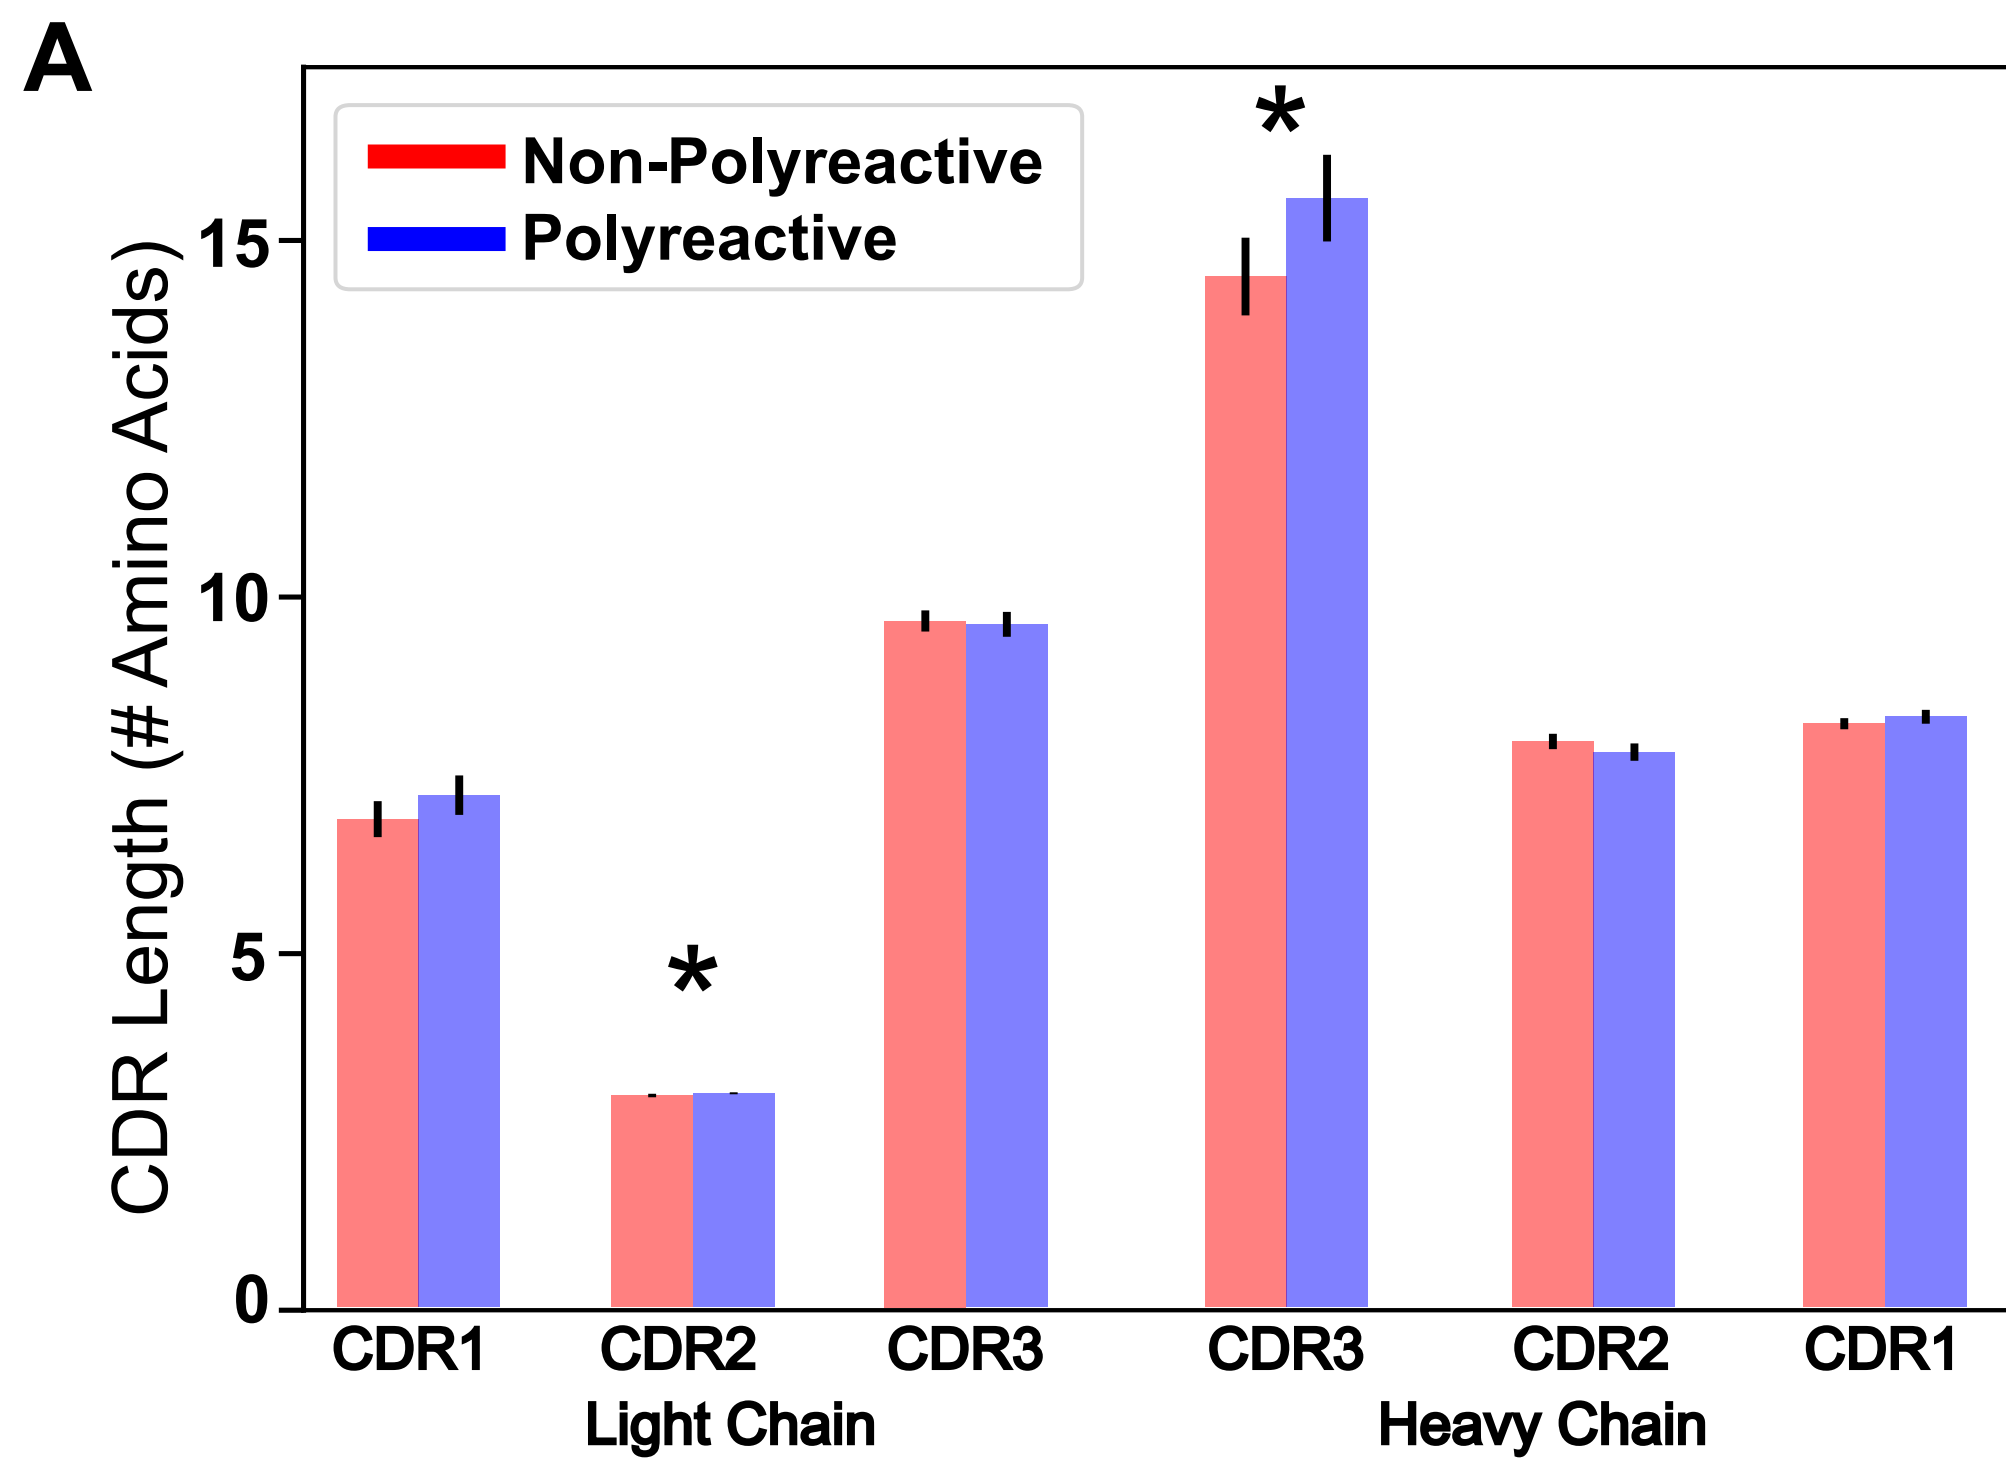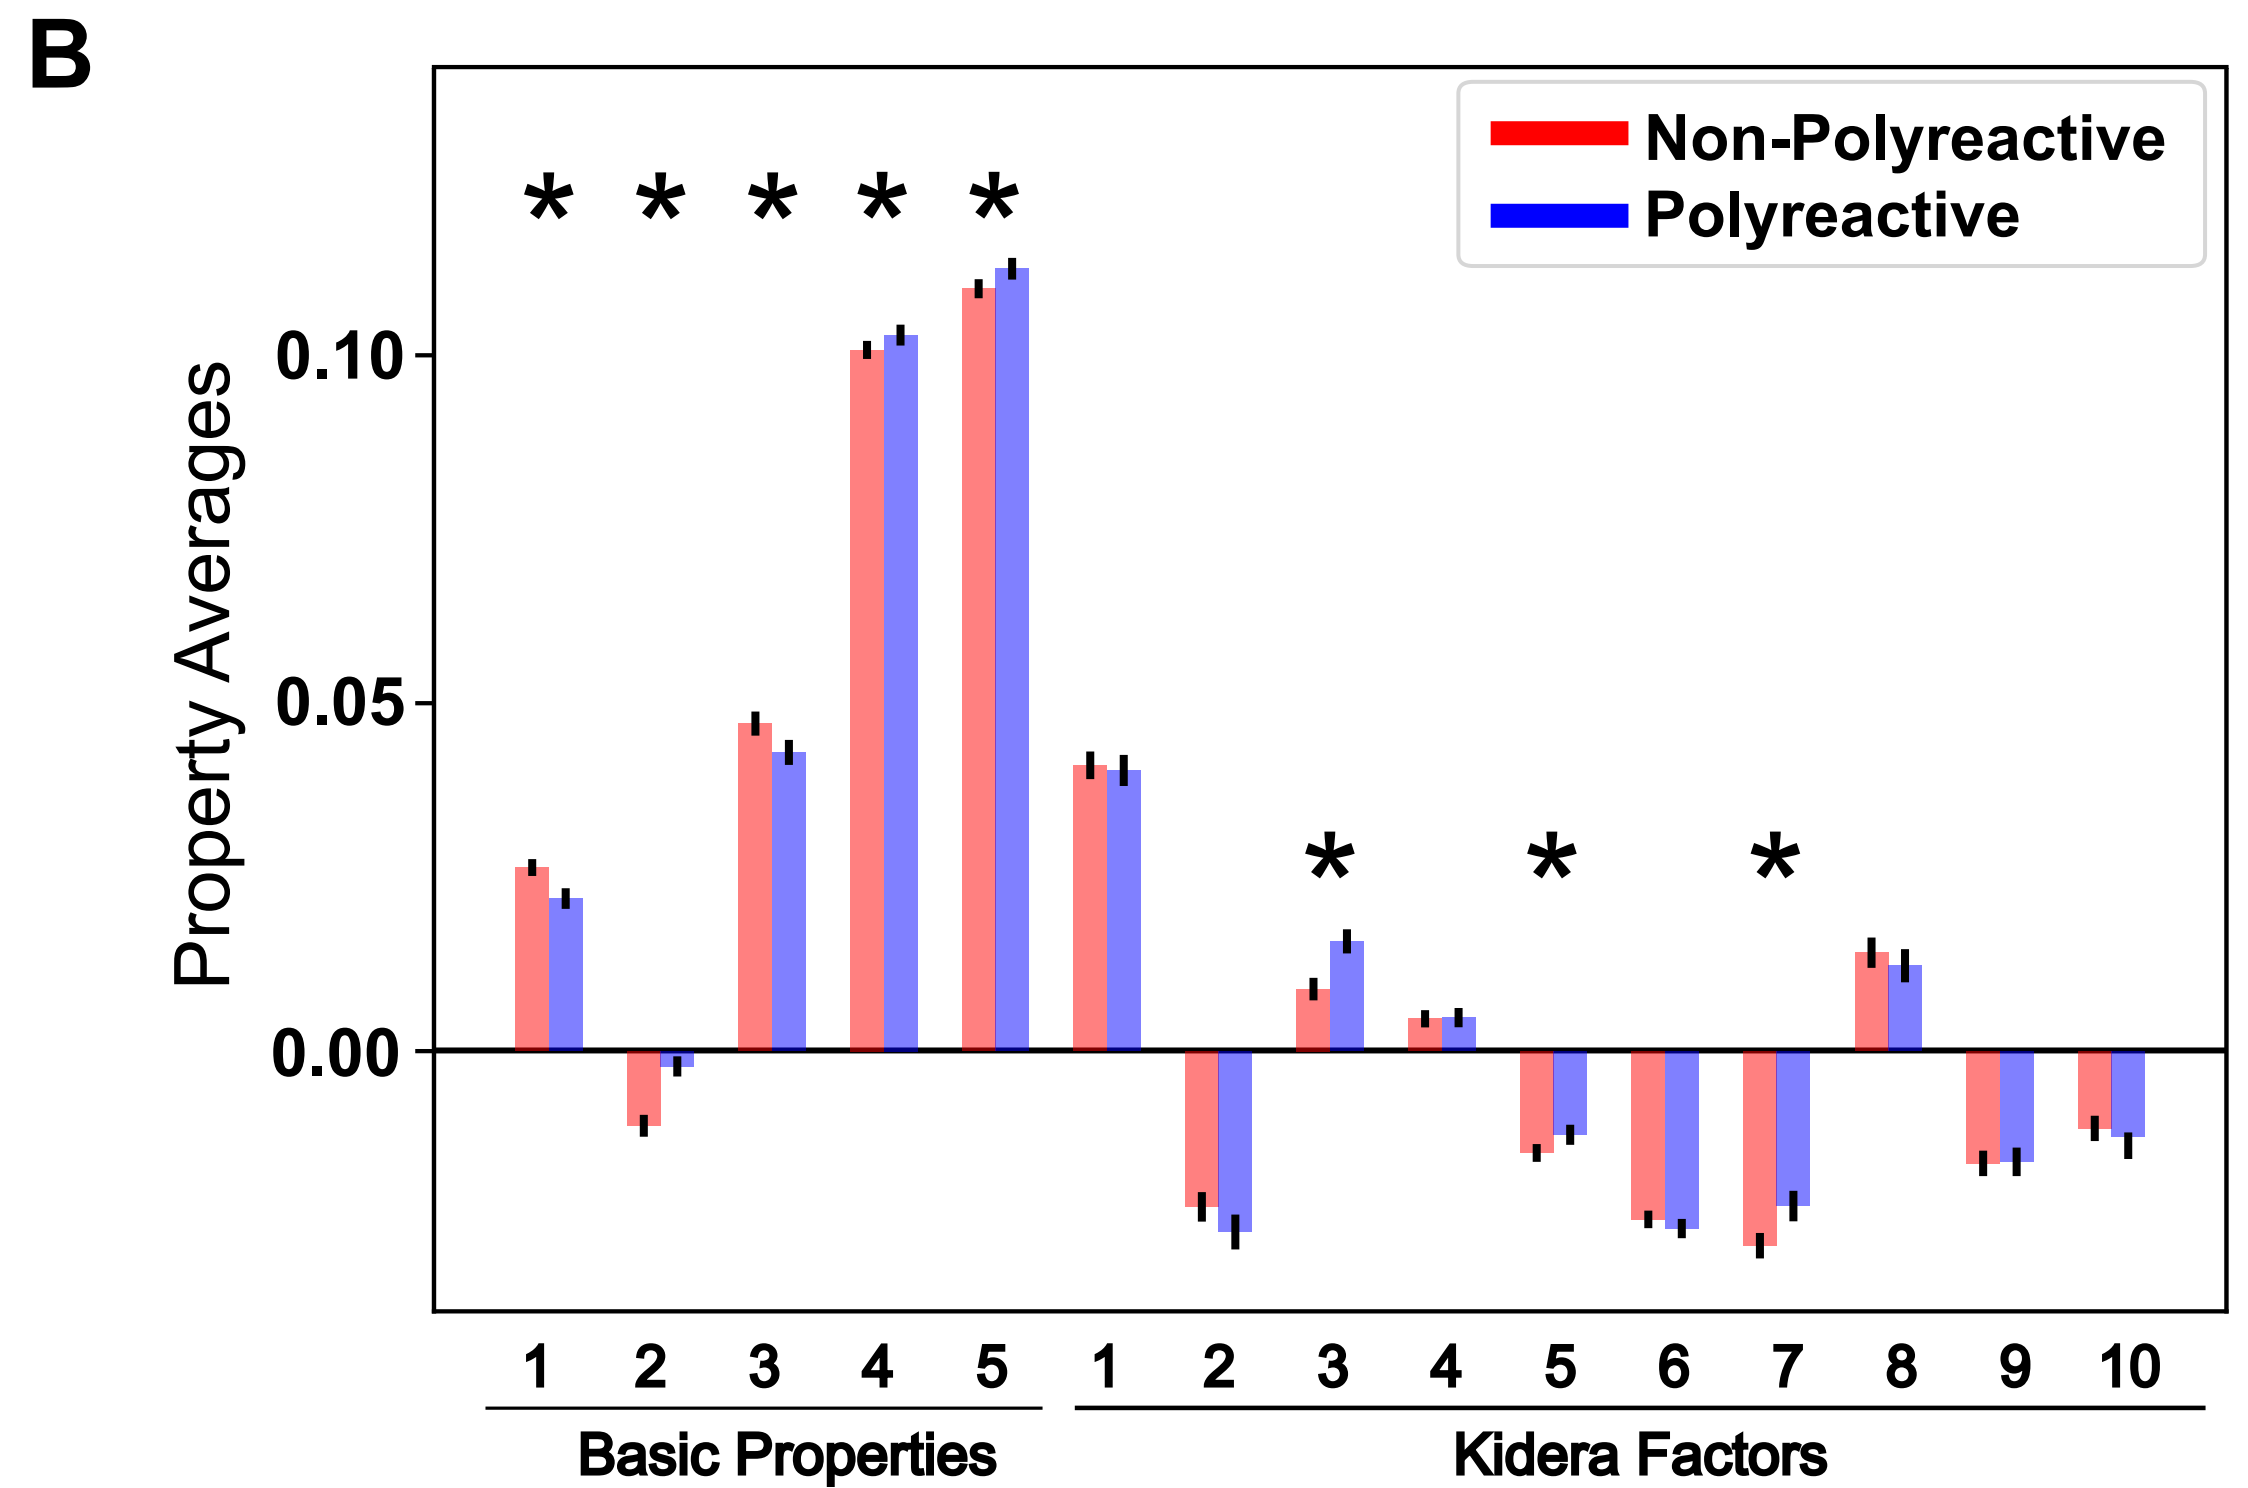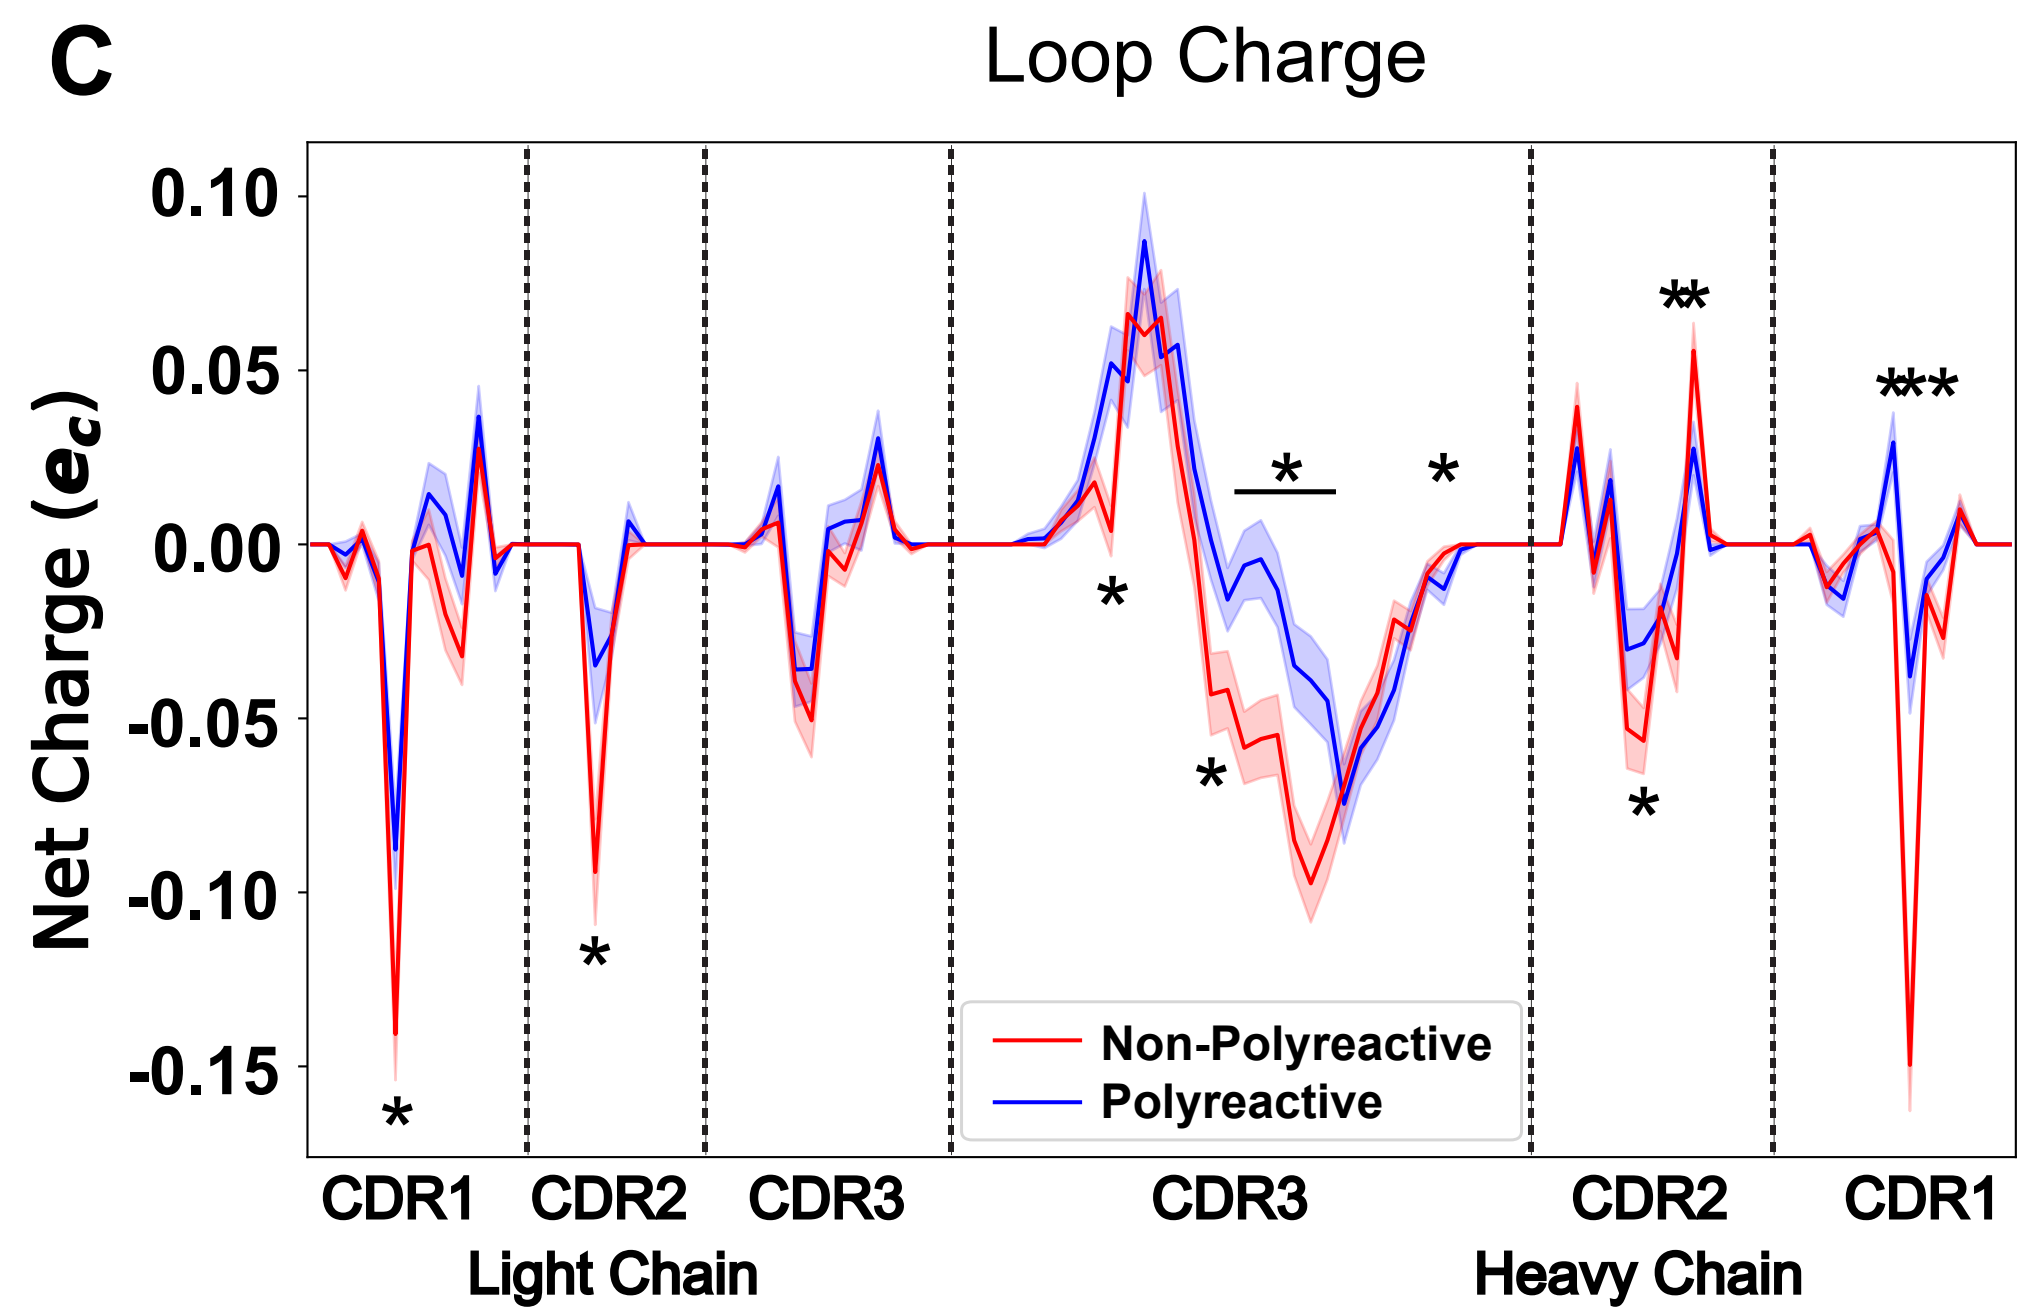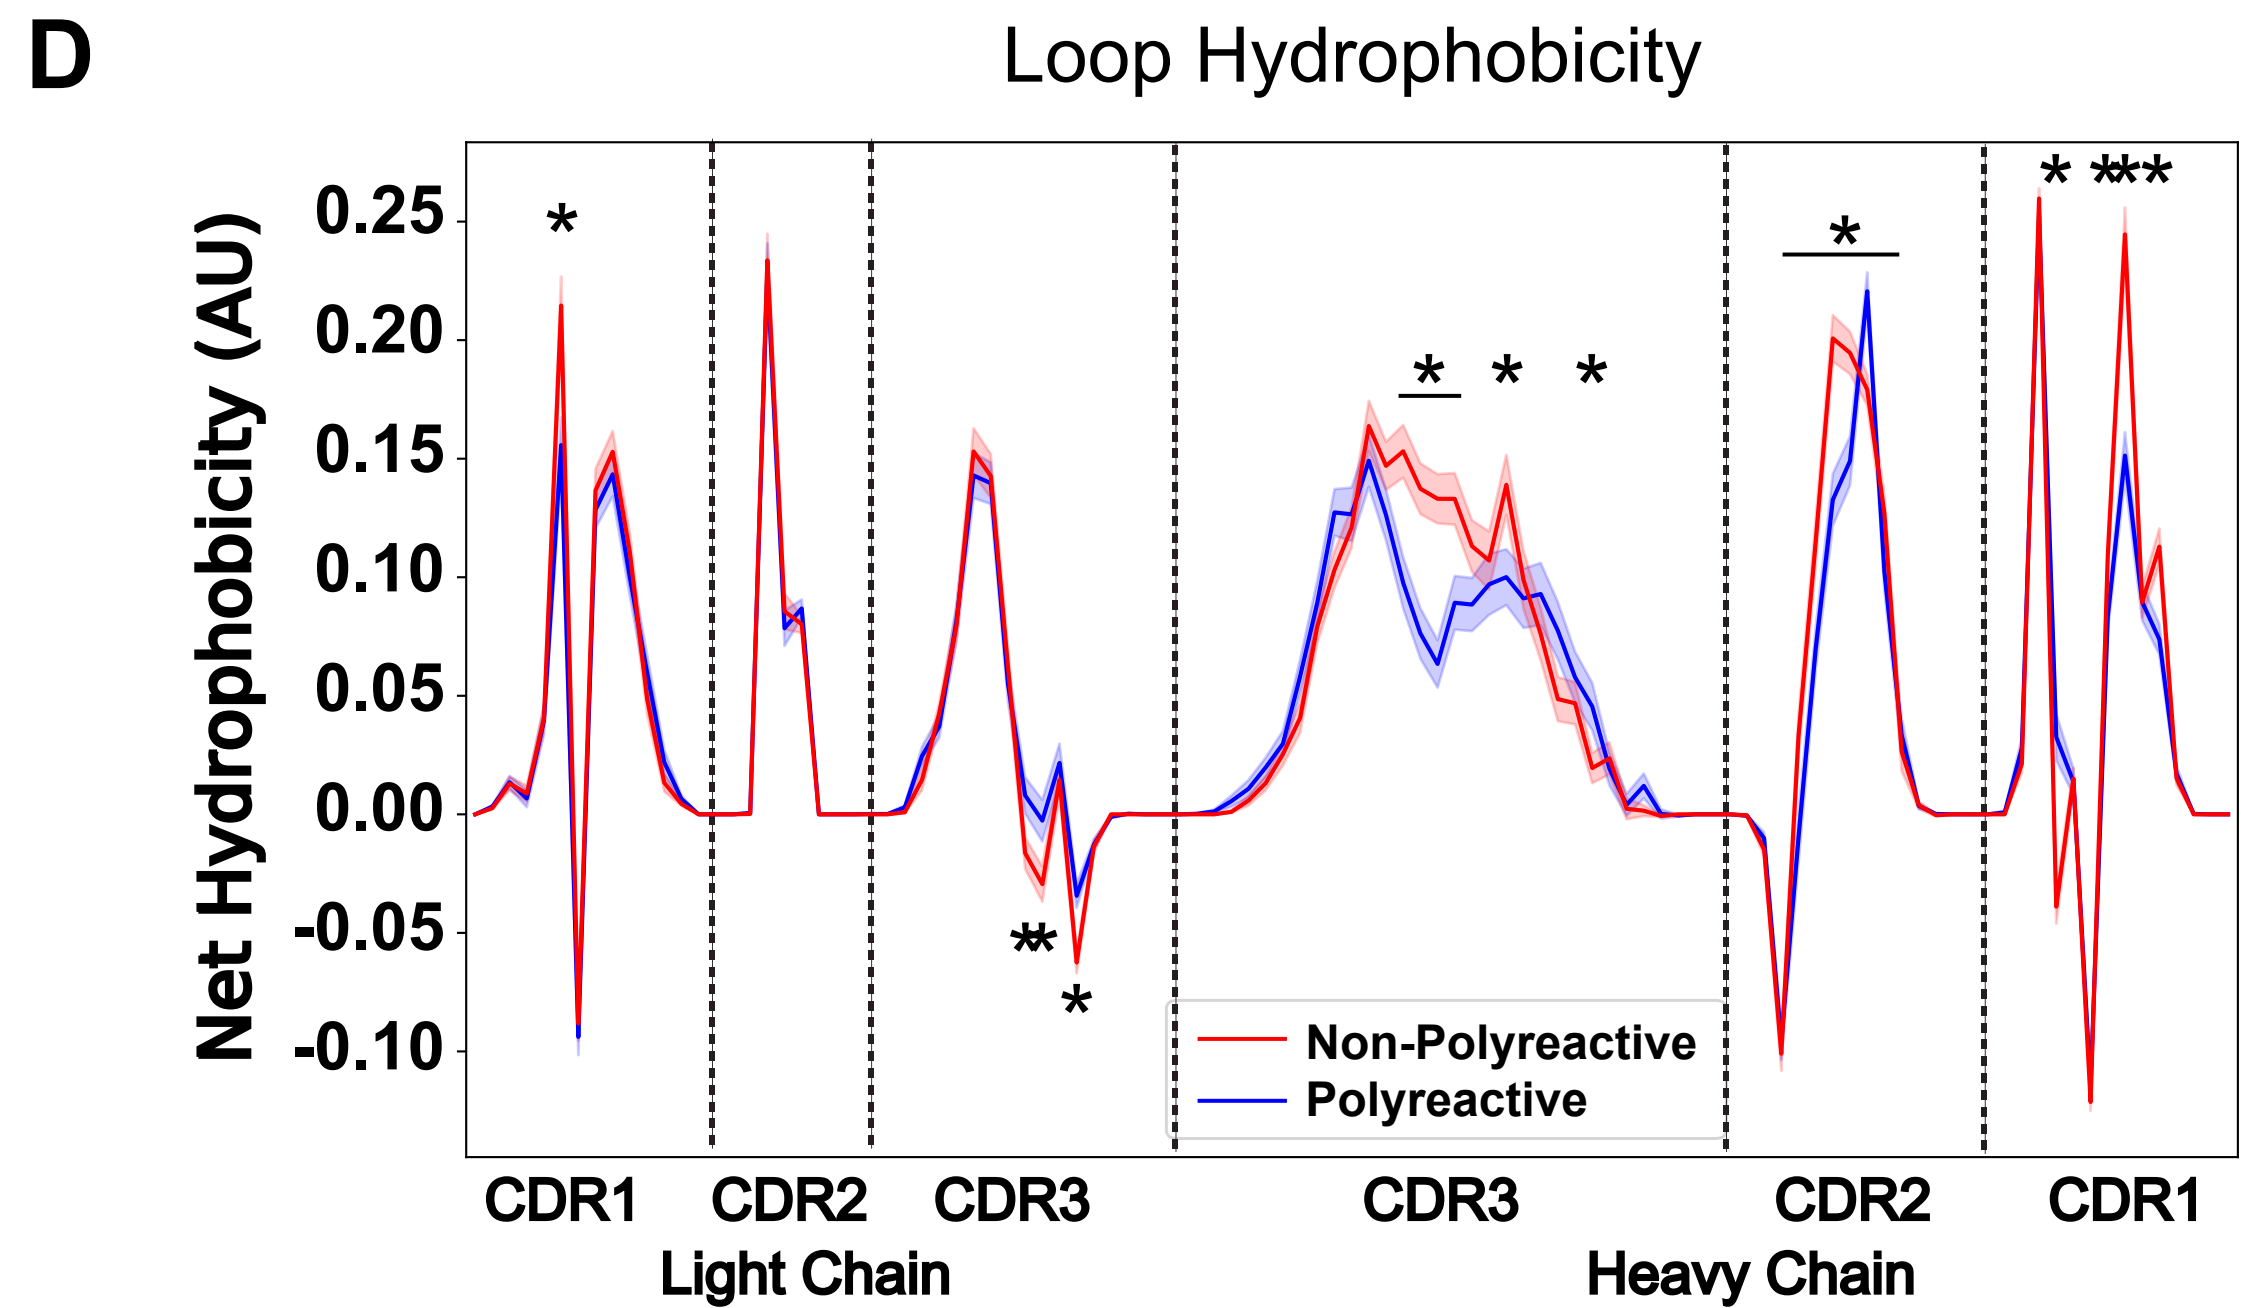

Supplement: supp [file elife-61393-supp-v1.zip]

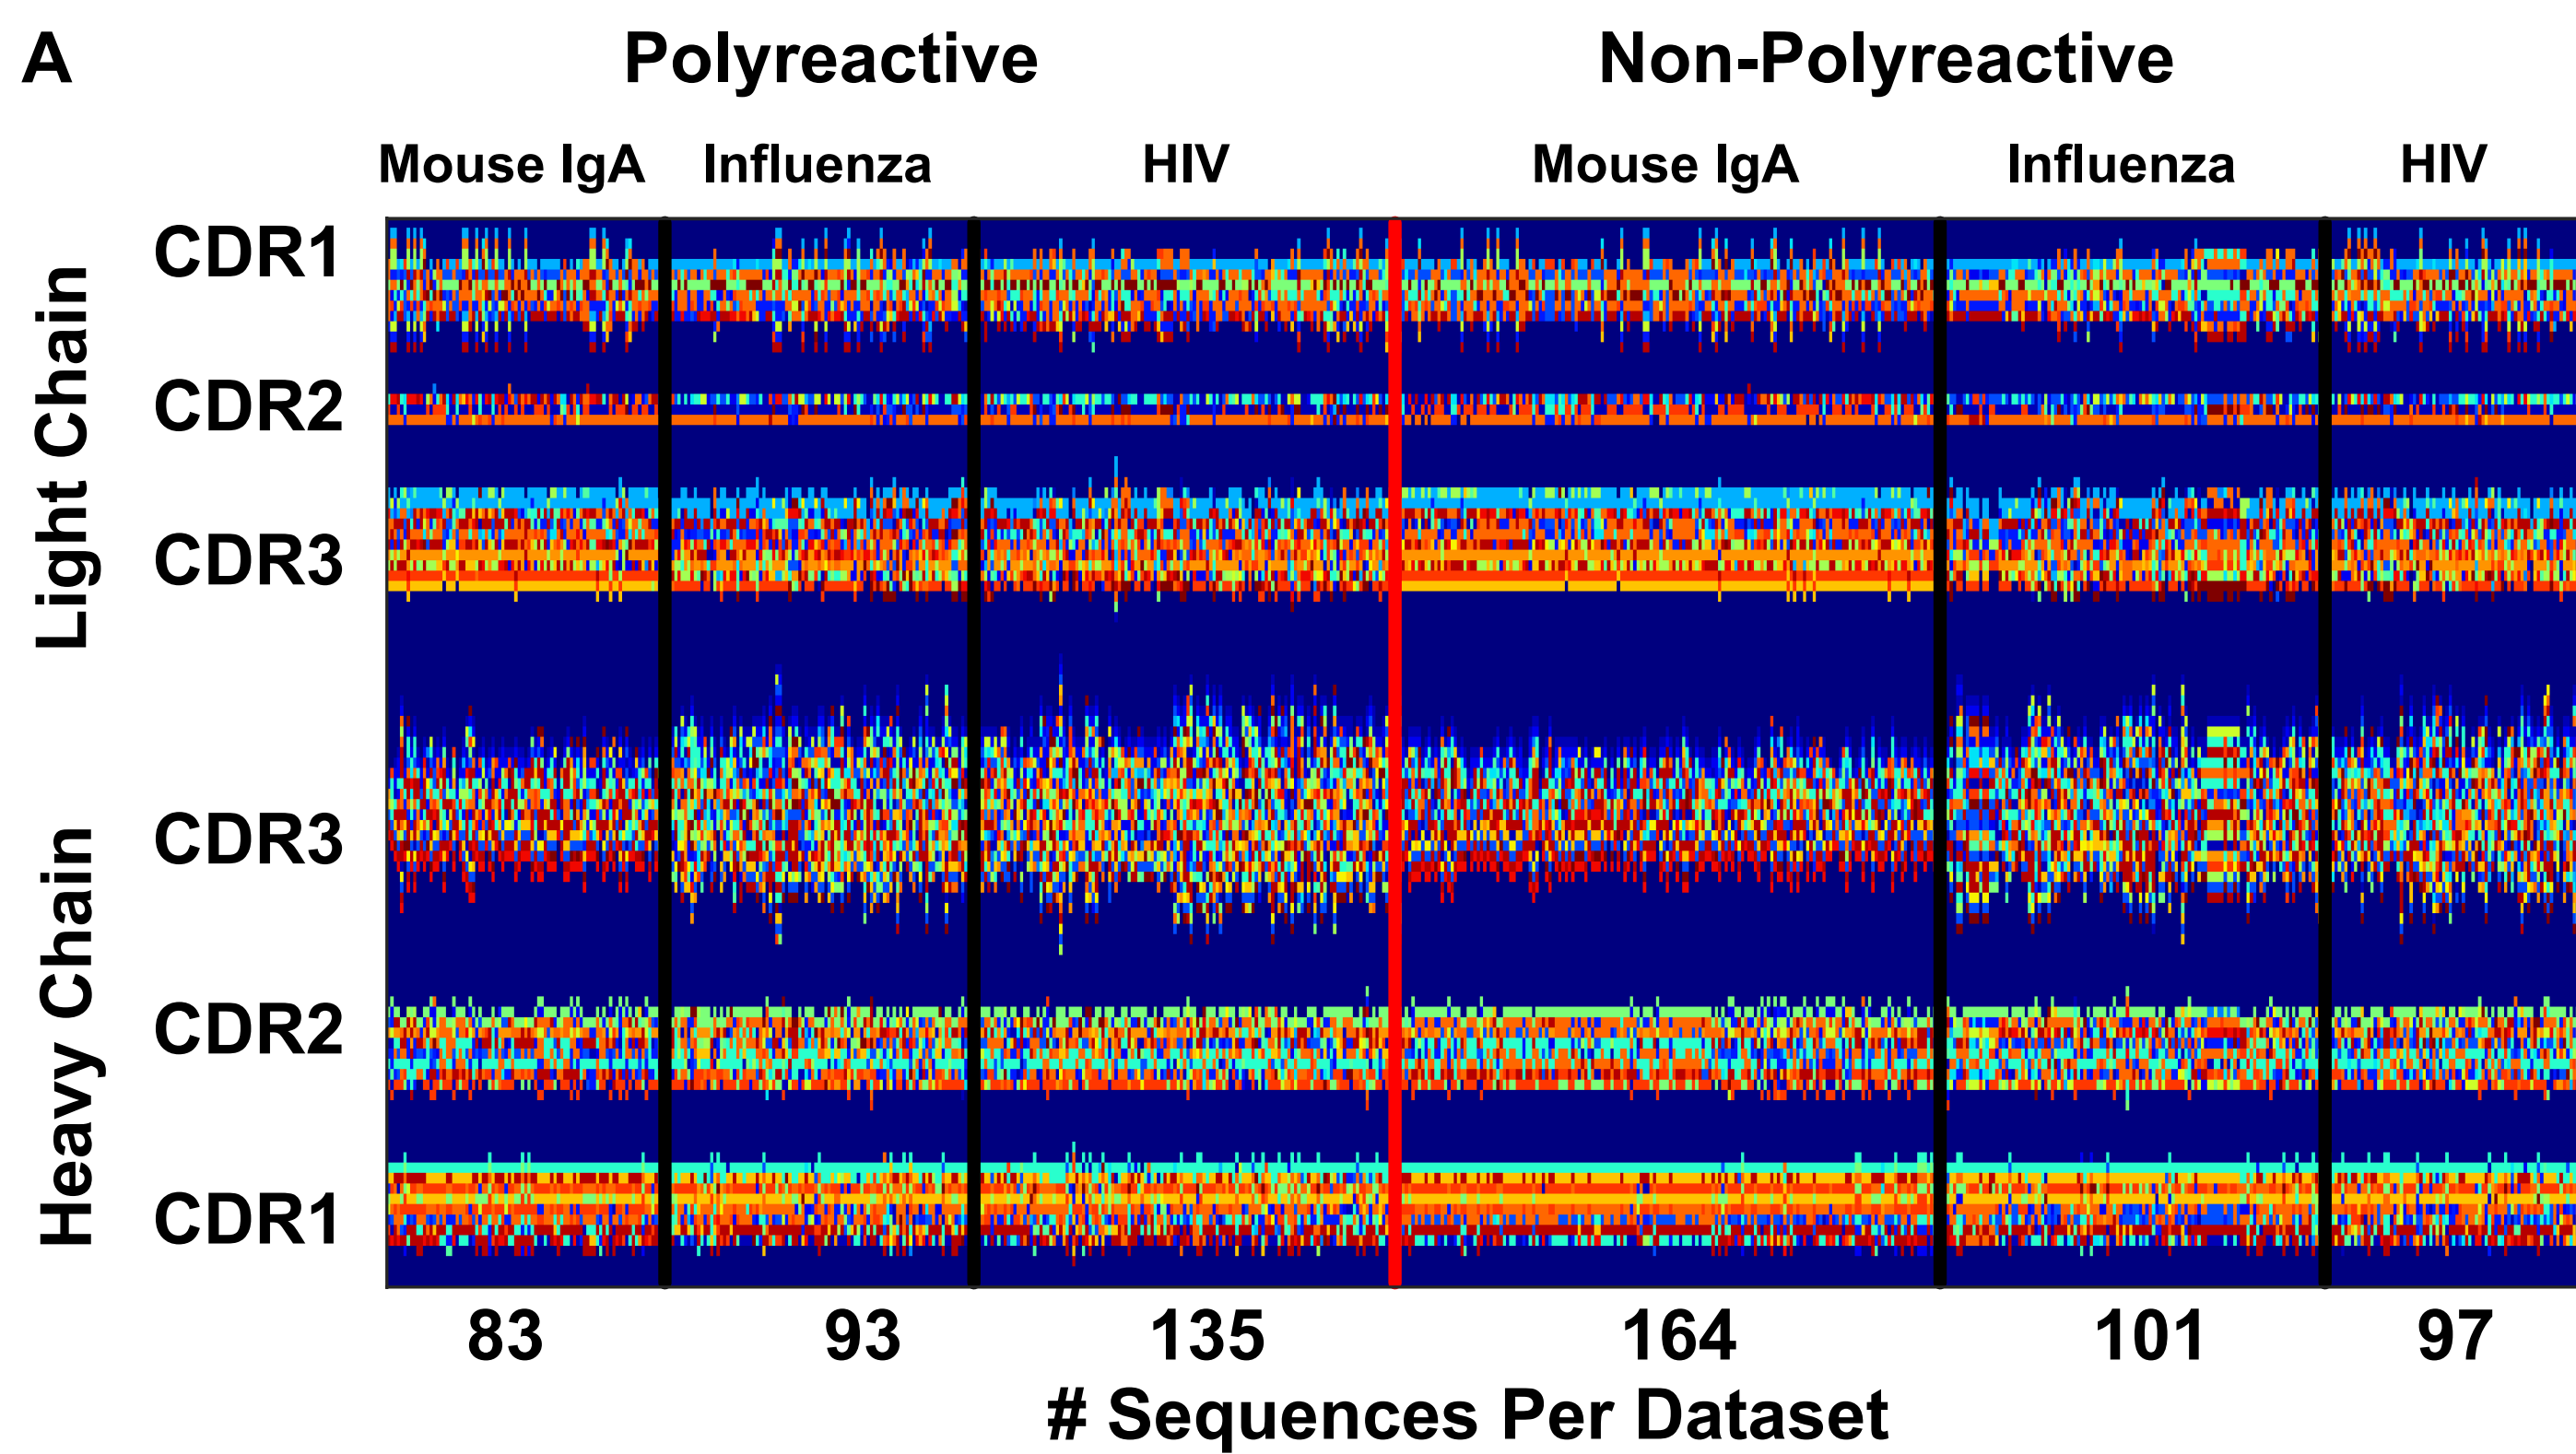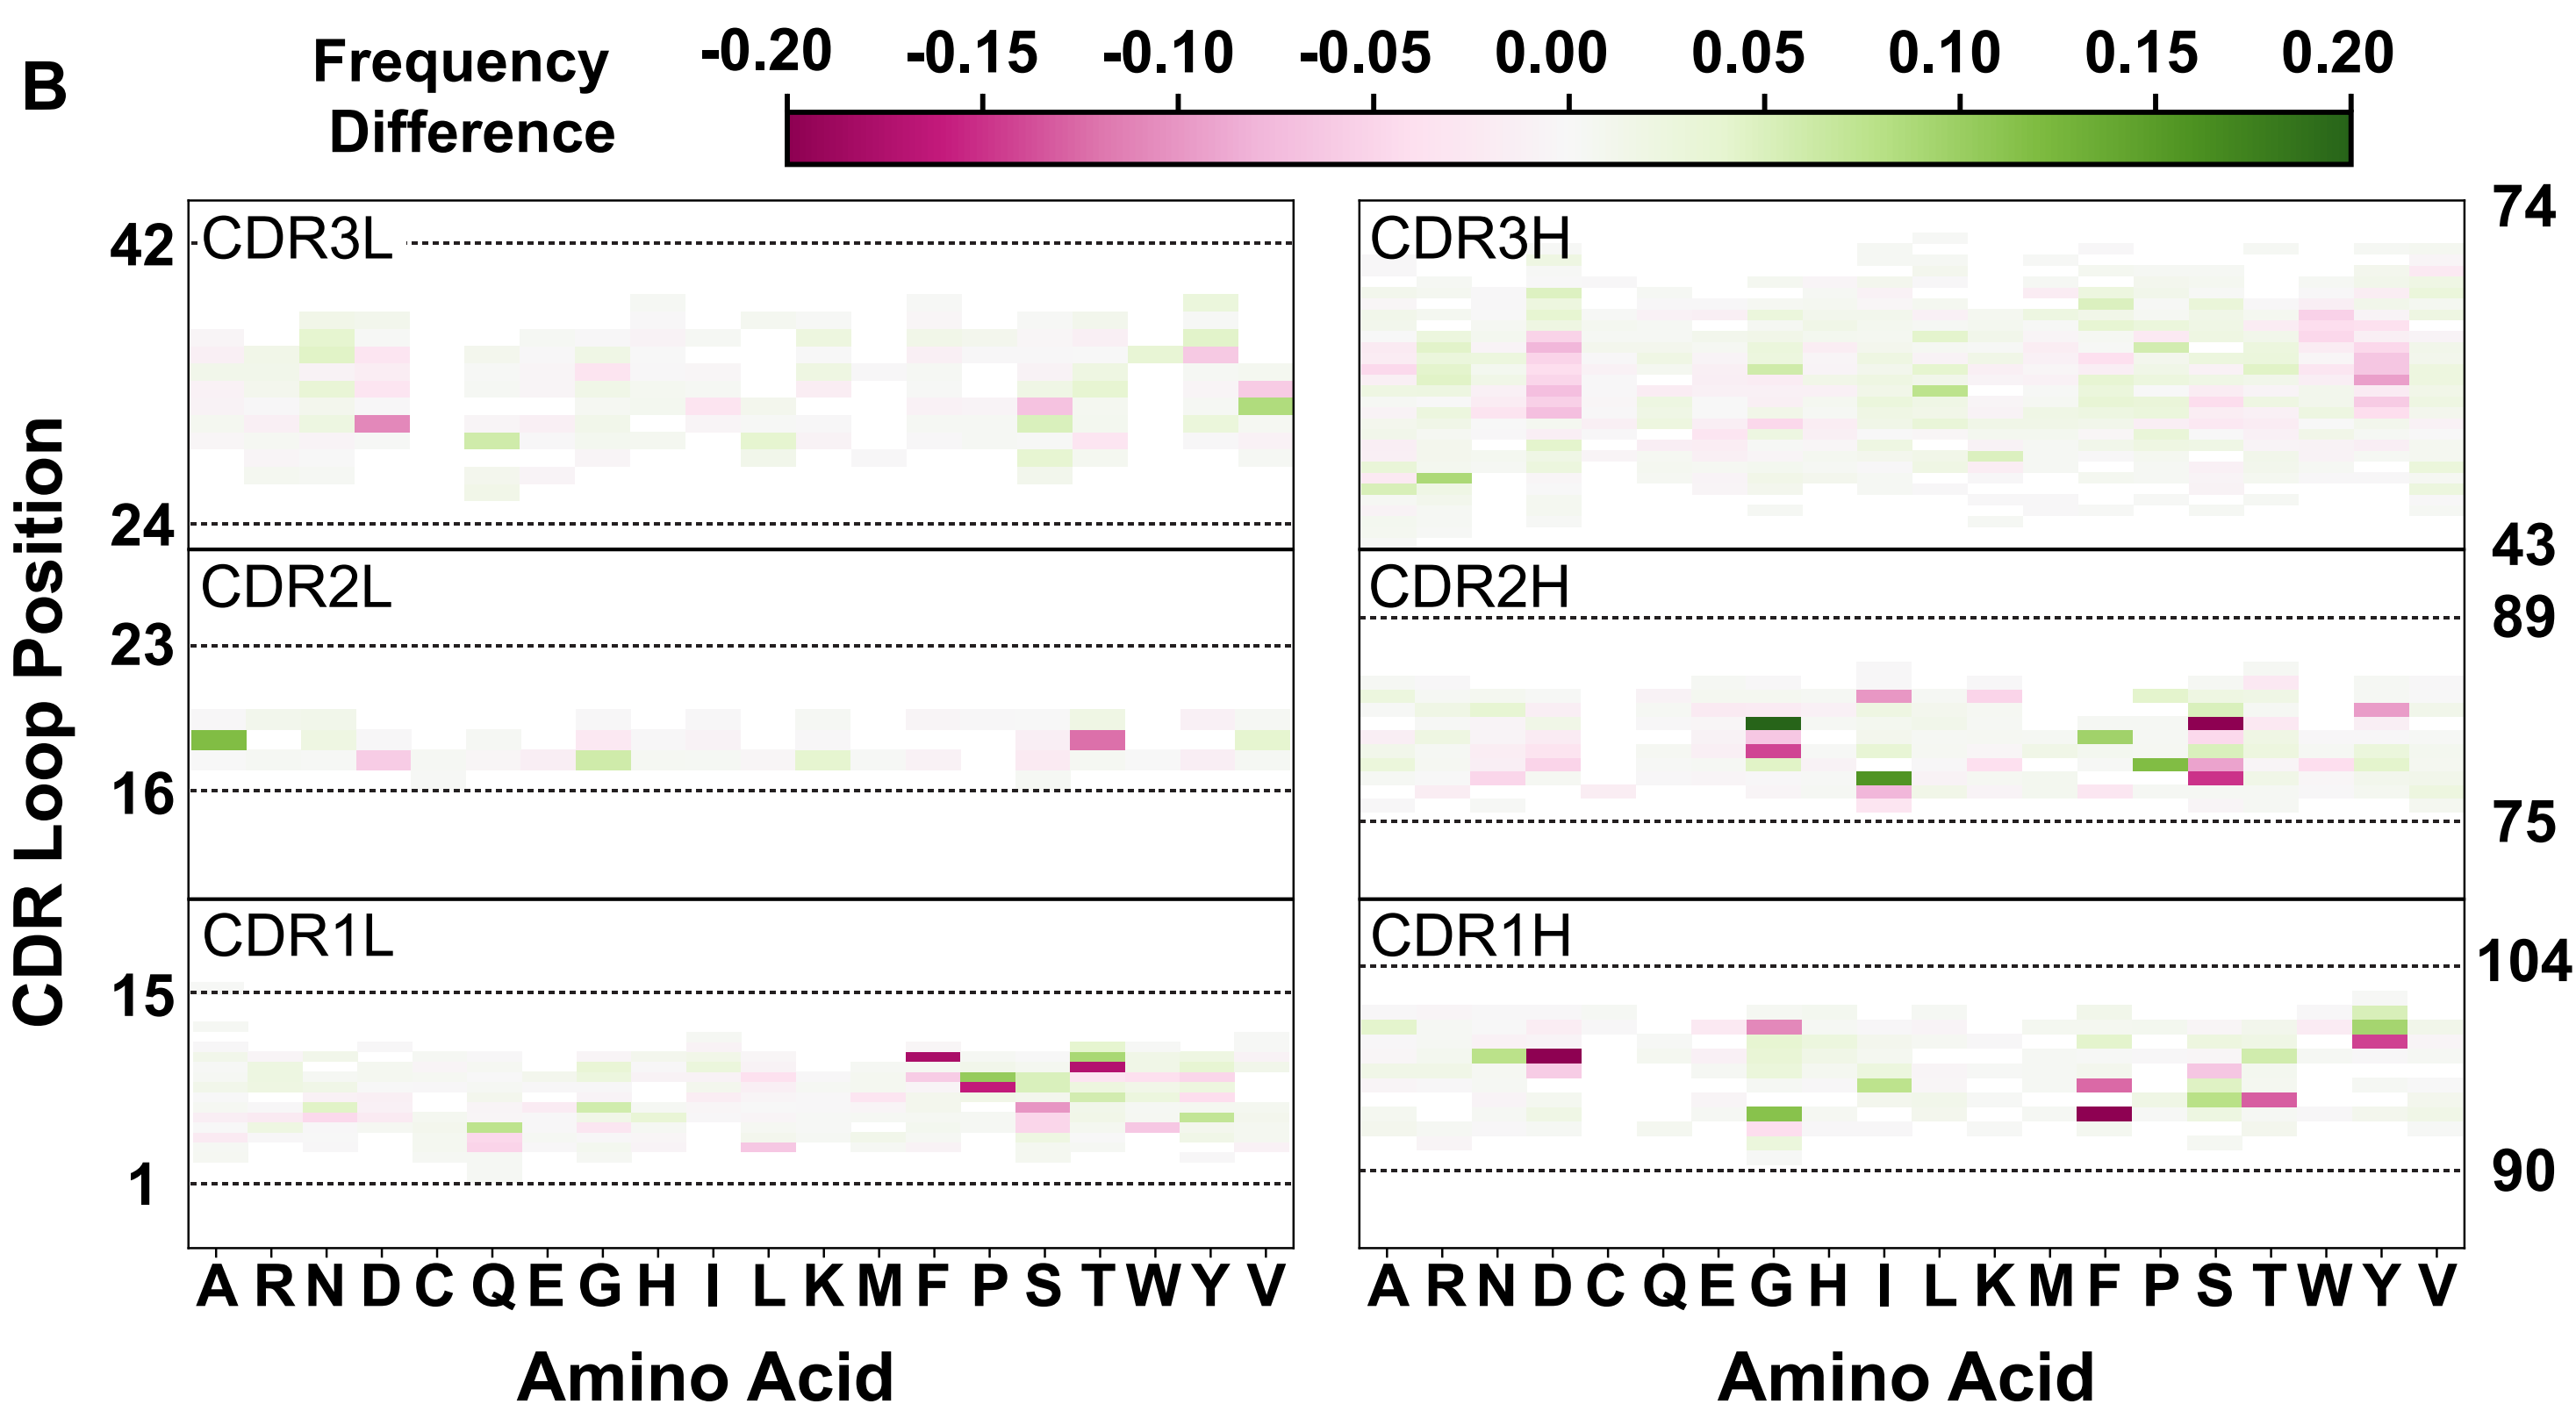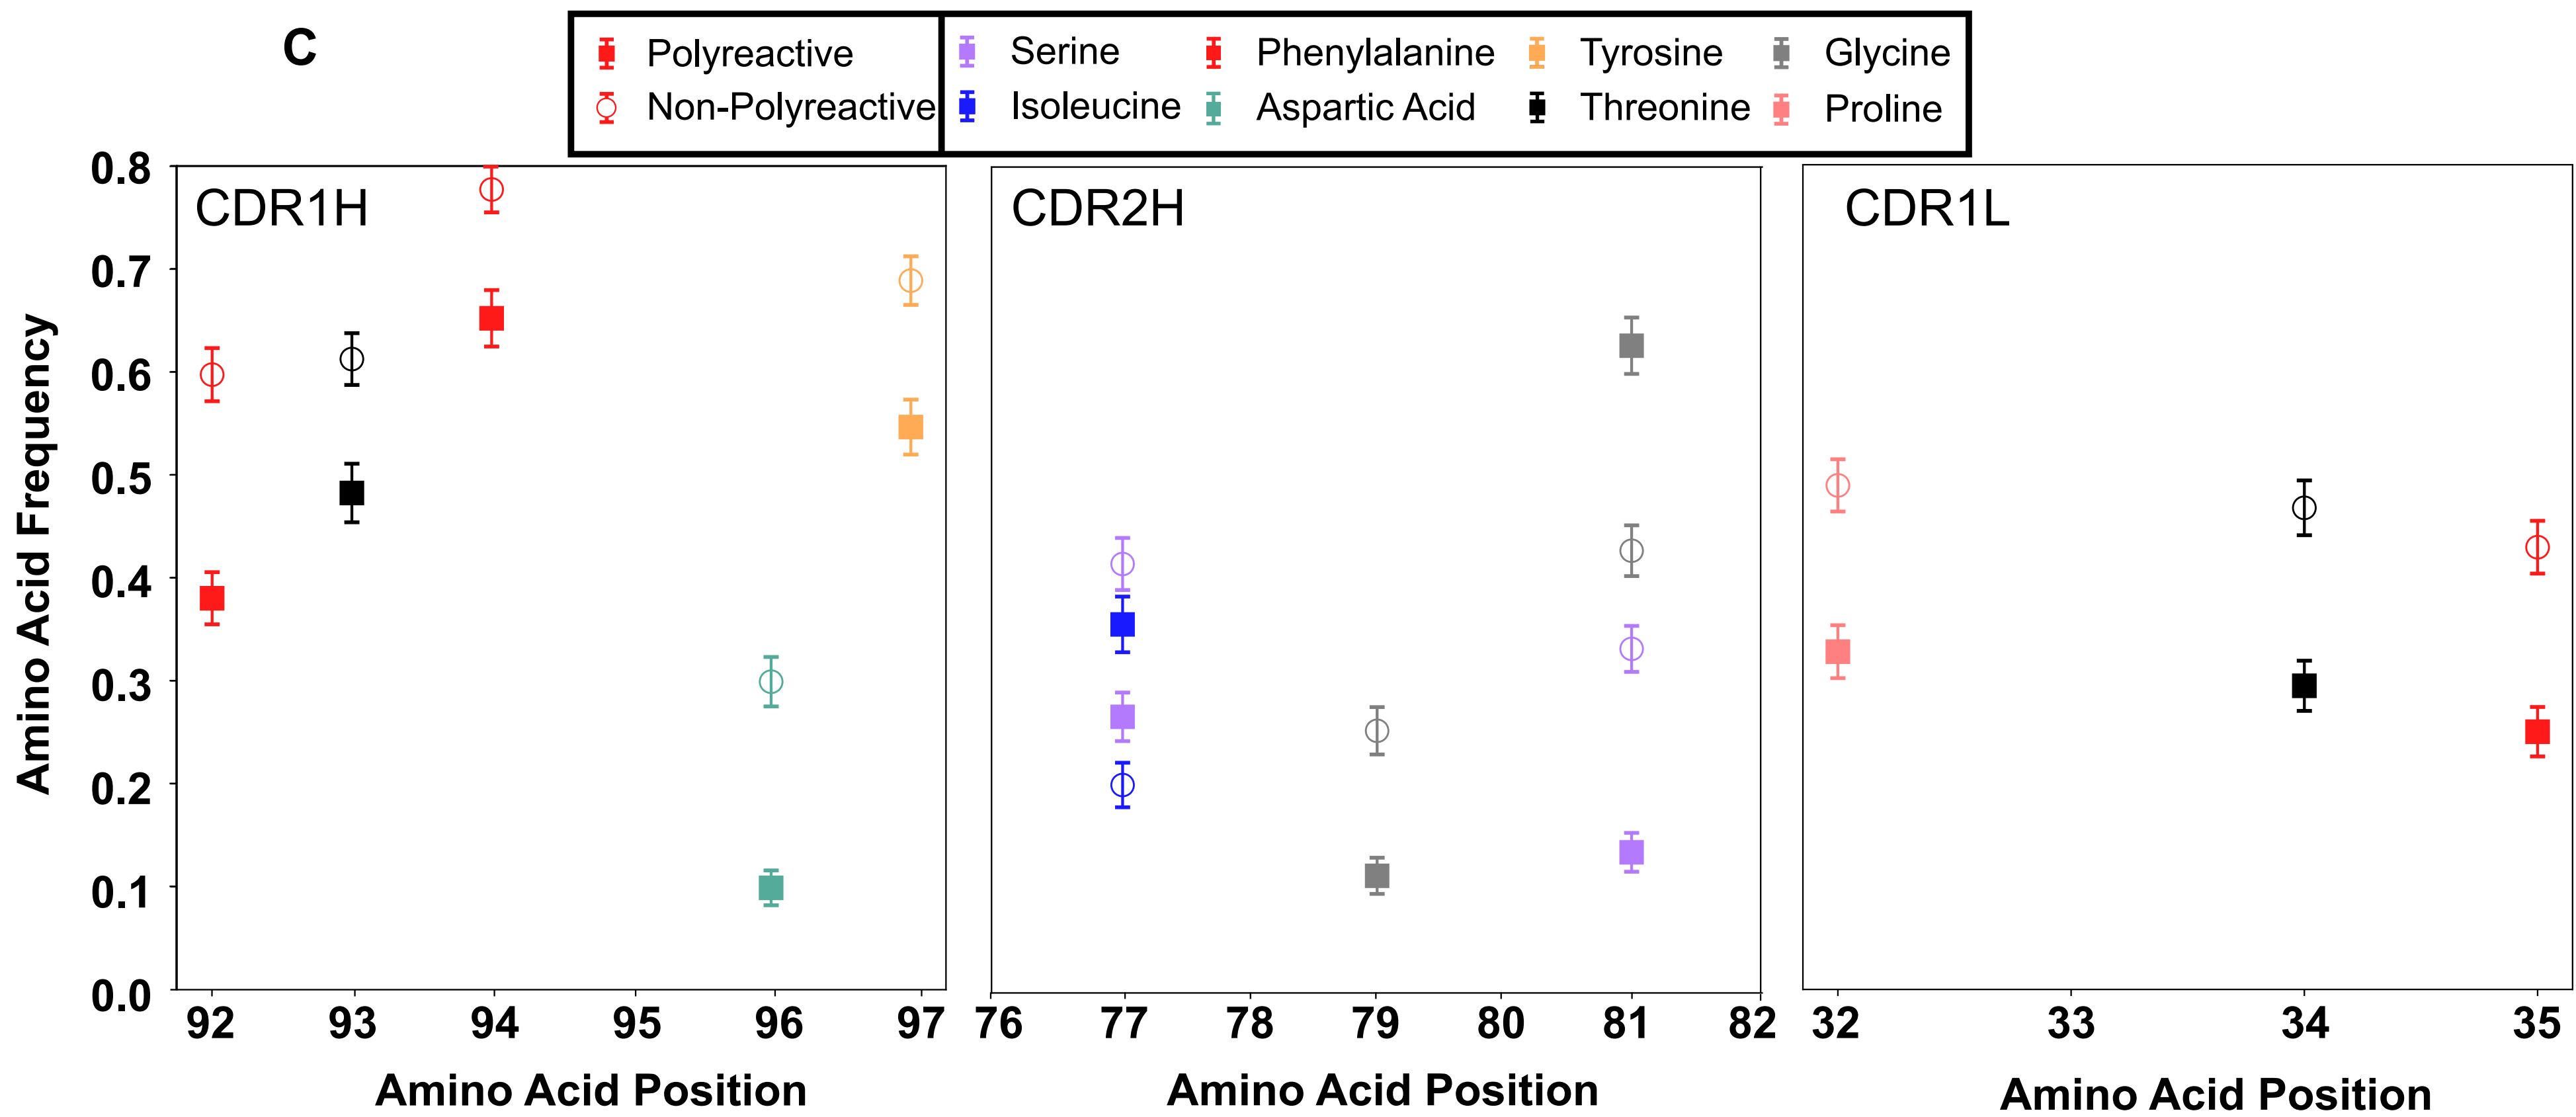

Supplement: supp [file elife-61393-supp-v1.zip]

**A**

Non-Polyreactive Antibodies

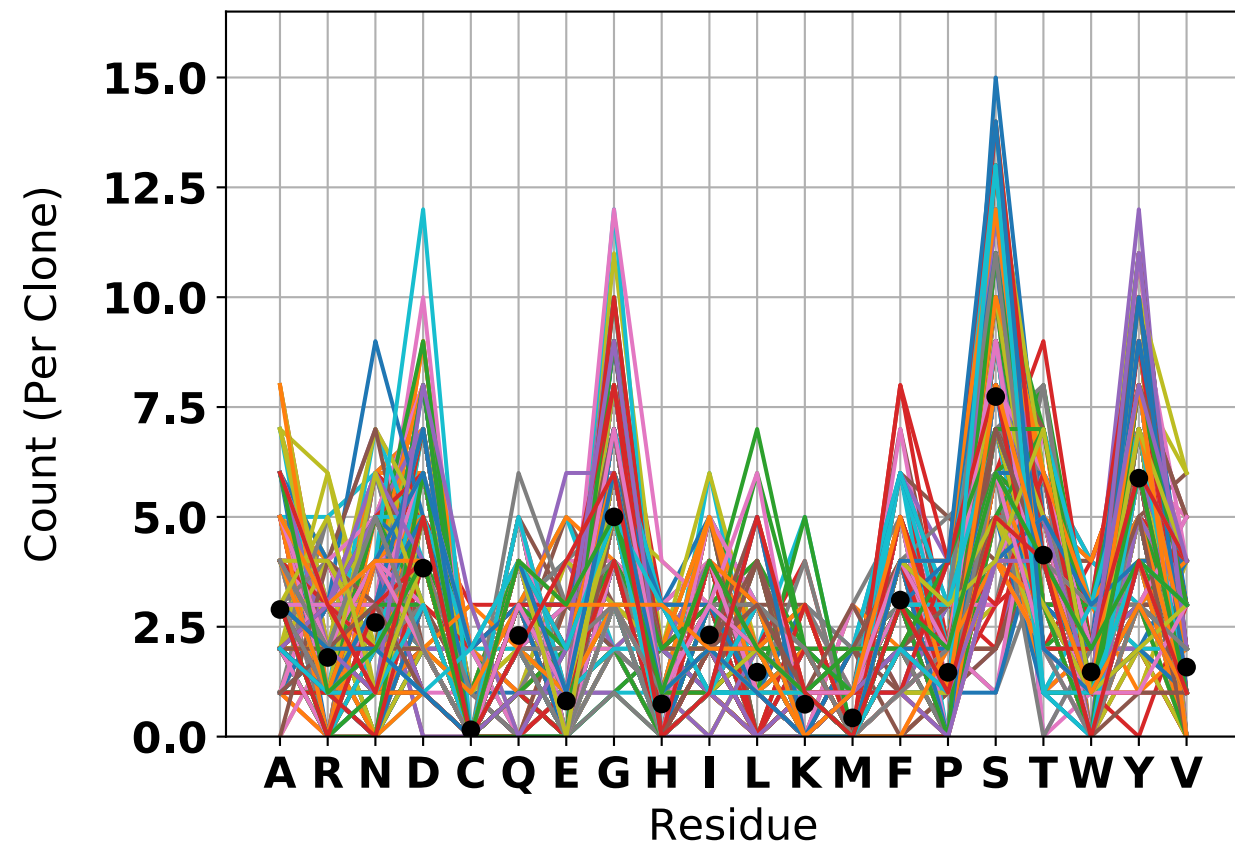**B**

Polyreactive Antibodies

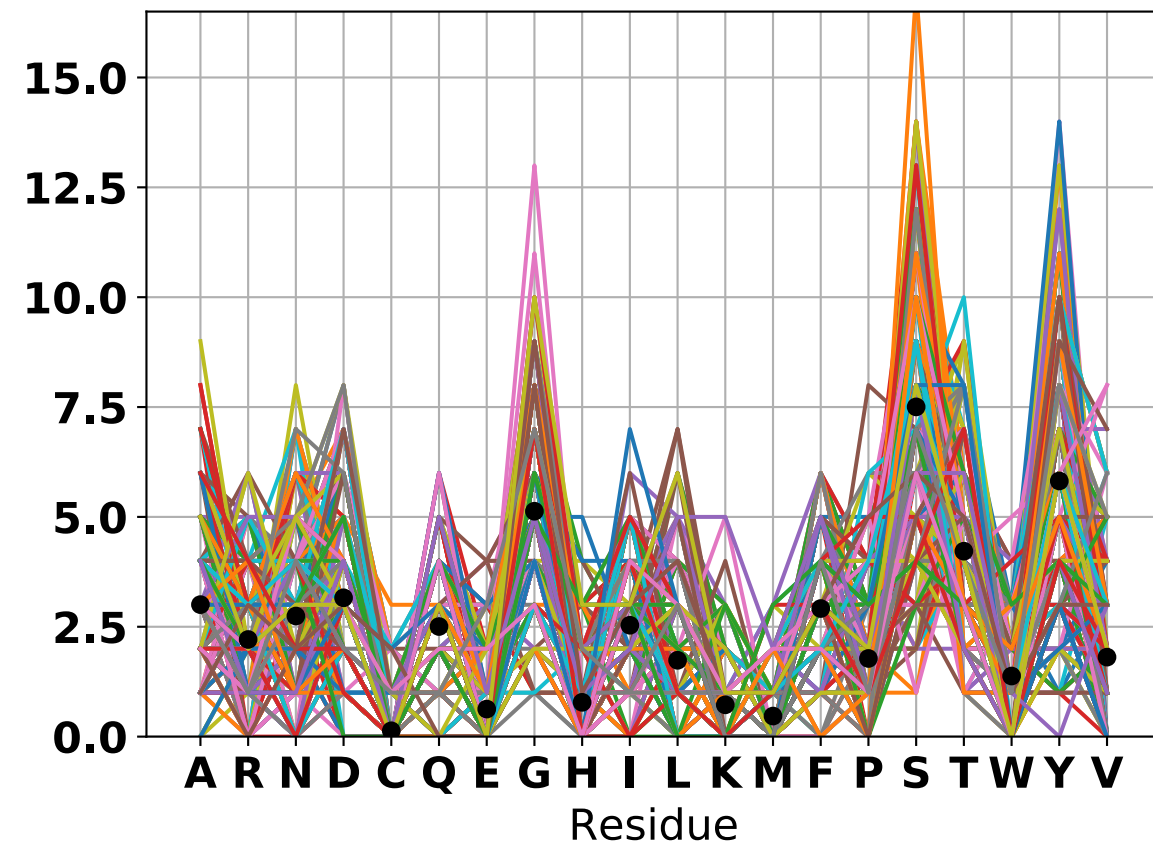

Supplement: supp [file elife-61393-supp-v1.zip]

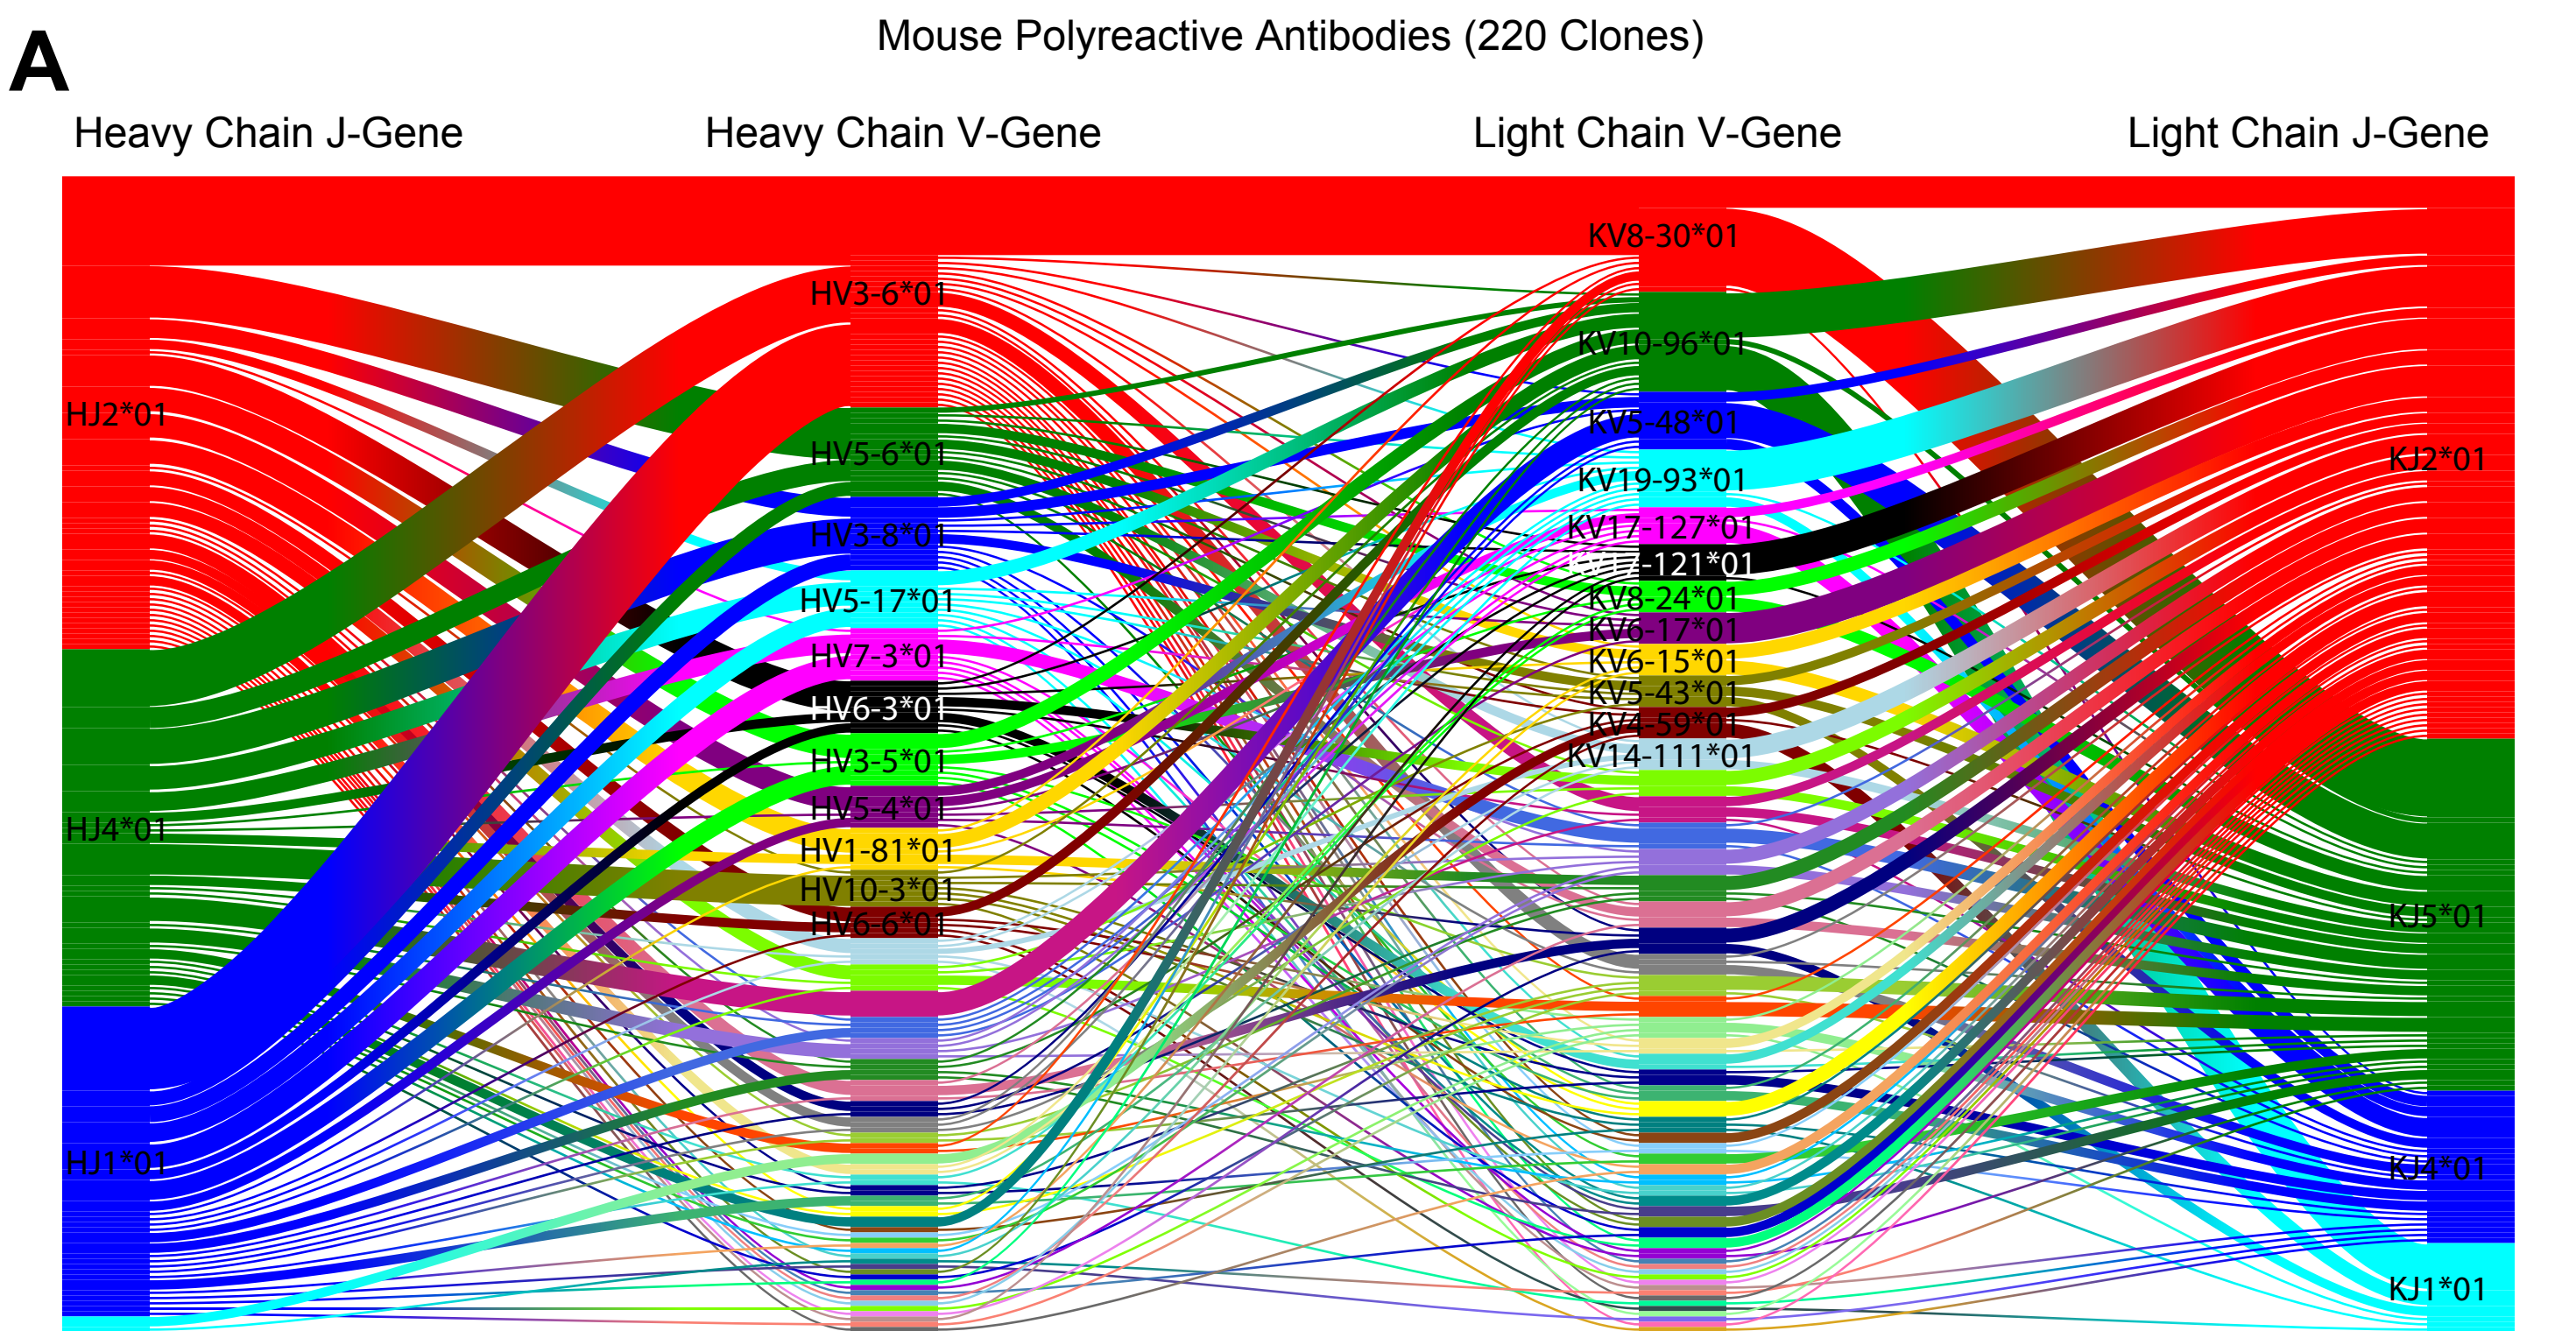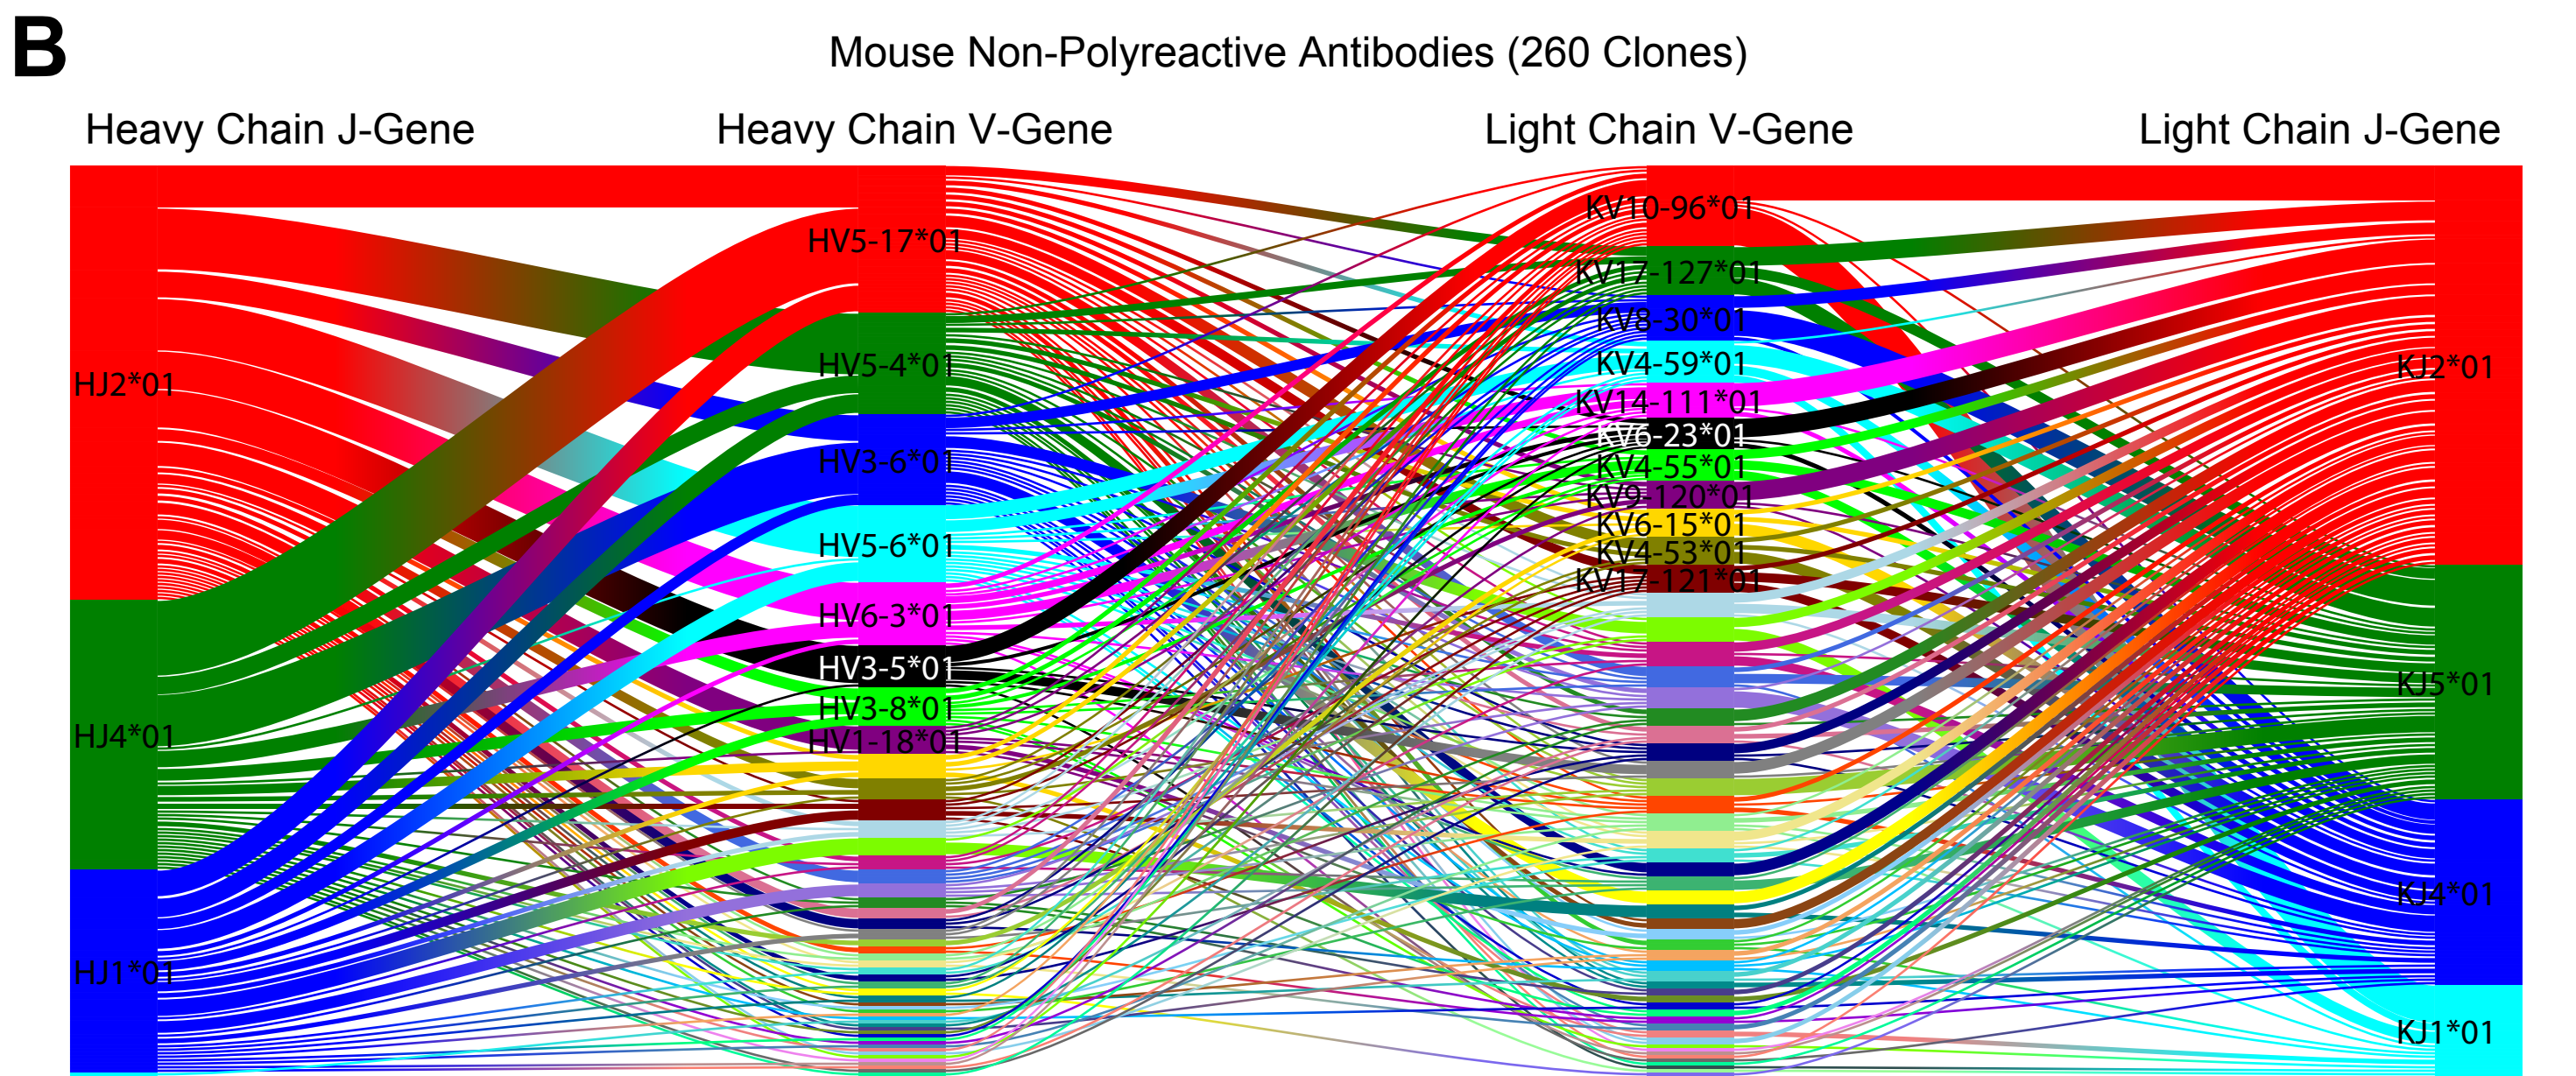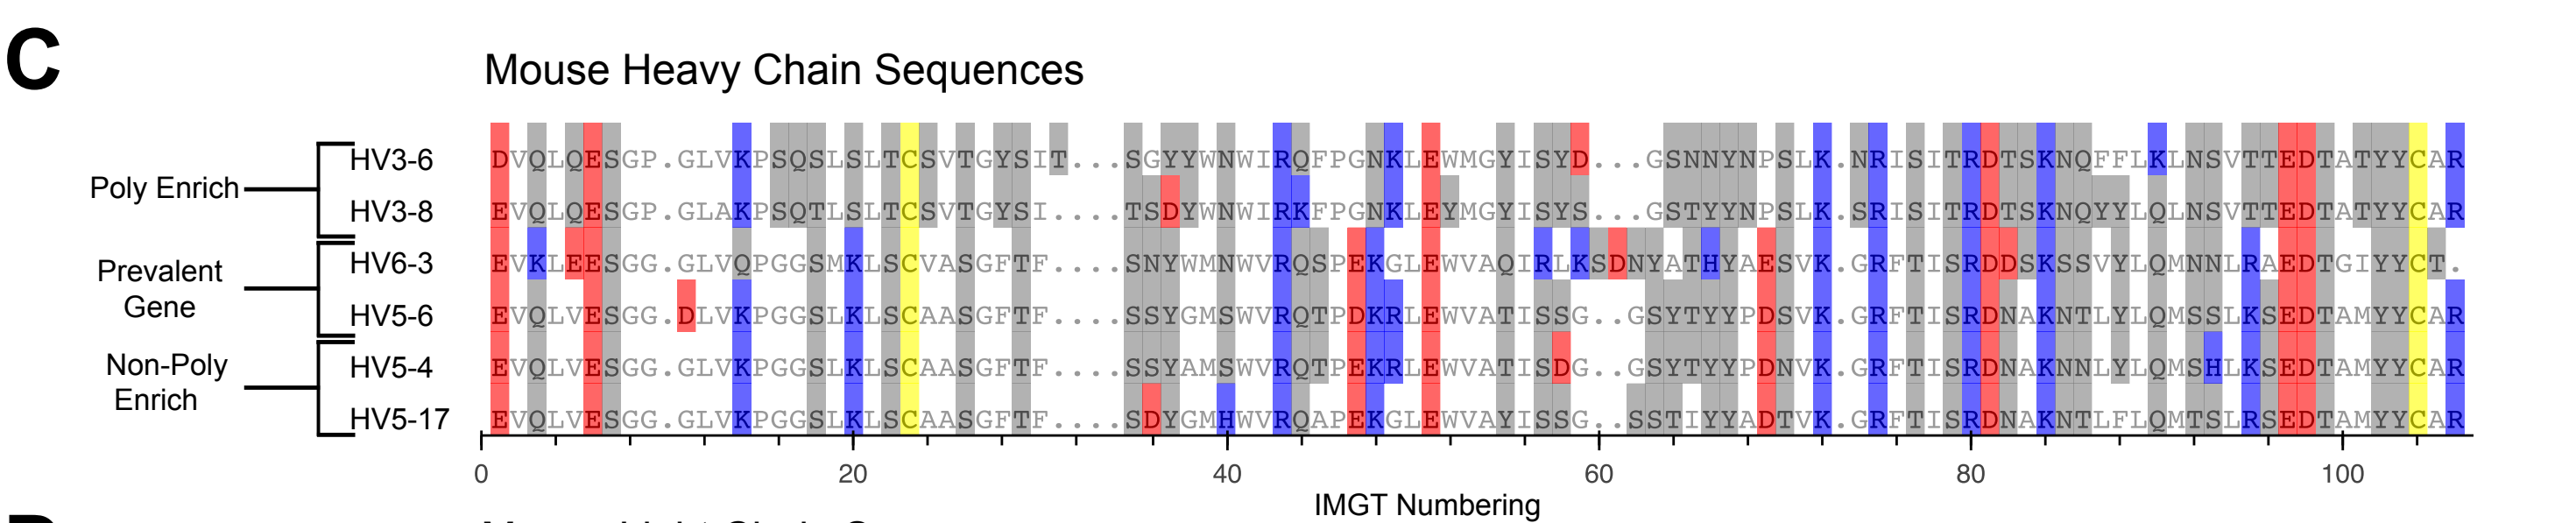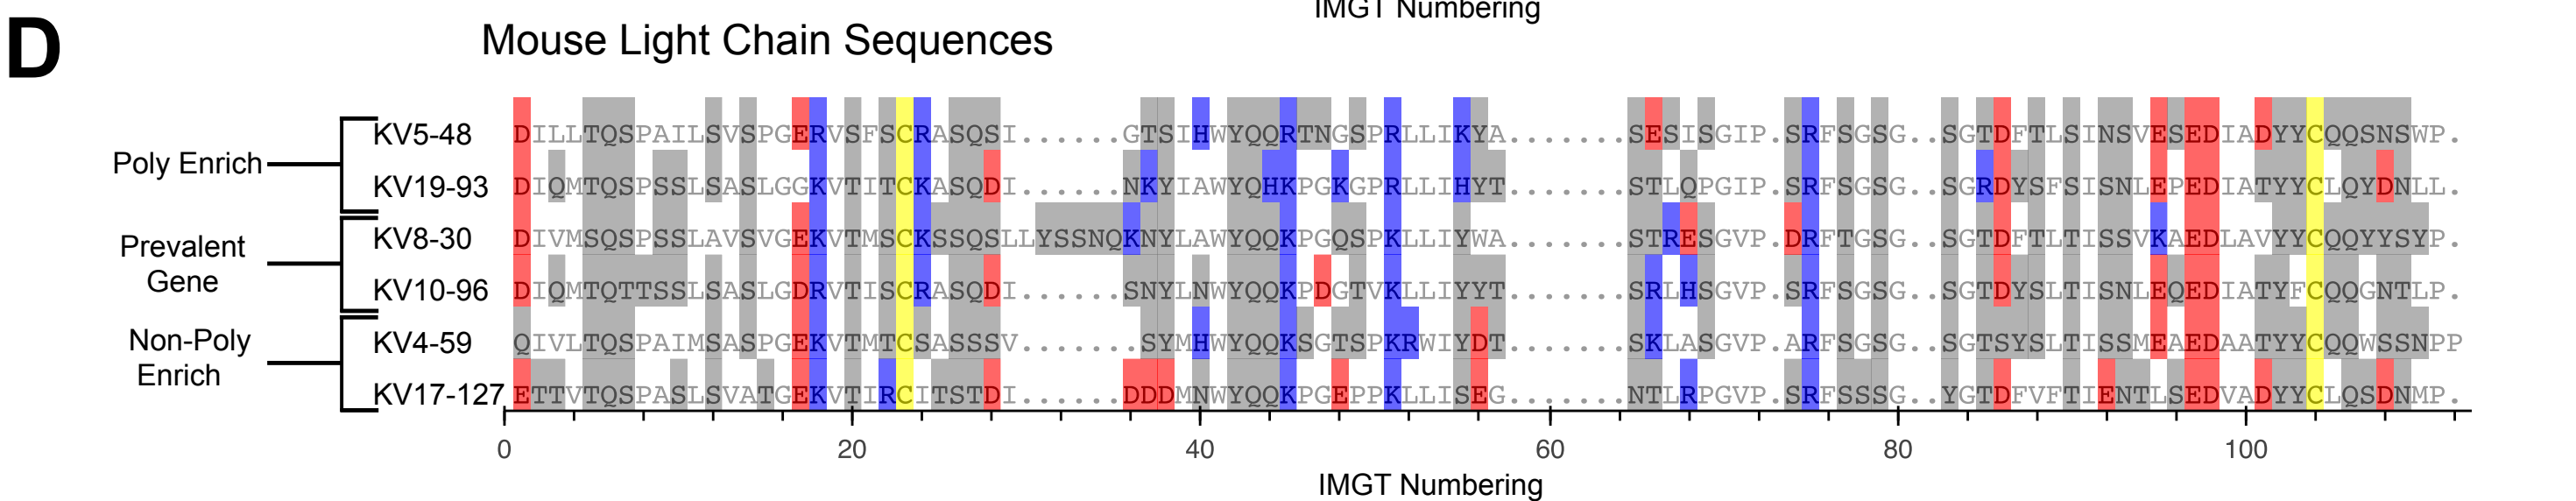

Supplement: supp [file elife-61393-supp-v1.zip › elife_poa_e61393_Figure_1_figure_supplement_2.pdf]

IMGT 1-14 (FR1)

IMGT 47-59 (FR2)

IMGT 78-91 (FR3)

Poly Enrich

Prevalent  
Gene

Non-Poly  
Enrich

HV1-46

HV4-59

HV1-69

HV3-23

HV3-7

HV3-9

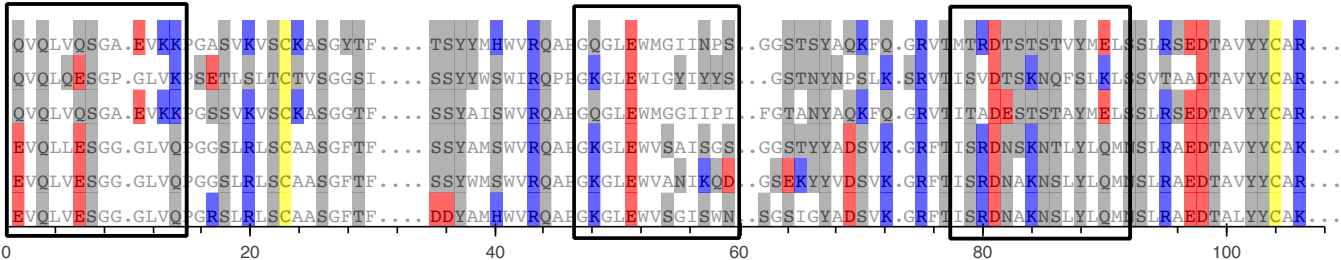

Supplement: supp [file elife-61393-supp-v1.zip › elife_poa_e61393_Figure_1_figure_supplement_4.pdf]

**A**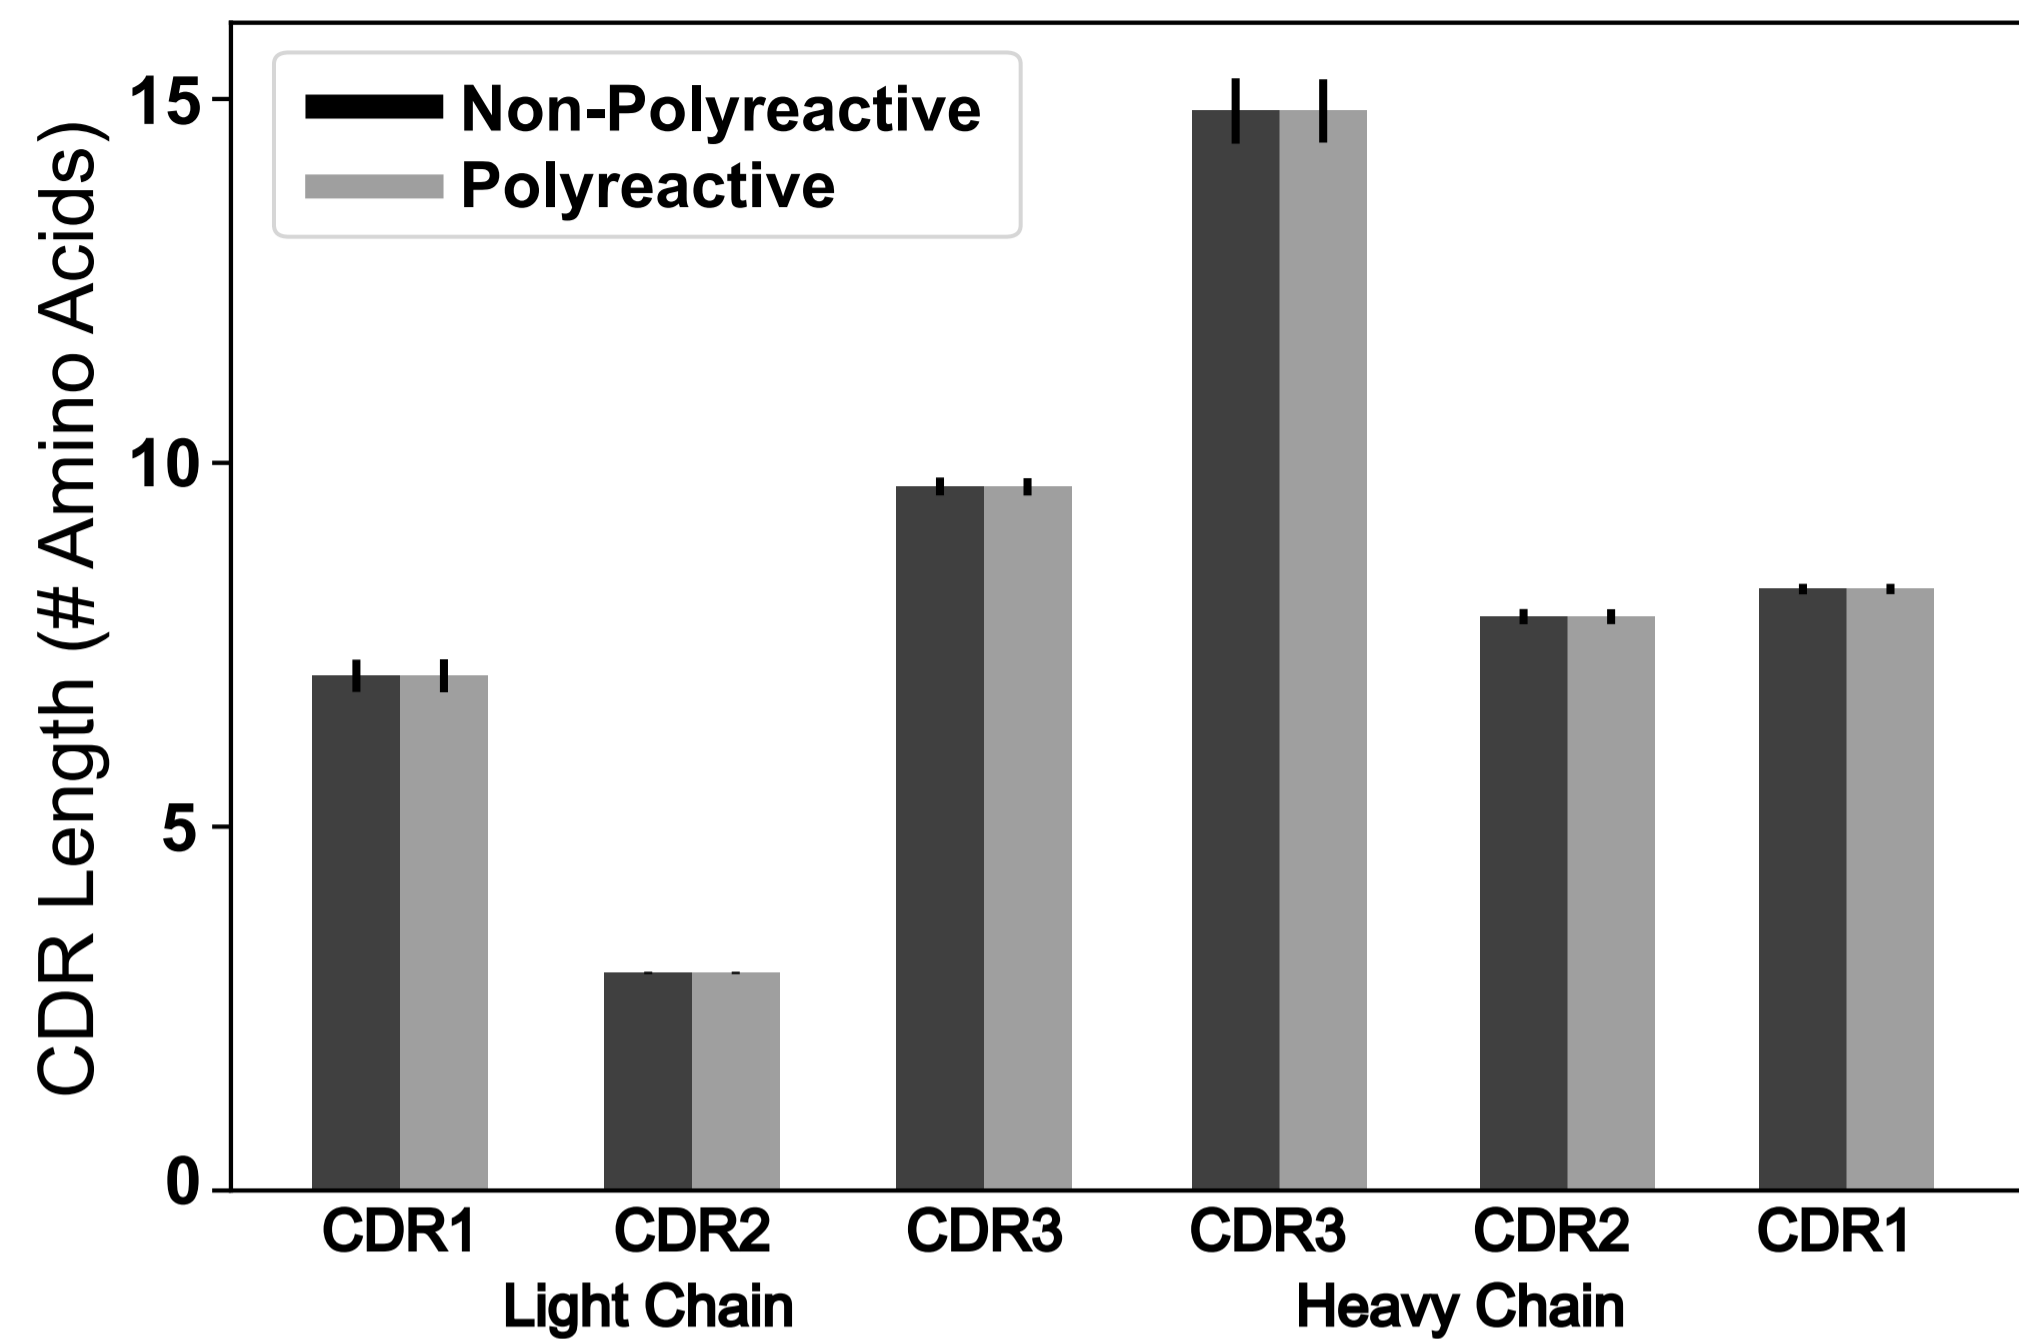**B**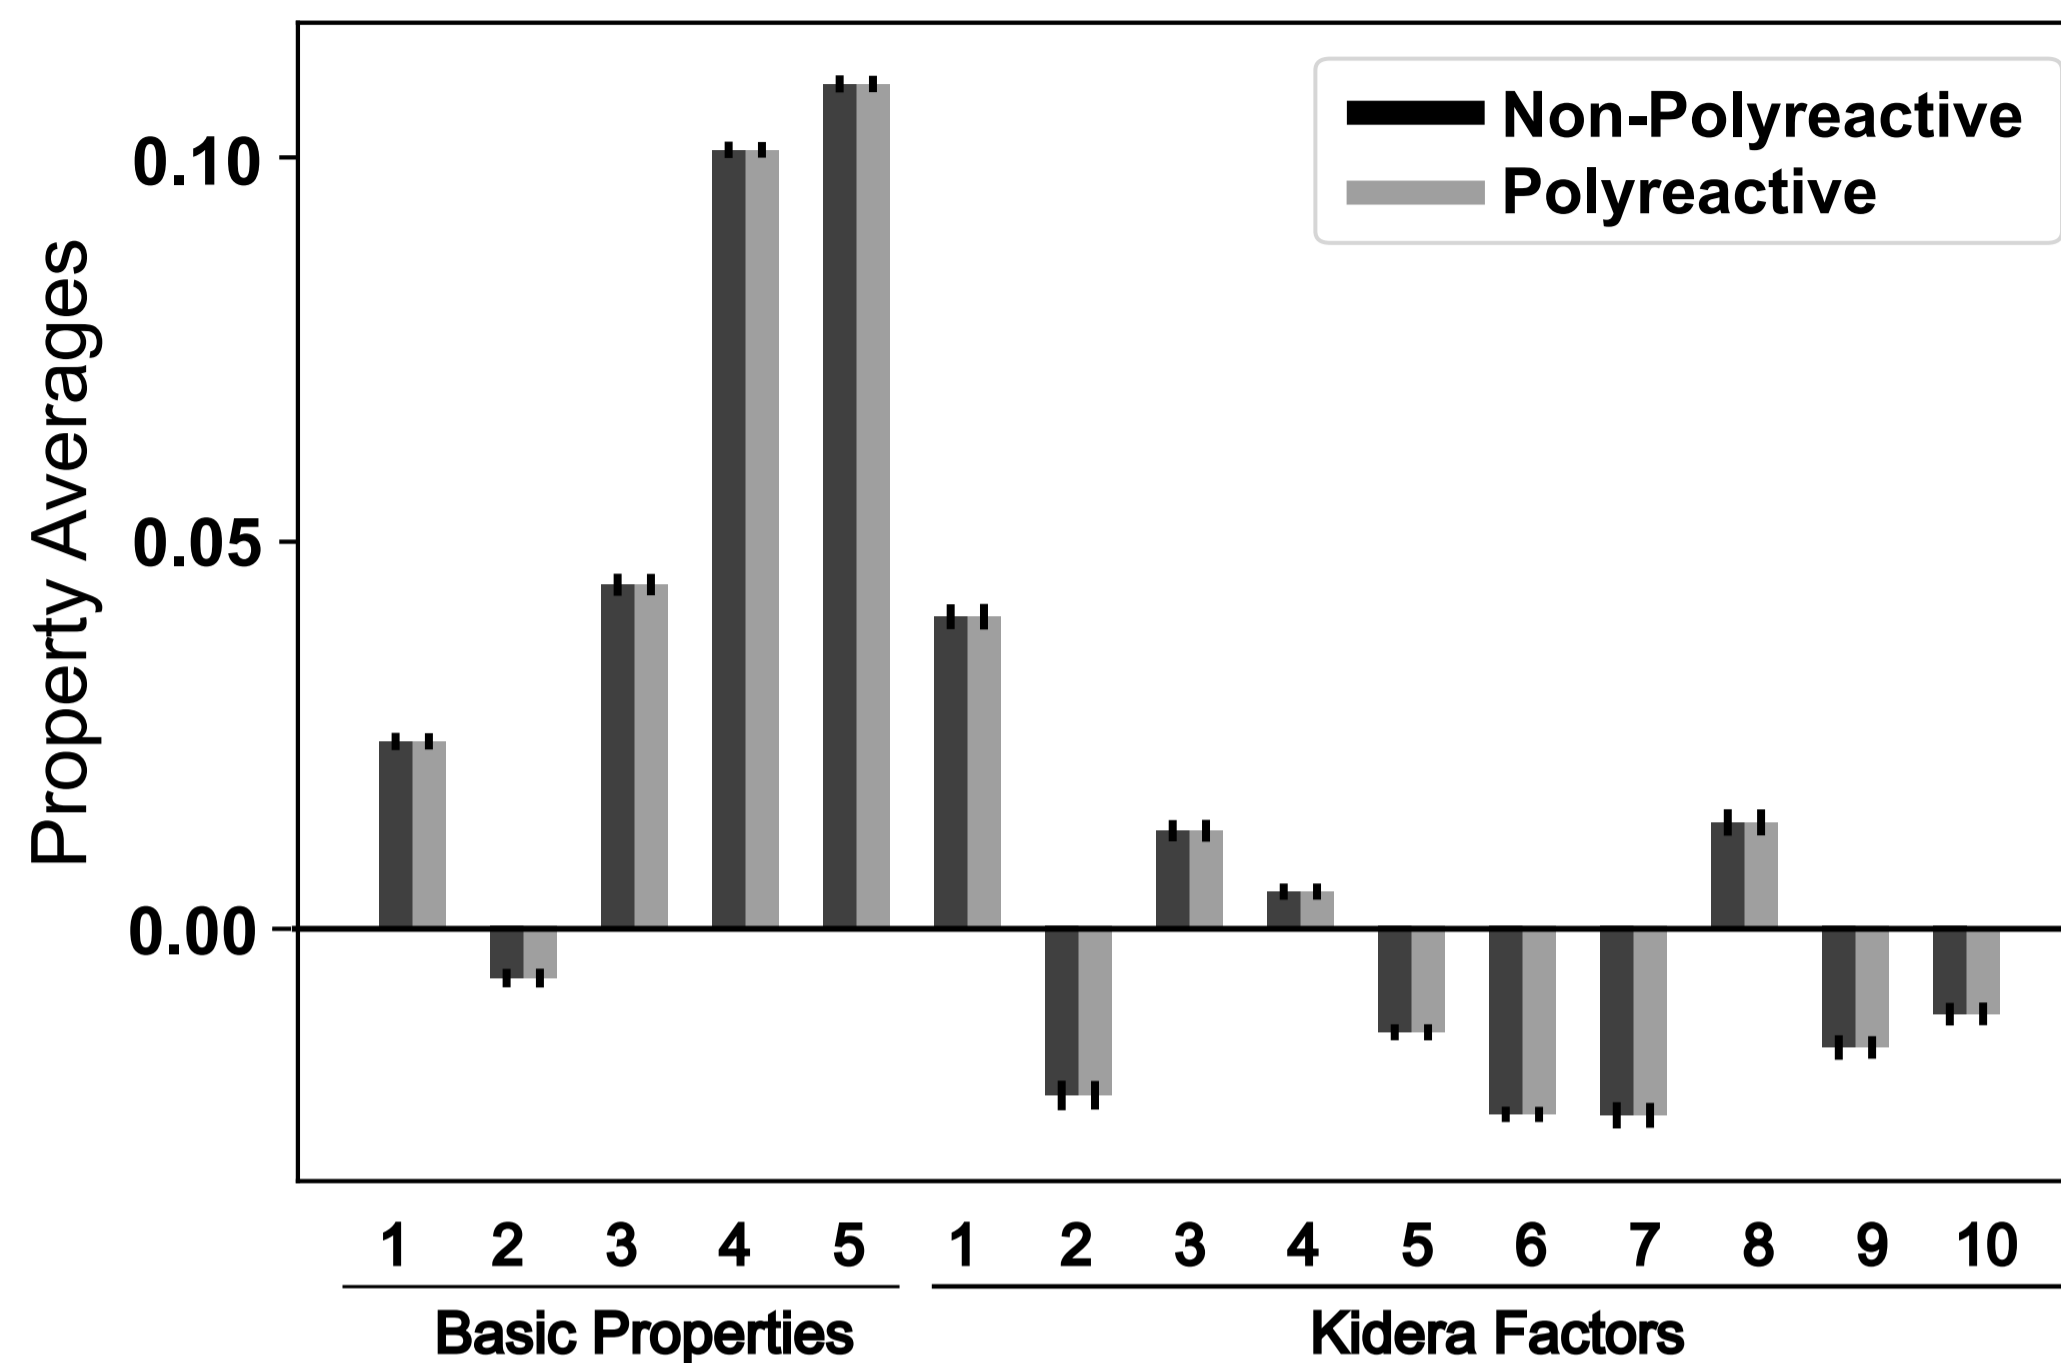**C**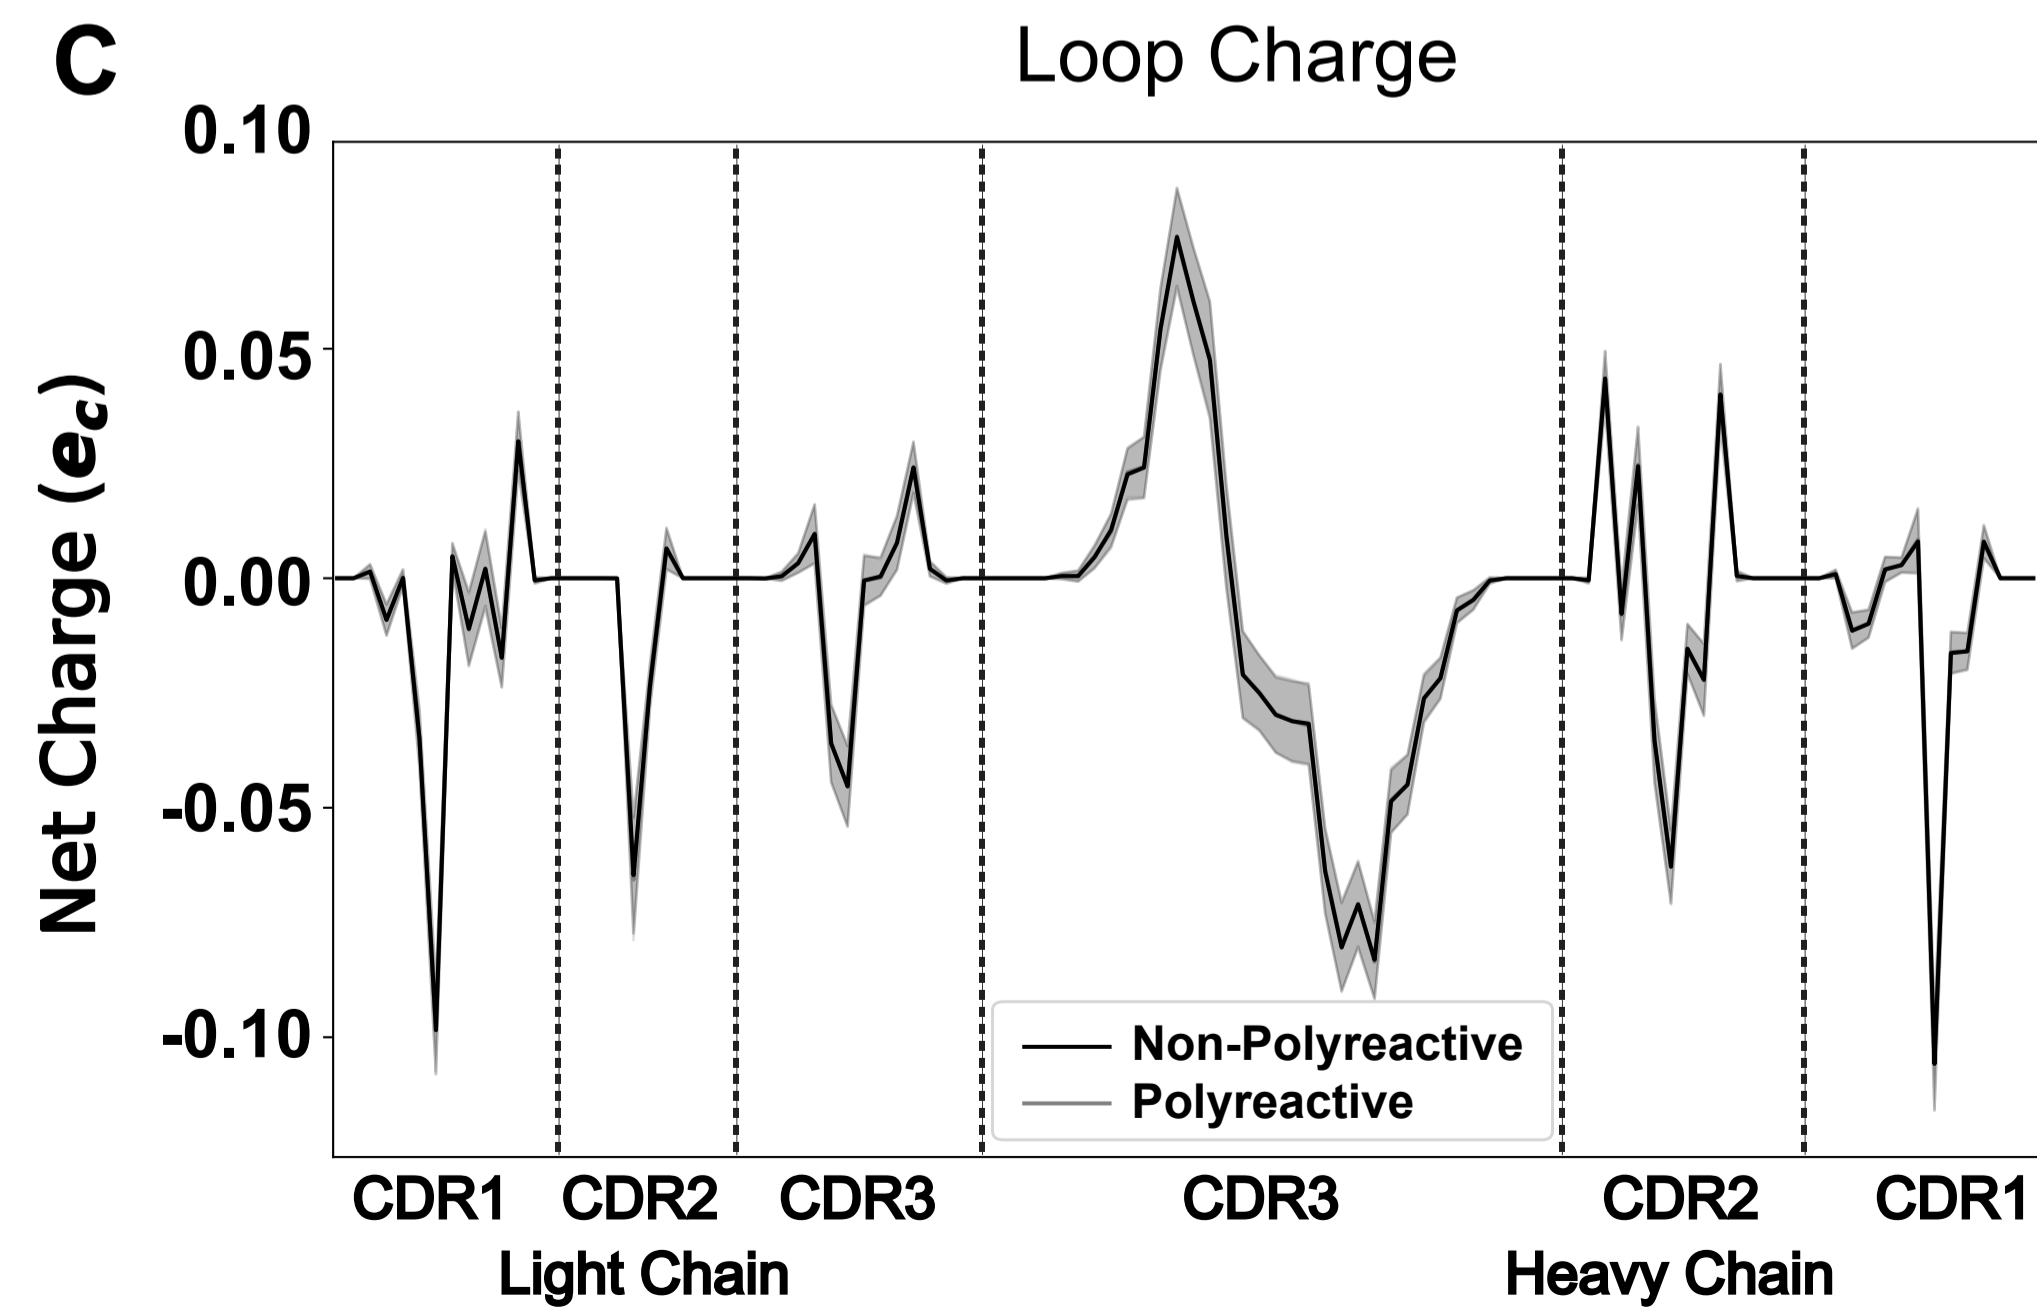**D**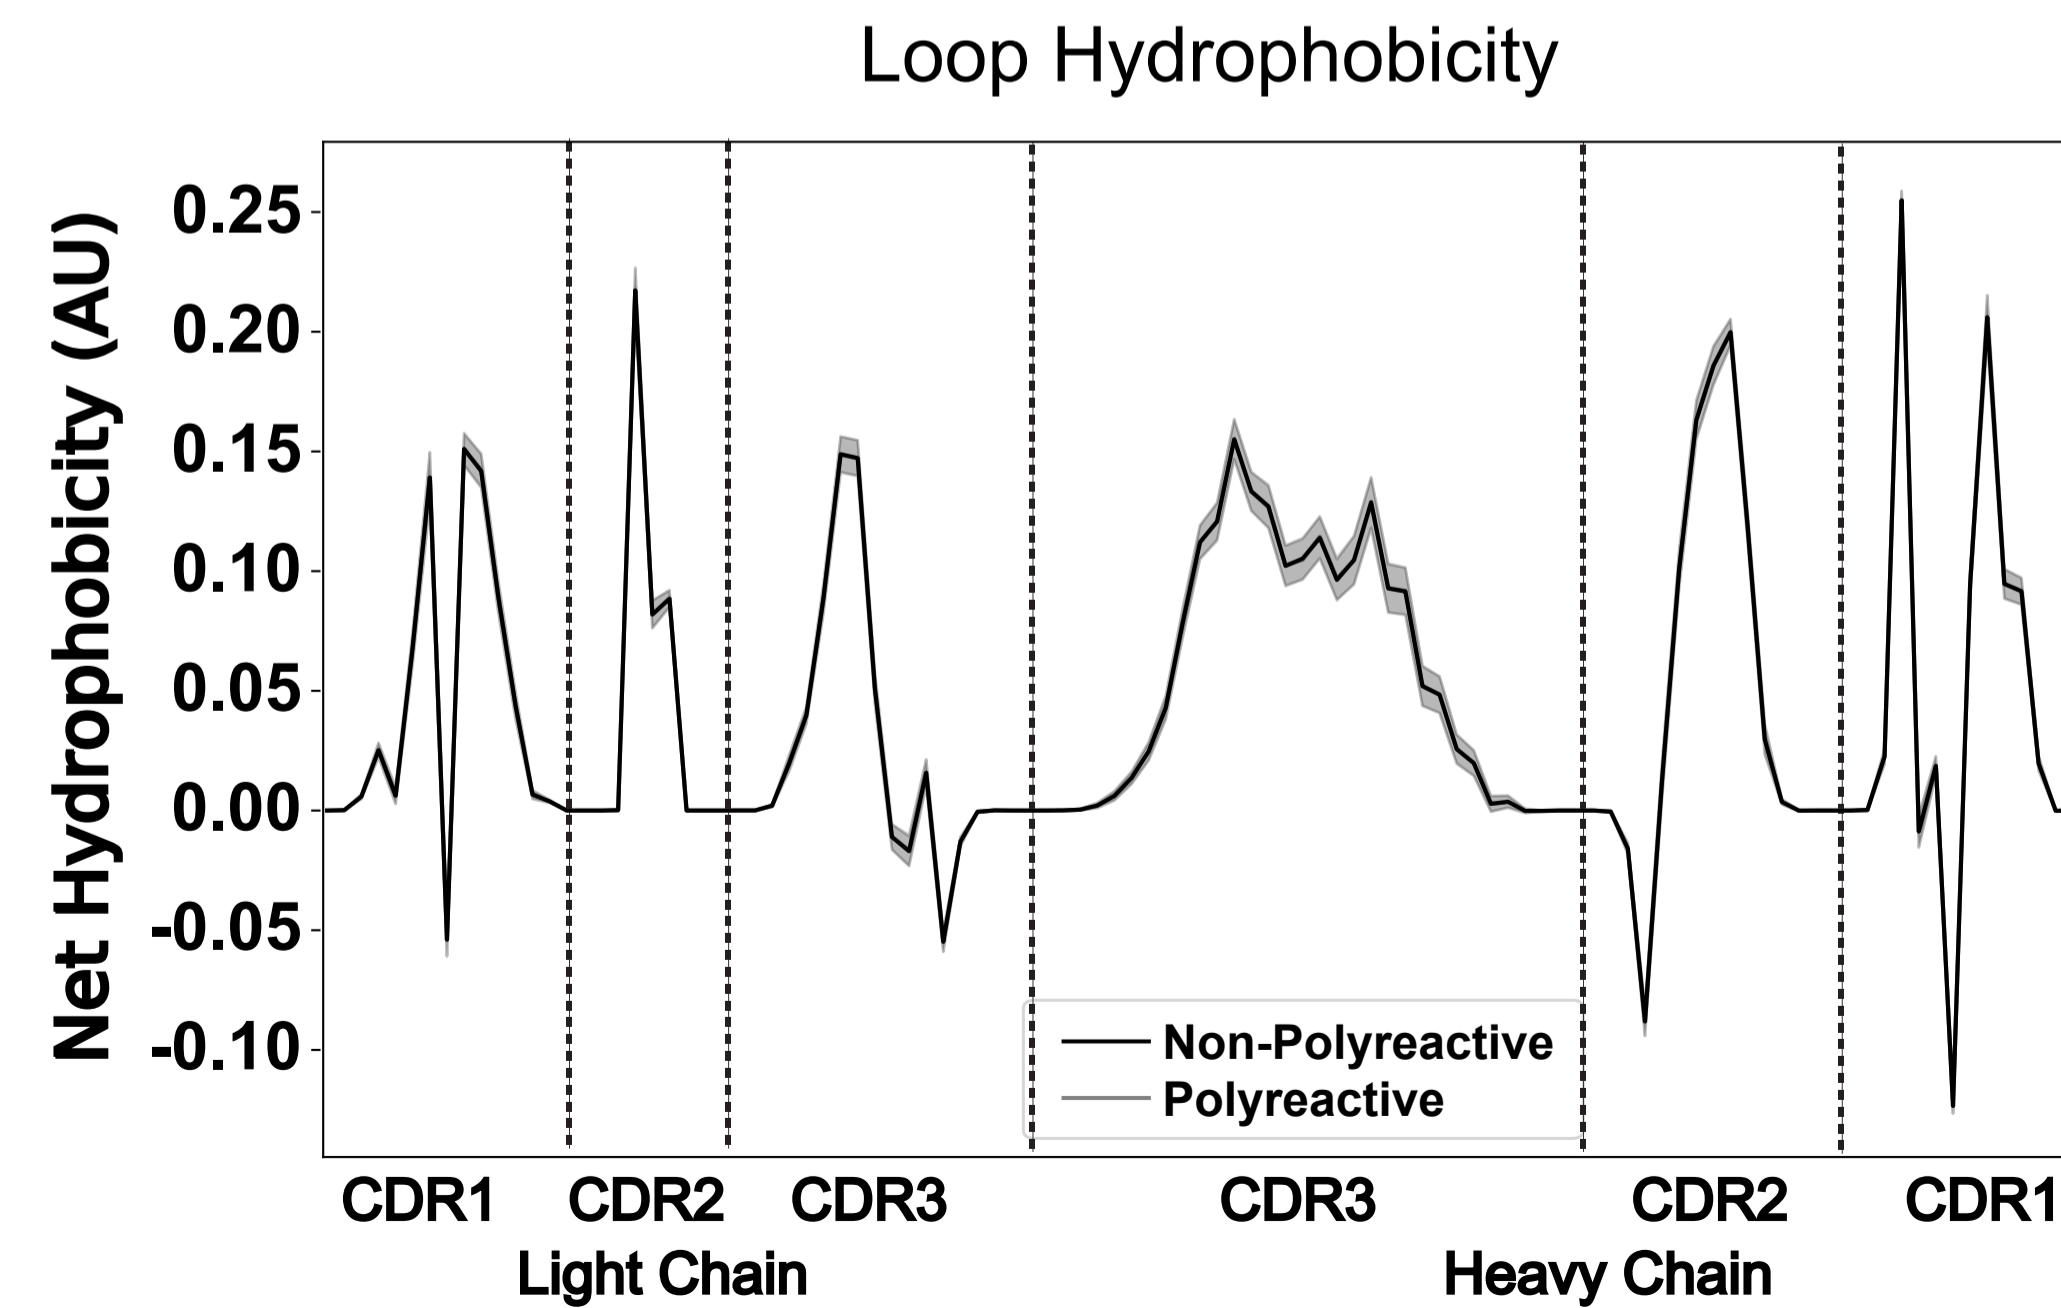

Supplement: supp [file elife-61393-supp-v1.zip › elife_poa_e61393_Figure_3_figure_supplement_2.pdf]

**A****Parsed Dataset**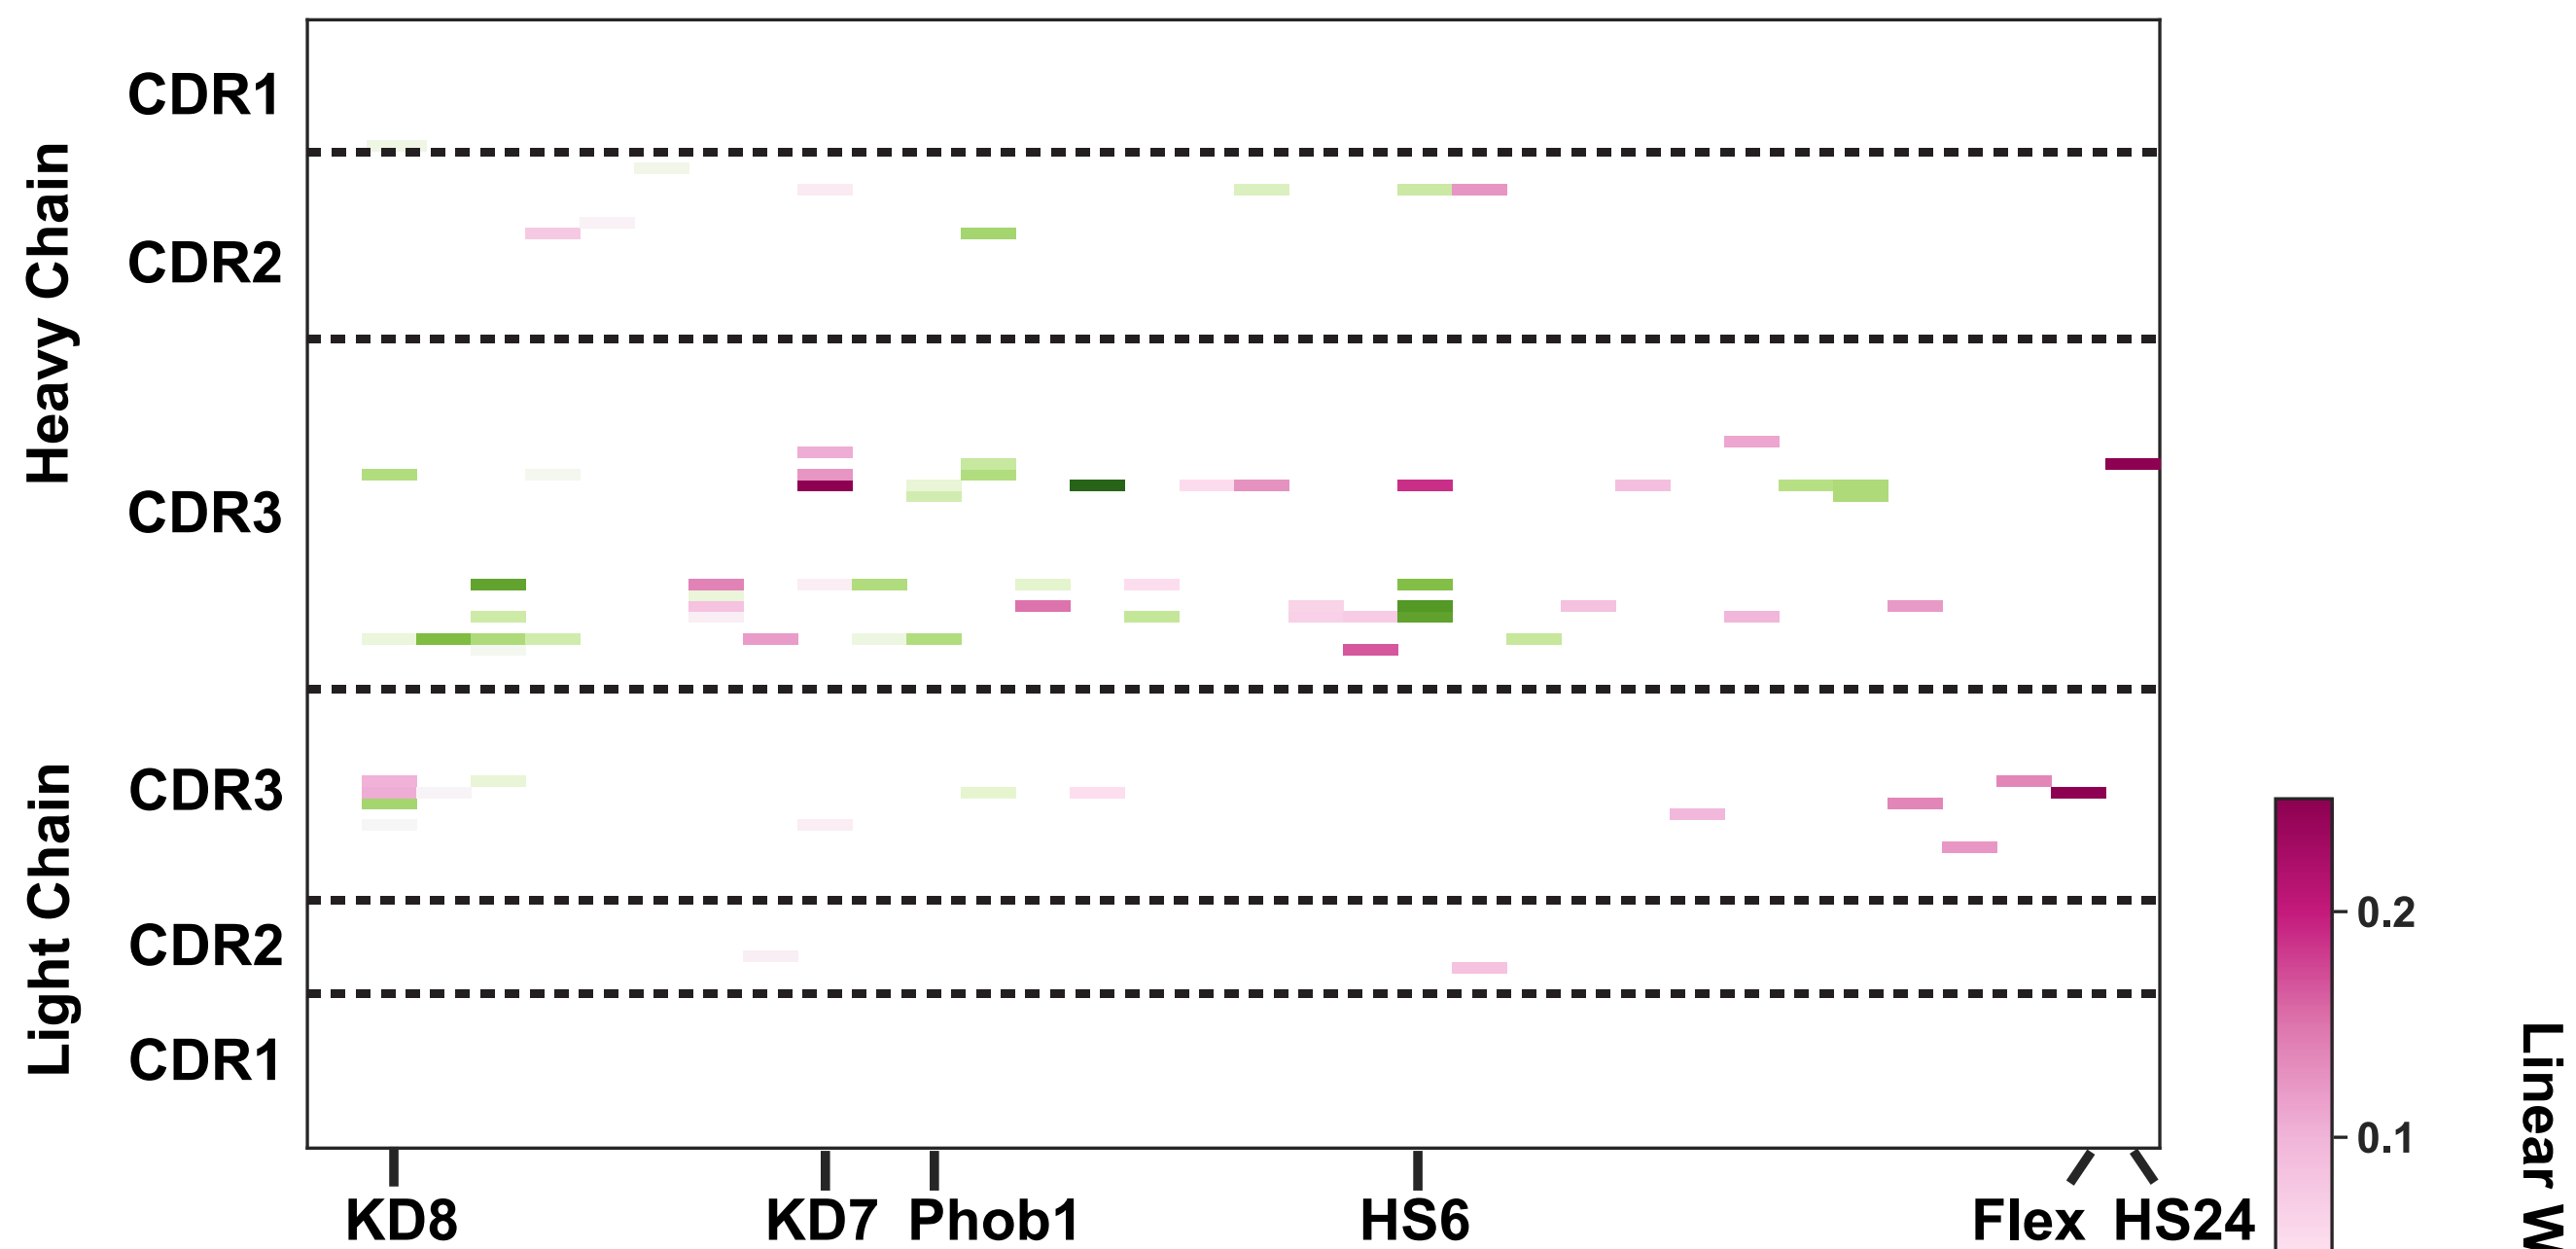**B****HIV Dataset**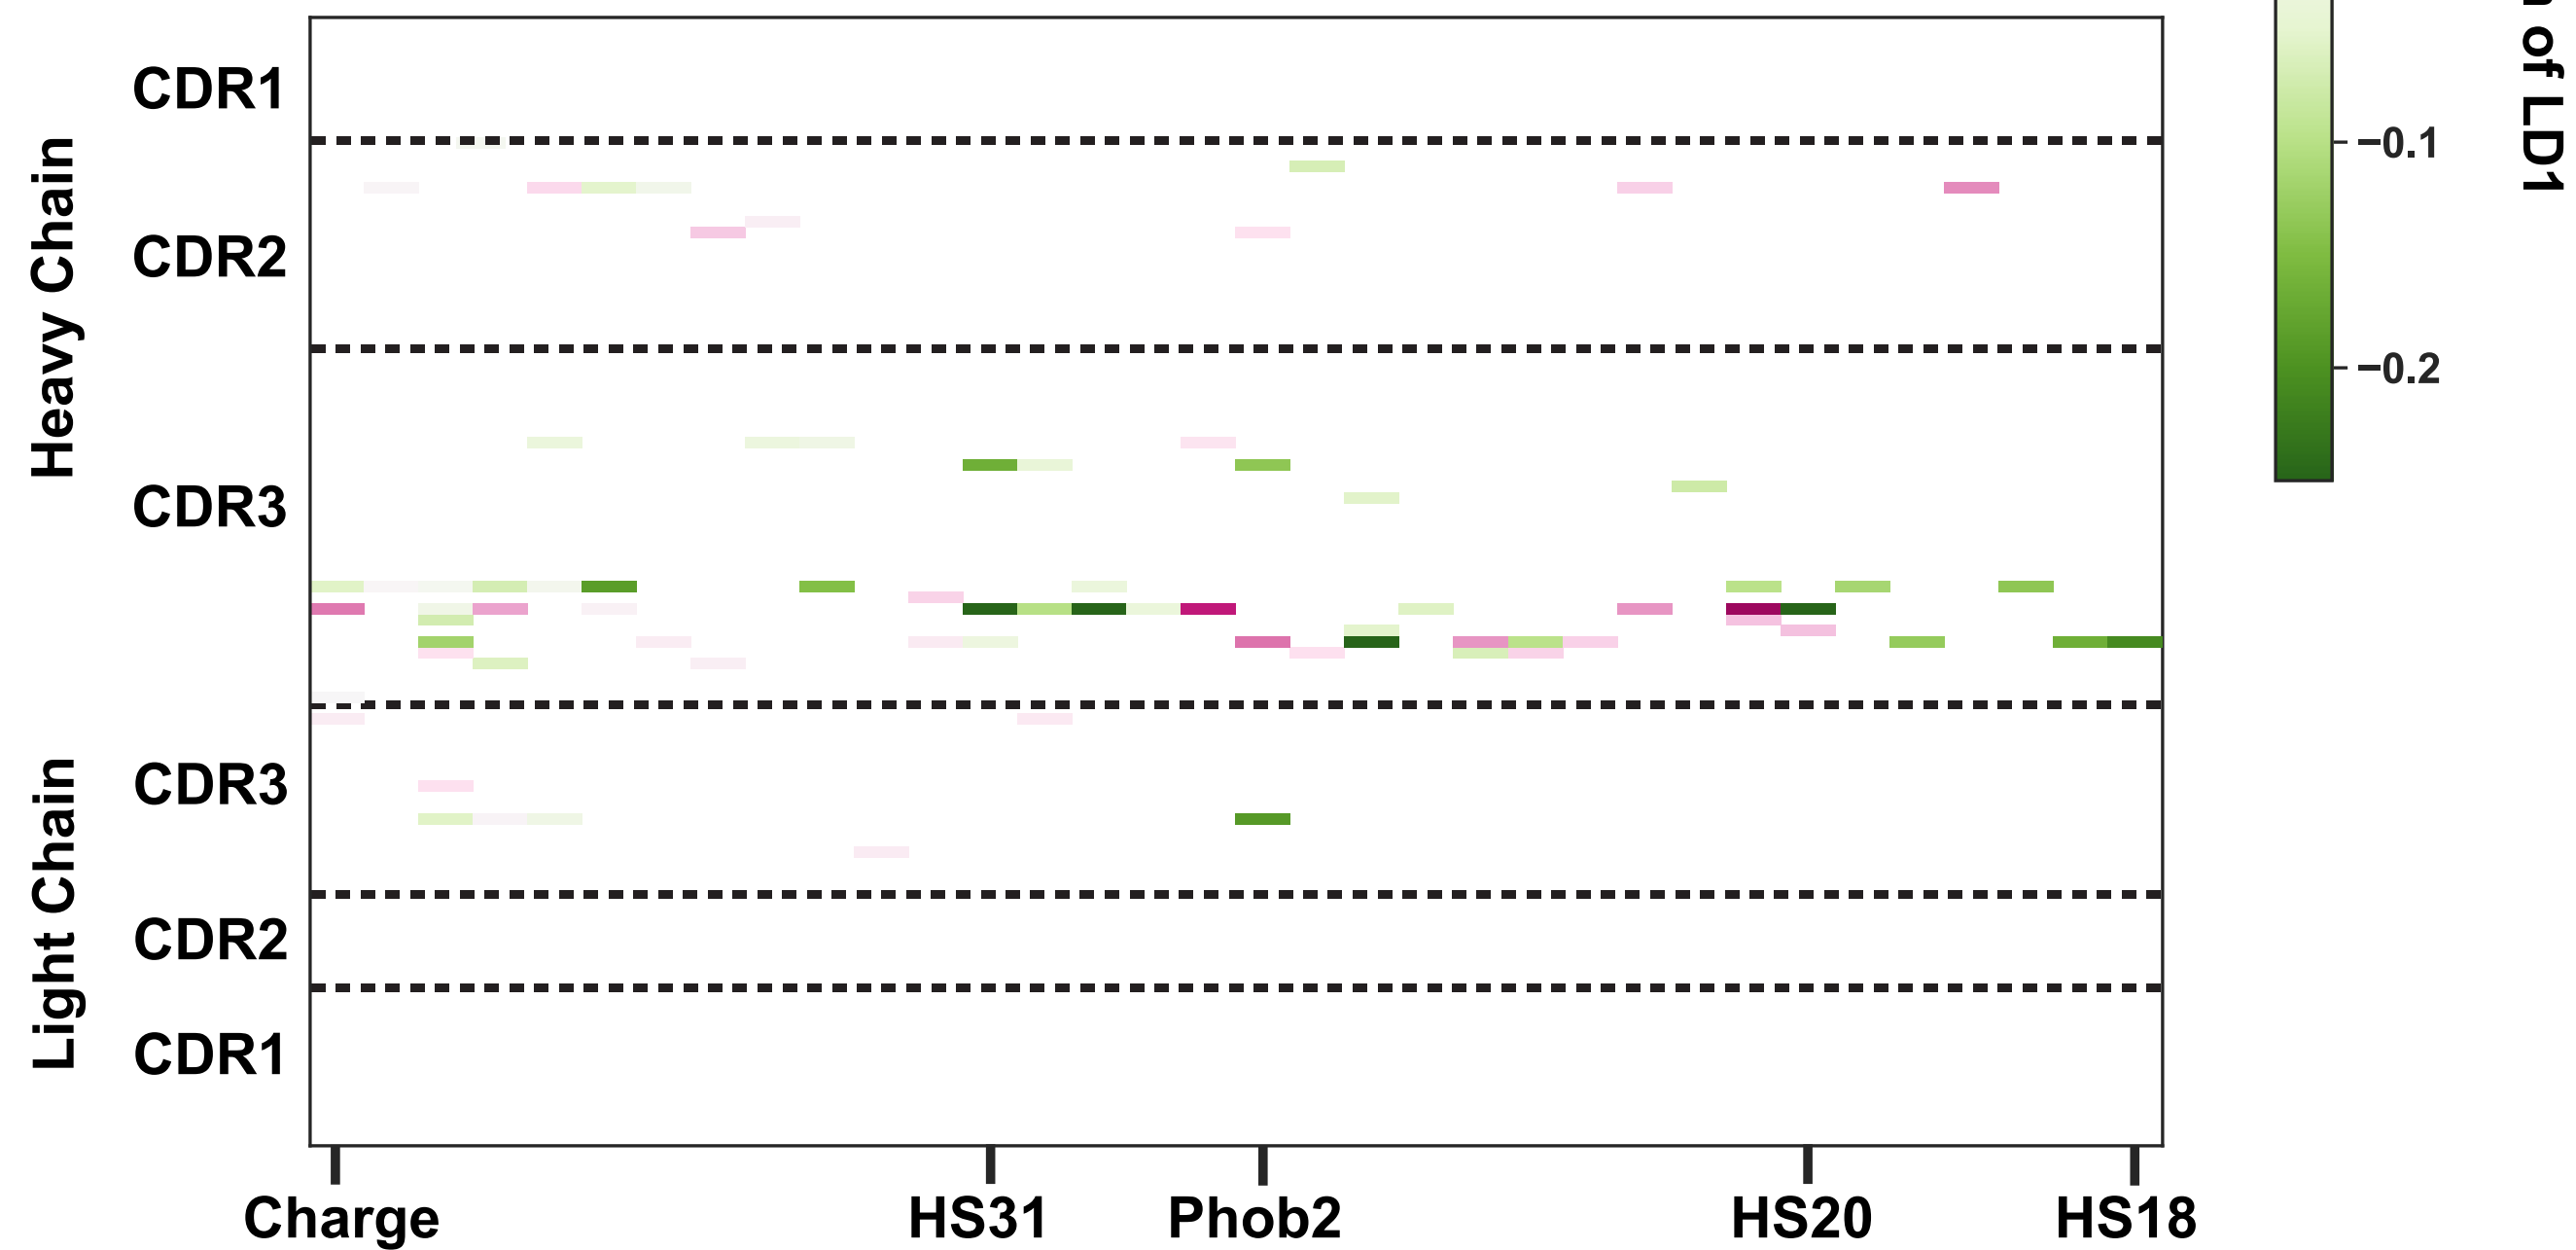

Supplement: supp [file elife-61393-supp-v1.zip › elife_poa_e61393_Figure_4_figure_supplement_3.pdf]

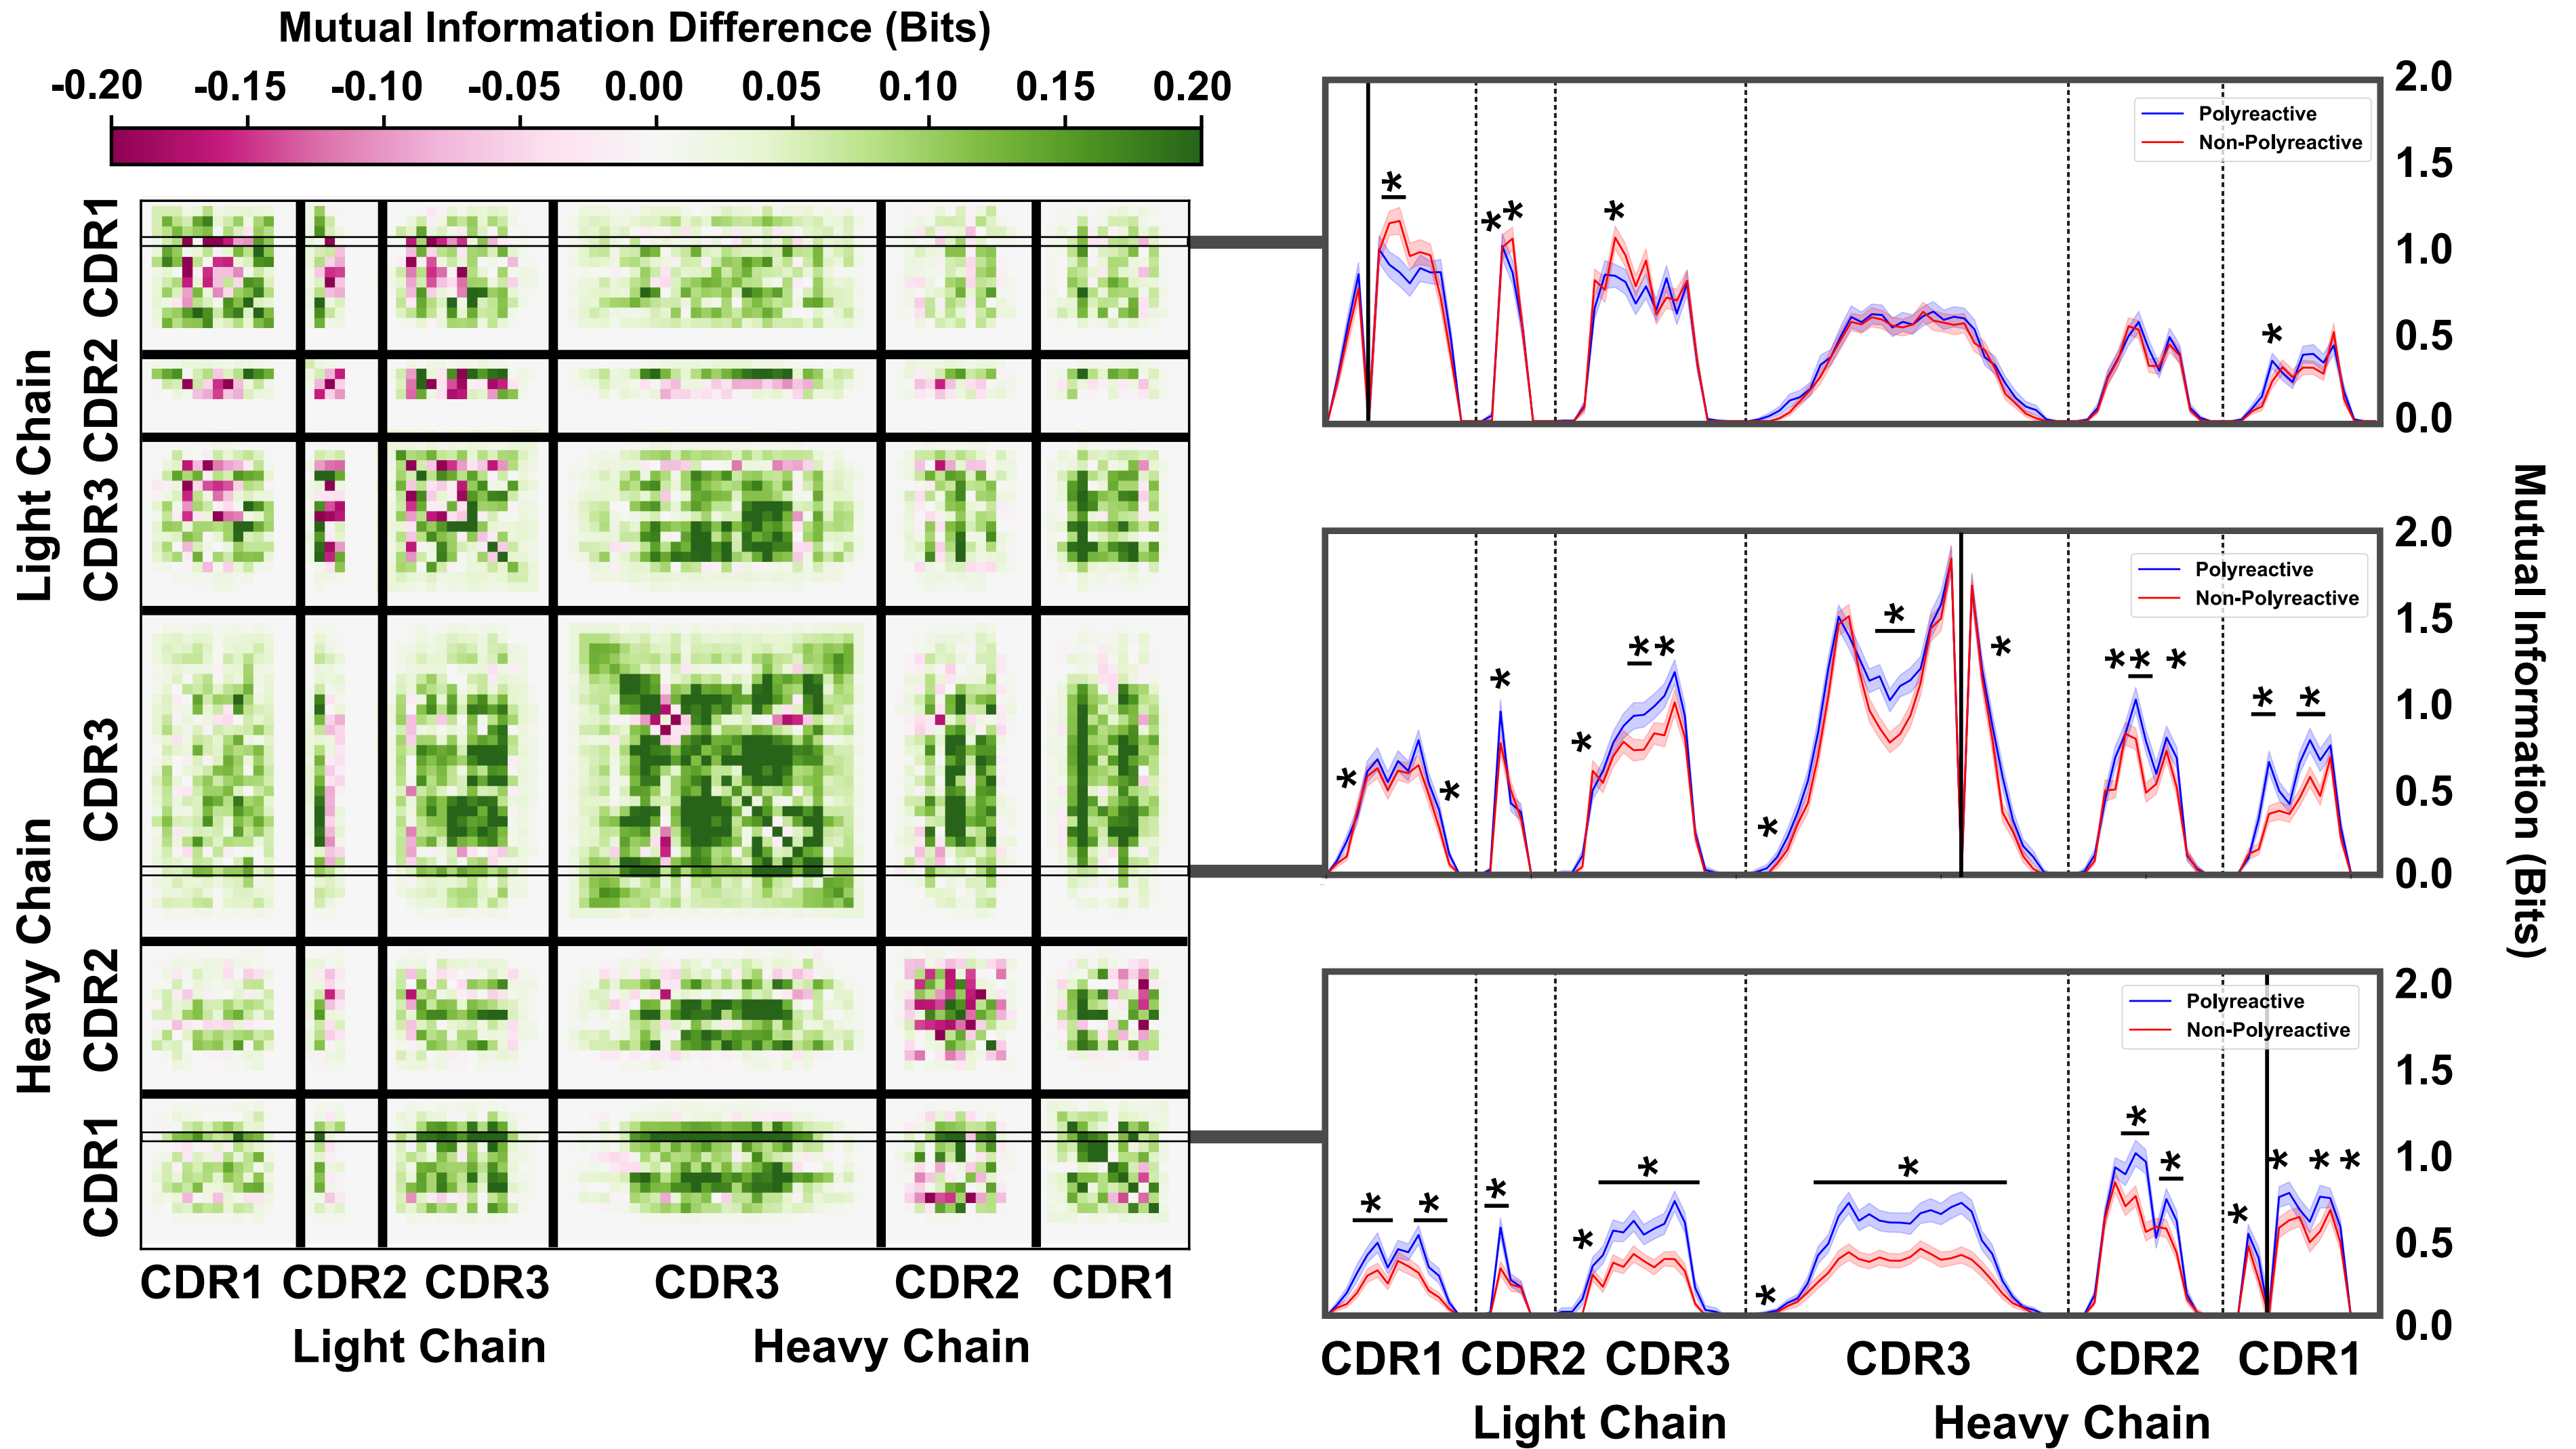

Supplement: supp [file elife-61393-supp-v1.zip › elife_poa_e61393_Figure_5_figure_supplement_1.pdf]
